# Supplementary material for: Expression Profile of RNA Binding Protein in Cervical Cancer
Source: Research Square preprint supplement (doi:10.21203/rs.3.rs-655697/v1), 2021-08-02
Supplement: Supplementary file 1 [file a65eadb1ab52244d5ab0e32a.xlsx]

## Sheet: Sample Setup
Block Type	384-Well Block
Calibration Background is expired	No
Calibration Background performed on	07-08-2021
Calibration Normalization FAM-ROX is expired	Yes
Calibration Normalization FAM-ROX performed on	11-06-2019
Calibration Normalization VIC-ROX is expired	Yes
Calibration Normalization VIC-ROX performed on	11-06-2019
Calibration Pure Dye ABY is expired	No
Calibration Pure Dye ABY performed on	07-08-2021
Calibration Pure Dye CY5 is expired	No
Calibration Pure Dye CY5 performed on	07-08-2021
Calibration Pure Dye FAM is expired	No
Calibration Pure Dye FAM performed on	07-08-2021
Calibration Pure Dye JUN is expired	No
Calibration Pure Dye JUN performed on	07-08-2021
Calibration Pure Dye MUSTANG PURPLE is expired	No
Calibration Pure Dye MUSTANG PURPLE performed on	07-08-2021
Calibration Pure Dye NED is expired	No
Calibration Pure Dye NED performed on	07-08-2021
Calibration Pure Dye ROX is expired	No
Calibration Pure Dye ROX performed on	07-08-2021
Calibration Pure Dye SYBR is expired	No
Calibration Pure Dye SYBR performed on	07-08-2021
Calibration Pure Dye TAMRA is expired	No
Calibration Pure Dye TAMRA performed on	07-08-2021
Calibration Pure Dye VIC is expired	No
Calibration Pure Dye VIC performed on	07-08-2021
Calibration ROI is expired	No
Calibration ROI performed on	07-08-2021
Calibration Uniformity is expired	No
Calibration Uniformity performed on	07-08-2021
Chemistry	SYBR_GREEN
Date Created	2021-07-17 06:55:48 AM GMT+08:00
Experiment Barcode
Experiment Comment
Experiment File Name	C:\Users\Administrator\Desktop\2021-07-17 065544.eds
Experiment Name	2021-07-17 065544
Experiment Run End Time	2021-07-18 04:47:10 AM GMT+08:00
Experiment Type	Comparative Cт (ΔΔCт)
Instrument Name	278860858
Instrument Serial Number	278860858
Instrument Type	QuantStudio(TM) 6 Flex System
Passive Reference	ROX
Quantification Cycle Method	Ct
Signal Smoothing On	true
Stage/ Cycle where Analysis is performed	Stage 2, Step 2
User Name
Well	Well Position	Sample Name	Sample Color	Biogroup Name	Biogroup Color	Target Name	Target Color	Task	Reporter	Quencher	Quantity	Comments
1	A1	1N	RGB(176,23,31)			POLR2J2	RGB(176,23,31)	UNKNOWN	SYBR	None
2	A2	1N	RGB(176,23,31)			POLR2J2	RGB(176,23,31)	UNKNOWN	SYBR	None
3	A3	1N	RGB(176,23,31)			POLR2J2	RGB(176,23,31)	UNKNOWN	SYBR	None
4	A4	1N	RGB(176,23,31)			GAPDH	RGB(0,0,255)	UNKNOWN	SYBR	None
5	A5	1N	RGB(176,23,31)			GAPDH	RGB(0,0,255)	UNKNOWN	SYBR	None
6	A6	1N	RGB(176,23,31)			GAPDH	RGB(0,0,255)	UNKNOWN	SYBR	None
7	A7	1N	RGB(176,23,31)			PABPC1L2B	RGB(0,139,69)	UNKNOWN	SYBR	None
8	A8	1N	RGB(176,23,31)			PABPC1L2B	RGB(0,139,69)	UNKNOWN	SYBR	None
9	A9	1N	RGB(176,23,31)			PABPC1L2B	RGB(0,139,69)	UNKNOWN	SYBR	None
10	A10	1N	RGB(176,23,31)			NXF2B	RGB(238,238,0)	UNKNOWN	SYBR	None
11	A11	1N	RGB(176,23,31)			NXF2B	RGB(238,238,0)	UNKNOWN	SYBR	None
12	A12	1N	RGB(176,23,31)			NXF2B	RGB(238,238,0)	UNKNOWN	SYBR	None
13	A13
14	A14
15	A15
16	A16
17	A17
18	A18
19	A19
20	A20
21	A21
22	A22
23	A23
24	A24
25	B1	2N	RGB(0,0,255)			POLR2J2	RGB(176,23,31)	UNKNOWN	SYBR	None
26	B2	2N	RGB(0,0,255)			POLR2J2	RGB(176,23,31)	UNKNOWN	SYBR	None
27	B3	2N	RGB(0,0,255)			POLR2J2	RGB(176,23,31)	UNKNOWN	SYBR	None
28	B4	2N	RGB(0,0,255)			GAPDH	RGB(0,0,255)	UNKNOWN	SYBR	None
29	B5	2N	RGB(0,0,255)			GAPDH	RGB(0,0,255)	UNKNOWN	SYBR	None
30	B6	2N	RGB(0,0,255)			GAPDH	RGB(0,0,255)	UNKNOWN	SYBR	None
31	B7	2N	RGB(0,0,255)			PABPC1L2B	RGB(0,139,69)	UNKNOWN	SYBR	None
32	B8	2N	RGB(0,0,255)			PABPC1L2B	RGB(0,139,69)	UNKNOWN	SYBR	None
33	B9	2N	RGB(0,0,255)			PABPC1L2B	RGB(0,139,69)	UNKNOWN	SYBR	None
34	B10	2N	RGB(0,0,255)			NXF2B	RGB(238,238,0)	UNKNOWN	SYBR	None
35	B11	2N	RGB(0,0,255)			NXF2B	RGB(238,238,0)	UNKNOWN	SYBR	None
36	B12	2N	RGB(0,0,255)			NXF2B	RGB(238,238,0)	UNKNOWN	SYBR	None
37	B13
38	B14
39	B15
40	B16
41	B17
42	B18
43	B19
44	B20
45	B21
46	B22
47	B23
48	B24
49	C1	3N	RGB(0,139,69)			POLR2J2	RGB(176,23,31)	UNKNOWN	SYBR	None
50	C2	3N	RGB(0,139,69)			POLR2J2	RGB(176,23,31)	UNKNOWN	SYBR	None
51	C3	3N	RGB(0,139,69)			POLR2J2	RGB(176,23,31)	UNKNOWN	SYBR	None
52	C4	3N	RGB(0,139,69)			GAPDH	RGB(0,0,255)	UNKNOWN	SYBR	None
53	C5	3N	RGB(0,139,69)			GAPDH	RGB(0,0,255)	UNKNOWN	SYBR	None
54	C6	3N	RGB(0,139,69)			GAPDH	RGB(0,0,255)	UNKNOWN	SYBR	None
55	C7	3N	RGB(0,139,69)			PABPC1L2B	RGB(0,139,69)	UNKNOWN	SYBR	None
56	C8	3N	RGB(0,139,69)			PABPC1L2B	RGB(0,139,69)	UNKNOWN	SYBR	None
57	C9	3N	RGB(0,139,69)			PABPC1L2B	RGB(0,139,69)	UNKNOWN	SYBR	None
58	C10	3N	RGB(0,139,69)			NXF2B	RGB(238,238,0)	UNKNOWN	SYBR	None
59	C11	3N	RGB(0,139,69)			NXF2B	RGB(238,238,0)	UNKNOWN	SYBR	None
60	C12	3N	RGB(0,139,69)			NXF2B	RGB(238,238,0)	UNKNOWN	SYBR	None
61	C13
62	C14
63	C15
64	C16
65	C17
66	C18
67	C19
68	C20
69	C21
70	C22
71	C23
72	C24
73	D1	4N	RGB(255,127,0)			POLR2J2	RGB(176,23,31)	UNKNOWN	SYBR	None
74	D2	4N	RGB(255,127,0)			POLR2J2	RGB(176,23,31)	UNKNOWN	SYBR	None
75	D3	4N	RGB(255,127,0)			POLR2J2	RGB(176,23,31)	UNKNOWN	SYBR	None
76	D4	4N	RGB(255,127,0)			GAPDH	RGB(0,0,255)	UNKNOWN	SYBR	None
77	D5	4N	RGB(255,127,0)			GAPDH	RGB(0,0,255)	UNKNOWN	SYBR	None
78	D6	4N	RGB(255,127,0)			GAPDH	RGB(0,0,255)	UNKNOWN	SYBR	None
79	D7	4N	RGB(255,127,0)			PABPC1L2B	RGB(0,139,69)	UNKNOWN	SYBR	None
80	D8	4N	RGB(255,127,0)			PABPC1L2B	RGB(0,139,69)	UNKNOWN	SYBR	None
81	D9	4N	RGB(255,127,0)			PABPC1L2B	RGB(0,139,69)	UNKNOWN	SYBR	None
82	D10	4N	RGB(255,127,0)			NXF2B	RGB(238,238,0)	UNKNOWN	SYBR	None
83	D11	4N	RGB(255,127,0)			NXF2B	RGB(238,238,0)	UNKNOWN	SYBR	None
84	D12	4N	RGB(255,127,0)			NXF2B	RGB(238,238,0)	UNKNOWN	SYBR	None
85	D13
86	D14
87	D15
88	D16
89	D17
90	D18
91	D19
92	D20
93	D21
94	D22
95	D23
96	D24
97	E1	5N	RGB(139,137,112)			POLR2J2	RGB(176,23,31)	UNKNOWN	SYBR	None
98	E2	5N	RGB(139,137,112)			POLR2J2	RGB(176,23,31)	UNKNOWN	SYBR	None
99	E3	5N	RGB(139,137,112)			POLR2J2	RGB(176,23,31)	UNKNOWN	SYBR	None
100	E4	5N	RGB(139,137,112)			GAPDH	RGB(0,0,255)	UNKNOWN	SYBR	None
101	E5	5N	RGB(139,137,112)			GAPDH	RGB(0,0,255)	UNKNOWN	SYBR	None
102	E6	5N	RGB(139,137,112)			GAPDH	RGB(0,0,255)	UNKNOWN	SYBR	None
103	E7	5N	RGB(139,137,112)			PABPC1L2B	RGB(0,139,69)	UNKNOWN	SYBR	None
104	E8	5N	RGB(139,137,112)			PABPC1L2B	RGB(0,139,69)	UNKNOWN	SYBR	None
105	E9	5N	RGB(139,137,112)			PABPC1L2B	RGB(0,139,69)	UNKNOWN	SYBR	None
106	E10	5N	RGB(139,137,112)			NXF2B	RGB(238,238,0)	UNKNOWN	SYBR	None
107	E11	5N	RGB(139,137,112)			NXF2B	RGB(238,238,0)	UNKNOWN	SYBR	None
108	E12	5N	RGB(139,137,112)			NXF2B	RGB(238,238,0)	UNKNOWN	SYBR	None
109	E13
110	E14
111	E15
112	E16
113	E17
114	E18
115	E19
116	E20
117	E21
118	E22
119	E23
120	E24
121	F1	1T	RGB(238,121,66)			POLR2J2	RGB(176,23,31)	UNKNOWN	SYBR	None
122	F2	1T	RGB(238,121,66)			POLR2J2	RGB(176,23,31)	UNKNOWN	SYBR	None
123	F3	1T	RGB(238,121,66)			POLR2J2	RGB(176,23,31)	UNKNOWN	SYBR	None
124	F4	1T	RGB(238,121,66)			GAPDH	RGB(0,0,255)	UNKNOWN	SYBR	None
125	F5	1T	RGB(238,121,66)			GAPDH	RGB(0,0,255)	UNKNOWN	SYBR	None
126	F6	1T	RGB(238,121,66)			GAPDH	RGB(0,0,255)	UNKNOWN	SYBR	None
127	F7	1T	RGB(238,121,66)			PABPC1L2B	RGB(0,139,69)	UNKNOWN	SYBR	None
128	F8	1T	RGB(238,121,66)			PABPC1L2B	RGB(0,139,69)	UNKNOWN	SYBR	None
129	F9	1T	RGB(238,121,66)			PABPC1L2B	RGB(0,139,69)	UNKNOWN	SYBR	None
130	F10	1T	RGB(238,121,66)			NXF2B	RGB(238,238,0)	UNKNOWN	SYBR	None
131	F11	1T	RGB(238,121,66)			NXF2B	RGB(238,238,0)	UNKNOWN	SYBR	None
132	F12	1T	RGB(238,121,66)			NXF2B	RGB(238,238,0)	UNKNOWN	SYBR	None
133	F13
134	F14
135	F15
136	F16
137	F17
138	F18
139	F19
140	F20
141	F21
142	F22
143	F23
144	F24
145	G1	2T	RGB(198,113,113)			POLR2J2	RGB(176,23,31)	UNKNOWN	SYBR	None
146	G2	2T	RGB(198,113,113)			POLR2J2	RGB(176,23,31)	UNKNOWN	SYBR	None
147	G3	2T	RGB(198,113,113)			POLR2J2	RGB(176,23,31)	UNKNOWN	SYBR	None
148	G4	2T	RGB(198,113,113)			GAPDH	RGB(0,0,255)	UNKNOWN	SYBR	None
149	G5	2T	RGB(198,113,113)			GAPDH	RGB(0,0,255)	UNKNOWN	SYBR	None
150	G6	2T	RGB(198,113,113)			GAPDH	RGB(0,0,255)	UNKNOWN	SYBR	None
151	G7	2T	RGB(198,113,113)			PABPC1L2B	RGB(0,139,69)	UNKNOWN	SYBR	None
152	G8	2T	RGB(198,113,113)			PABPC1L2B	RGB(0,139,69)	UNKNOWN	SYBR	None
153	G9	2T	RGB(198,113,113)			PABPC1L2B	RGB(0,139,69)	UNKNOWN	SYBR	None
154	G10	2T	RGB(198,113,113)			NXF2B	RGB(238,238,0)	UNKNOWN	SYBR	None
155	G11	2T	RGB(198,113,113)			NXF2B	RGB(238,238,0)	UNKNOWN	SYBR	None
156	G12	2T	RGB(198,113,113)			NXF2B	RGB(238,238,0)	UNKNOWN	SYBR	None
157	G13
158	G14
159	G15
160	G16
161	G17
162	G18
163	G19
164	G20
165	G21
166	G22
167	G23
168	G24
169	H1	3T	RGB(0,245,255)			POLR2J2	RGB(176,23,31)	UNKNOWN	SYBR	None
170	H2	3T	RGB(0,245,255)			POLR2J2	RGB(176,23,31)	UNKNOWN	SYBR	None
171	H3	3T	RGB(0,245,255)			POLR2J2	RGB(176,23,31)	UNKNOWN	SYBR	None
172	H4	3T	RGB(0,245,255)			GAPDH	RGB(0,0,255)	UNKNOWN	SYBR	None
173	H5	3T	RGB(0,245,255)			GAPDH	RGB(0,0,255)	UNKNOWN	SYBR	None
174	H6	3T	RGB(0,245,255)			GAPDH	RGB(0,0,255)	UNKNOWN	SYBR	None
175	H7	3T	RGB(0,245,255)			PABPC1L2B	RGB(0,139,69)	UNKNOWN	SYBR	None
176	H8	3T	RGB(0,245,255)			PABPC1L2B	RGB(0,139,69)	UNKNOWN	SYBR	None
177	H9	3T	RGB(0,245,255)			PABPC1L2B	RGB(0,139,69)	UNKNOWN	SYBR	None
178	H10	3T	RGB(0,245,255)			NXF2B	RGB(238,238,0)	UNKNOWN	SYBR	None
179	H11	3T	RGB(0,245,255)			NXF2B	RGB(238,238,0)	UNKNOWN	SYBR	None
180	H12	3T	RGB(0,245,255)			NXF2B	RGB(238,238,0)	UNKNOWN	SYBR	None
181	H13
182	H14
183	H15
184	H16
185	H17
186	H18
187	H19
188	H20
189	H21
190	H22
191	H23
192	H24
193	I1	4T	RGB(238,220,130)			POLR2J2	RGB(176,23,31)	UNKNOWN	SYBR	None
194	I2	4T	RGB(238,220,130)			POLR2J2	RGB(176,23,31)	UNKNOWN	SYBR	None
195	I3	4T	RGB(238,220,130)			POLR2J2	RGB(176,23,31)	UNKNOWN	SYBR	None
196	I4	4T	RGB(238,220,130)			GAPDH	RGB(0,0,255)	UNKNOWN	SYBR	None
197	I5	4T	RGB(238,220,130)			GAPDH	RGB(0,0,255)	UNKNOWN	SYBR	None
198	I6	4T	RGB(238,220,130)			GAPDH	RGB(0,0,255)	UNKNOWN	SYBR	None
199	I7	4T	RGB(238,220,130)			PABPC1L2B	RGB(0,139,69)	UNKNOWN	SYBR	None
200	I8	4T	RGB(238,220,130)			PABPC1L2B	RGB(0,139,69)	UNKNOWN	SYBR	None
201	I9	4T	RGB(238,220,130)			PABPC1L2B	RGB(0,139,69)	UNKNOWN	SYBR	None
202	I10	4T	RGB(238,220,130)			NXF2B	RGB(238,238,0)	UNKNOWN	SYBR	None
203	I11	4T	RGB(238,220,130)			NXF2B	RGB(238,238,0)	UNKNOWN	SYBR	None
204	I12	4T	RGB(238,220,130)			NXF2B	RGB(238,238,0)	UNKNOWN	SYBR	None
205	I13
206	I14
207	I15
208	I16
209	I17
210	I18
211	I19
212	I20
213	I21
214	I22
215	I23
216	I24
217	J1	5T	RGB(238,238,0)			POLR2J2	RGB(176,23,31)	UNKNOWN	SYBR	None
218	J2	5T	RGB(238,238,0)			POLR2J2	RGB(176,23,31)	UNKNOWN	SYBR	None
219	J3	5T	RGB(238,238,0)			POLR2J2	RGB(176,23,31)	UNKNOWN	SYBR	None
220	J4	5T	RGB(238,238,0)			GAPDH	RGB(0,0,255)	UNKNOWN	SYBR	None
221	J5	5T	RGB(238,238,0)			GAPDH	RGB(0,0,255)	UNKNOWN	SYBR	None
222	J6	5T	RGB(238,238,0)			GAPDH	RGB(0,0,255)	UNKNOWN	SYBR	None
223	J7	5T	RGB(238,238,0)			PABPC1L2B	RGB(0,139,69)	UNKNOWN	SYBR	None
224	J8	5T	RGB(238,238,0)			PABPC1L2B	RGB(0,139,69)	UNKNOWN	SYBR	None
225	J9	5T	RGB(238,238,0)			PABPC1L2B	RGB(0,139,69)	UNKNOWN	SYBR	None
226	J10	5T	RGB(238,238,0)			NXF2B	RGB(238,238,0)	UNKNOWN	SYBR	None
227	J11	5T	RGB(238,238,0)			NXF2B	RGB(238,238,0)	UNKNOWN	SYBR	None
228	J12	5T	RGB(238,238,0)			NXF2B	RGB(238,238,0)	UNKNOWN	SYBR	None
229	J13
230	J14
231	J15
232	J16
233	J17
234	J18
235	J19
236	J20
237	J21
238	J22
239	J23
240	J24
241	K1
242	K2
243	K3
244	K4
245	K5
246	K6
247	K7
248	K8
249	K9
250	K10
251	K11
252	K12
253	K13
254	K14
255	K15
256	K16
257	K17
258	K18
259	K19
260	K20
261	K21
262	K22
263	K23
264	K24
265	L1
266	L2
267	L3
268	L4
269	L5
270	L6
271	L7
272	L8
273	L9
274	L10
275	L11
276	L12
277	L13
278	L14
279	L15
280	L16
281	L17
282	L18
283	L19
284	L20
285	L21
286	L22
287	L23
288	L24
289	M1
290	M2
291	M3
292	M4
293	M5
294	M6
295	M7
296	M8
297	M9
298	M10
299	M11
300	M12
301	M13
302	M14
303	M15
304	M16
305	M17
306	M18
307	M19
308	M20
309	M21
310	M22
311	M23
312	M24
313	N1
314	N2
315	N3
316	N4
317	N5
318	N6
319	N7
320	N8
321	N9
322	N10
323	N11
324	N12
325	N13
326	N14
327	N15
328	N16
329	N17
330	N18
331	N19
332	N20
333	N21
334	N22
335	N23
336	N24
337	O1
338	O2
339	O3
340	O4
341	O5
342	O6
343	O7
344	O8
345	O9
346	O10
347	O11
348	O12
349	O13
350	O14
351	O15
352	O16
353	O17
354	O18
355	O19
356	O20
357	O21
358	O22
359	O23
360	O24
361	P1
362	P2
363	P3
364	P4
365	P5
366	P6
367	P7
368	P8
369	P9
370	P10
371	P11
372	P12
373	P13
374	P14
375	P15
376	P16
377	P17
378	P18
379	P19
380	P20
381	P21
382	P22
383	P23
384	P24

## Sheet: Amplification Data
Block Type	384-Well Block
Calibration Background is expired	No
Calibration Background performed on	07-08-2021
Calibration Normalization FAM-ROX is expired	Yes
Calibration Normalization FAM-ROX performed on	11-06-2019
Calibration Normalization VIC-ROX is expired	Yes
Calibration Normalization VIC-ROX performed on	11-06-2019
Calibration Pure Dye ABY is expired	No
Calibration Pure Dye ABY performed on	07-08-2021
Calibration Pure Dye CY5 is expired	No
Calibration Pure Dye CY5 performed on	07-08-2021
Calibration Pure Dye FAM is expired	No
Calibration Pure Dye FAM performed on	07-08-2021
Calibration Pure Dye JUN is expired	No
Calibration Pure Dye JUN performed on	07-08-2021
Calibration Pure Dye MUSTANG PURPLE is expired	No
Calibration Pure Dye MUSTANG PURPLE performed on	07-08-2021
Calibration Pure Dye NED is expired	No
Calibration Pure Dye NED performed on	07-08-2021
Calibration Pure Dye ROX is expired	No
Calibration Pure Dye ROX performed on	07-08-2021
Calibration Pure Dye SYBR is expired	No
Calibration Pure Dye SYBR performed on	07-08-2021
Calibration Pure Dye TAMRA is expired	No
Calibration Pure Dye TAMRA performed on	07-08-2021
Calibration Pure Dye VIC is expired	No
Calibration Pure Dye VIC performed on	07-08-2021
Calibration ROI is expired	No
Calibration ROI performed on	07-08-2021
Calibration Uniformity is expired	No
Calibration Uniformity performed on	07-08-2021
Chemistry	SYBR_GREEN
Date Created	2021-07-17 06:55:48 AM GMT+08:00
Experiment Barcode
Experiment Comment
Experiment File Name	C:\Users\Administrator\Desktop\2021-07-17 065544.eds
Experiment Name	2021-07-17 065544
Experiment Run End Time	2021-07-18 04:47:10 AM GMT+08:00
Experiment Type	Comparative Cт (ΔΔCт)
Instrument Name	278860858
Instrument Serial Number	278860858
Instrument Type	QuantStudio(TM) 6 Flex System
Passive Reference	ROX
Quantification Cycle Method	Ct
Signal Smoothing On	true
Stage/ Cycle where Analysis is performed	Stage 2, Step 2
User Name
Well	Cycle	Target Name	Rn	Delta Rn
1	1	POLR2J2	0.305993	-0.00760164
1	2	POLR2J2	0.308393	-0.00531761
1	3	POLR2J2	0.31212	-0.00170701
1	4	POLR2J2	0.312293	-0.00164951
1	5	POLR2J2	0.312961	-0.00109822
1	6	POLR2J2	0.314283	0.000108076
1	7	POLR2J2	0.315931	0.00164005
1	8	POLR2J2	0.315323	0.000915357
1	9	POLR2J2	0.316089	0.00156613
1	10	POLR2J2	0.315277	0.000638131
1	11	POLR2J2	0.315819	0.00106399
1	12	POLR2J2	0.31598	0.00110891
1	13	POLR2J2	0.315167	0.000179393
1	14	POLR2J2	0.314635	-0.000468378
1	15	POLR2J2	0.315225	4.92574e-06
1	16	POLR2J2	0.31549	0.000154099
1	17	POLR2J2	0.314732	-0.000719454
1	18	POLR2J2	0.315721	0.000152992
1	19	POLR2J2	0.31446	-0.00122342
1	20	POLR2J2	0.315134	-0.000666069
1	21	POLR2J2	0.319145	0.00322929
1	22	POLR2J2	0.329269	0.0132368
1	23	POLR2J2	0.342713	0.0265649
1	24	POLR2J2	0.373788	0.0575239
1	25	POLR2J2	0.429857	0.113477
1	26	POLR2J2	0.542766	0.226269
1	27	POLR2J2	0.747286	0.430674
1	28	POLR2J2	1.08987	0.77314
1	29	POLR2J2	1.60124	1.28439
1	30	POLR2J2	2.23317	1.91621
1	31	POLR2J2	2.84971	2.53264
1	32	POLR2J2	3.30951	2.99232
1	33	POLR2J2	3.61588	3.29857
1	34	POLR2J2	3.81116	3.49373
1	35	POLR2J2	3.93982	3.62228
1	36	POLR2J2	4.02835	3.71069
1	37	POLR2J2	4.08726	3.76948
1	38	POLR2J2	4.1369	3.81901
1	39	POLR2J2	4.17965	3.86165
1	40	POLR2J2	4.19792	3.8798
2	1	POLR2J2	0.332034	-0.00620341
2	2	POLR2J2	0.333238	-0.00517458
2	3	POLR2J2	0.336253	-0.00233401
2	4	POLR2J2	0.336466	-0.00229504
2	5	POLR2J2	0.337729	-0.00120709
2	6	POLR2J2	0.337736	-0.00137432
2	7	POLR2J2	0.340037	0.000751143
2	8	POLR2J2	0.342867	0.00340744
2	9	POLR2J2	0.34349	0.00385554
2	10	POLR2J2	0.342544	0.00273514
2	11	POLR2J2	0.341083	0.00109932
2	12	POLR2J2	0.341582	0.00142347
2	13	POLR2J2	0.339859	-0.00047379
2	14	POLR2J2	0.338595	-0.00191268
2	15	POLR2J2	0.340185	-0.00049768
2	16	POLR2J2	0.339725	-0.00113233
2	17	POLR2J2	0.340389	-0.000642479
2	18	POLR2J2	0.340613	-0.000593493
2	19	POLR2J2	0.33981	-0.00157135
2	20	POLR2J2	0.340862	-0.000694066
2	21	POLR2J2	0.343187	0.00145628
2	22	POLR2J2	0.350242	0.00833712
2	23	POLR2J2	0.362196	0.0201161
2	24	POLR2J2	0.389303	0.0470487
2	25	POLR2J2	0.44217	0.0997408
2	26	POLR2J2	0.539097	0.196493
2	27	POLR2J2	0.720869	0.37809
2	28	POLR2J2	1.03355	0.690594
2	29	POLR2J2	1.51187	1.16874
2	30	POLR2J2	2.12473	1.78143
2	31	POLR2J2	2.75846	2.41498
2	32	POLR2J2	3.26411	2.92046
2	33	POLR2J2	3.60115	3.25733
2	34	POLR2J2	3.81695	3.47295
2	35	POLR2J2	3.9583	3.61412
2	36	POLR2J2	4.04955	3.7052
2	37	POLR2J2	4.12113	3.77661
2	38	POLR2J2	4.16582	3.82112
2	39	POLR2J2	4.19962	3.85474
2	40	POLR2J2	4.22255	3.8775
3	1	POLR2J2	0.321208	-0.00577696
3	2	POLR2J2	0.323799	-0.00292024
3	3	POLR2J2	0.326615	0.000161464
3	4	POLR2J2	0.326729	0.000542119
3	5	POLR2J2	0.326011	8.96513e-05
3	6	POLR2J2	0.326786	0.00113055
3	7	POLR2J2	0.32568	0.000290321
3	8	POLR2J2	0.324799	-0.000324182
3	9	POLR2J2	0.32556	0.000702201
3	10	POLR2J2	0.324498	-9.3501e-05
3	11	POLR2J2	0.323832	-0.000493756
3	12	POLR2J2	0.323811	-0.000248104
3	13	POLR2J2	0.324181	0.000387719
3	14	POLR2J2	0.323314	-0.000213314
3	15	POLR2J2	0.322141	-0.00111985
3	16	POLR2J2	0.320707	-0.0022879
3	17	POLR2J2	0.320844	-0.00188504
3	18	POLR2J2	0.320453	-0.00201022
3	19	POLR2J2	0.32118	-0.0010171
3	20	POLR2J2	0.323494	0.00156255
3	21	POLR2J2	0.326492	0.0048264
3	22	POLR2J2	0.333161	0.0117615
3	23	POLR2J2	0.346702	0.0255691
3	24	POLR2J2	0.374968	0.0541003
3	25	POLR2J2	0.433597	0.112995
3	26	POLR2J2	0.539927	0.219592
3	27	POLR2J2	0.738014	0.417944
3	28	POLR2J2	1.07066	0.75086
3	29	POLR2J2	1.57426	1.25473
3	30	POLR2J2	2.20069	1.88142
3	31	POLR2J2	2.82043	2.50142
3	32	POLR2J2	3.3048	2.98606
3	33	POLR2J2	3.6208	3.30233
3	34	POLR2J2	3.82782	3.50961
3	35	POLR2J2	3.961	3.64306
3	36	POLR2J2	4.05502	3.73735
3	37	POLR2J2	4.11909	3.80168
3	38	POLR2J2	4.16385	3.84671
3	39	POLR2J2	4.19809	3.88121
3	40	POLR2J2	4.224	3.90739
4	1	GAPDH	0.272136	-0.00363524
4	2	GAPDH	0.273322	-0.0025352
4	3	GAPDH	0.275902	-4.20137e-05
4	4	GAPDH	0.276095	6.3974e-05
4	5	GAPDH	0.276742	0.000624209
4	6	GAPDH	0.277318	0.00111328
4	7	GAPDH	0.278097	0.00180536
4	8	GAPDH	0.276775	0.000397415
4	9	GAPDH	0.275694	-0.000771123
4	10	GAPDH	0.277084	0.000532829
4	11	GAPDH	0.27648	-0.000157979
4	12	GAPDH	0.275108	-0.00161694
4	13	GAPDH	0.274173	-0.00263832
4	14	GAPDH	0.273606	-0.00329276
4	15	GAPDH	0.275917	-0.0010684
4	16	GAPDH	0.277302	0.000229922
4	17	GAPDH	0.277983	0.000824221
4	18	GAPDH	0.277438	0.000192542
4	19	GAPDH	0.281136	0.00380379
4	20	GAPDH	0.288378	0.0109595
4	21	GAPDH	0.303017	0.0255113
4	22	GAPDH	0.330267	0.0526745
4	23	GAPDH	0.385304	0.107625
4	24	GAPDH	0.48993	0.212164
4	25	GAPDH	0.678949	0.401096
4	26	GAPDH	1.00813	0.730189
4	27	GAPDH	1.50561	1.22758
4	28	GAPDH	2.13902	1.86091
4	29	GAPDH	2.78178	2.50358
4	30	GAPDH	3.29013	3.01184
4	31	GAPDH	3.64111	3.36274
4	32	GAPDH	3.86827	3.58981
4	33	GAPDH	4.00742	3.72887
4	34	GAPDH	4.09795	3.81932
4	35	GAPDH	4.16411	3.88539
4	36	GAPDH	4.21814	3.93934
4	37	GAPDH	4.24553	3.96664
4	38	GAPDH	4.2614	3.98242
4	39	GAPDH	4.275	3.99593
4	40	GAPDH	4.30699	4.02783
5	1	GAPDH	0.302653	-0.00163912
5	2	GAPDH	0.3043	9.07967e-05
5	3	GAPDH	0.303895	-0.000231061
5	4	GAPDH	0.303452	-0.000591513
5	5	GAPDH	0.30396	-1.67419e-07
5	6	GAPDH	0.303671	-0.000206452
5	7	GAPDH	0.305705	0.00191003
5	8	GAPDH	0.305724	0.00201267
5	9	GAPDH	0.30474	0.00111113
5	10	GAPDH	0.304192	0.00064658
5	11	GAPDH	0.303061	-0.000402305
5	12	GAPDH	0.301936	-0.00144365
5	13	GAPDH	0.301444	-0.00185322
5	14	GAPDH	0.301387	-0.00182707
5	15	GAPDH	0.301667	-0.00146392
5	16	GAPDH	0.300993	-0.00205513
5	17	GAPDH	0.301784	-0.00118094
5	18	GAPDH	0.30411	0.00122722
5	19	GAPDH	0.307147	0.0043478
5	20	GAPDH	0.313582	0.0108655
5	21	GAPDH	0.327776	0.025142
5	22	GAPDH	0.355261	0.0527106
5	23	GAPDH	0.410176	0.107708
5	24	GAPDH	0.516007	0.213622
5	25	GAPDH	0.709191	0.406889
5	26	GAPDH	1.03785	0.735632
5	27	GAPDH	1.54035	1.23821
5	28	GAPDH	2.17642	1.87437
5	29	GAPDH	2.81299	2.51102
5	30	GAPDH	3.32064	3.01876
5	31	GAPDH	3.67635	3.37455
5	32	GAPDH	3.90003	3.59831
5	33	GAPDH	4.03992	3.73829
5	34	GAPDH	4.13567	3.83411
5	35	GAPDH	4.20335	3.90187
5	36	GAPDH	4.25627	3.95488
5	37	GAPDH	4.29271	3.9914
5	38	GAPDH	4.33005	4.02883
5	39	GAPDH	4.3495	4.04836
5	40	GAPDH	4.36563	4.06458
6	1	GAPDH	0.262051	-0.00218031
6	2	GAPDH	0.262698	-0.00133263
6	3	GAPDH	0.263535	-0.00029592
6	4	GAPDH	0.263804	0.000173506
6	5	GAPDH	0.264291	0.000860995
6	6	GAPDH	0.265131	0.0019017
6	7	GAPDH	0.264908	0.0018793
6	8	GAPDH	0.261938	-0.000890072
6	9	GAPDH	0.261311	-0.00131633
6	10	GAPDH	0.26233	-9.76101e-05
6	11	GAPDH	0.261946	-0.000281332
6	12	GAPDH	0.261579	-0.000447709
6	13	GAPDH	0.261079	-0.000747363
6	14	GAPDH	0.259432	-0.00219351
6	15	GAPDH	0.259308	-0.0021173
6	16	GAPDH	0.259715	-0.00150917
6	17	GAPDH	0.260587	-0.000437173
6	18	GAPDH	0.262168	0.00134442
6	19	GAPDH	0.264797	0.00417356
6	20	GAPDH	0.270154	0.0097315
6	21	GAPDH	0.283423	0.023201
6	22	GAPDH	0.311728	0.0517063
6	23	GAPDH	0.363977	0.104155
6	24	GAPDH	0.462937	0.203316
6	25	GAPDH	0.649576	0.390155
6	26	GAPDH	0.96902	0.7098
6	27	GAPDH	1.45562	1.1966
6	28	GAPDH	2.09257	1.83375
6	29	GAPDH	2.74086	2.48225
6	30	GAPDH	3.26528	3.00686
6	31	GAPDH	3.63023	3.37201
6	32	GAPDH	3.86708	3.60906
6	33	GAPDH	4.01222	3.7544
6	34	GAPDH	4.12245	3.86483
6	35	GAPDH	4.19716	3.93974
6	36	GAPDH	4.25781	4.00059
6	37	GAPDH	4.30041	4.0434
6	38	GAPDH	4.32272	4.06591
6	39	GAPDH	4.34387	4.08726
6	40	GAPDH	4.35372	4.0973
7	1	PABPC1L2B	0.201525	-0.00752739
7	2	PABPC1L2B	0.202659	-0.00592603
7	3	PABPC1L2B	0.206335	-0.00178251
7	4	PABPC1L2B	0.206404	-0.00124584
7	5	PABPC1L2B	0.206041	-0.00114117
7	6	PABPC1L2B	0.205398	-0.00131614
7	7	PABPC1L2B	0.206606	0.000359664
7	8	PABPC1L2B	0.206101	0.000321332
7	9	PABPC1L2B	0.20602	0.000708889
7	10	PABPC1L2B	0.20586	0.00101628
7	11	PABPC1L2B	0.205988	0.00161151
7	12	PABPC1L2B	0.206119	0.00221035
7	13	PABPC1L2B	0.205305	0.00186413
7	14	PABPC1L2B	0.20407	0.00109658
7	15	PABPC1L2B	0.203038	0.000532076
7	16	PABPC1L2B	0.202245	0.000207105
7	17	PABPC1L2B	0.20116	-0.000410645
7	18	PABPC1L2B	0.200798	-0.000304495
7	19	PABPC1L2B	0.200024	-0.000611347
7	20	PABPC1L2B	0.199534	-0.000633586
7	21	PABPC1L2B	0.199423	-0.00027668
7	22	PABPC1L2B	0.198968	-0.000264364
7	23	PABPC1L2B	0.197979	-0.000785419
7	24	PABPC1L2B	0.197752	-0.000545622
7	25	PABPC1L2B	0.197314	-0.000515558
7	26	PABPC1L2B	0.19696	-0.00040245
7	27	PABPC1L2B	0.196423	-0.000471613
7	28	PABPC1L2B	0.196281	-0.000145568
7	29	PABPC1L2B	0.195944	-1.46975e-05
7	30	PABPC1L2B	0.196293	0.000801715
7	31	PABPC1L2B	0.195517	0.000493061
7	32	PABPC1L2B	0.194731	0.00017487
7	33	PABPC1L2B	0.193791	-0.000297757
7	34	PABPC1L2B	0.193046	-0.000575089
7	35	PABPC1L2B	0.193054	-9.96151e-05
7	36	PABPC1L2B	0.192853	0.000167377
7	37	PABPC1L2B	0.192805	0.000587076
7	38	PABPC1L2B	0.192108	0.000357383
7	39	PABPC1L2B	0.190614	-0.000669239
7	40	PABPC1L2B	0.190293	-0.000522693
8	1	PABPC1L2B	0.166867	-0.00670473
8	2	PABPC1L2B	0.168512	-0.00443086
8	3	PABPC1L2B	0.169794	-0.0025188
8	4	PABPC1L2B	0.169838	-0.00184548
8	5	PABPC1L2B	0.170754	-0.000299355
8	6	PABPC1L2B	0.17061	0.000185959
8	7	PABPC1L2B	0.17027	0.00047568
8	8	PABPC1L2B	0.169619	0.000454369
8	9	PABPC1L2B	0.170176	0.00164114
8	10	PABPC1L2B	0.168886	0.0009813
8	11	PABPC1L2B	0.16785	0.000575077
8	12	PABPC1L2B	0.167949	0.00130344
8	13	PABPC1L2B	0.167605	0.00158913
8	14	PABPC1L2B	0.166413	0.0010271
8	15	PABPC1L2B	0.165784	0.00102793
8	16	PABPC1L2B	0.165088	0.000961469
8	17	PABPC1L2B	0.162503	-0.000993998
8	18	PABPC1L2B	0.161469	-0.00139845
8	19	PABPC1L2B	0.162134	-0.000104015
8	20	PABPC1L2B	0.161265	-0.000343136
8	21	PABPC1L2B	0.160272	-0.000706175
8	22	PABPC1L2B	0.160069	-0.000279929
8	23	PABPC1L2B	0.15941	-0.00030875
8	24	PABPC1L2B	0.158293	-0.000796676
8	25	PABPC1L2B	0.157541	-0.000918659
8	26	PABPC1L2B	0.157264	-0.000565861
8	27	PABPC1L2B	0.156861	-0.000339037
8	28	PABPC1L2B	0.1566	2.96897e-05
8	29	PABPC1L2B	0.155837	-0.00010408
8	30	PABPC1L2B	0.155097	-0.000213844
8	31	PABPC1L2B	0.154731	5.00386e-05
8	32	PABPC1L2B	0.155567	0.00151521
8	33	PABPC1L2B	0.154116	0.000693616
8	34	PABPC1L2B	0.15293	0.000137711
8	35	PABPC1L2B	0.151821	-0.000341736
8	36	PABPC1L2B	0.149899	-0.00163361
8	37	PABPC1L2B	0.149783	-0.00112028
8	38	PABPC1L2B	0.151282	0.0010085
8	39	PABPC1L2B	0.150818	0.00117452
8	40	PABPC1L2B	0.15034	0.00132589
9	1	PABPC1L2B	0.251415	-0.00664377
9	2	PABPC1L2B	0.252477	-0.00492773
9	3	PABPC1L2B	0.254362	-0.00238894
9	4	PABPC1L2B	0.254494	-0.00160277
9	5	PABPC1L2B	0.253213	-0.00222872
9	6	PABPC1L2B	0.254121	-0.000666609
9	7	PABPC1L2B	0.255848	0.00171429
9	8	PABPC1L2B	0.254259	0.000778962
9	9	PABPC1L2B	0.252714	-0.000111482
9	10	PABPC1L2B	0.25223	5.90958e-05
9	11	PABPC1L2B	0.250993	-0.000523937
9	12	PABPC1L2B	0.250508	-0.000354939
9	13	PABPC1L2B	0.24946	-0.000748876
9	14	PABPC1L2B	0.249627	7.2406e-05
9	15	PABPC1L2B	0.250568	0.00166756
9	16	PABPC1L2B	0.250046	0.0017994
9	17	PABPC1L2B	0.249002	0.00140968
9	18	PABPC1L2B	0.24793	0.000992571
9	19	PABPC1L2B	0.24754	0.00125652
9	20	PABPC1L2B	0.24638	0.00075066
9	21	PABPC1L2B	0.245681	0.00070617
9	22	PABPC1L2B	0.244352	3.08536e-05
9	23	PABPC1L2B	0.24377	0.000103308
9	24	PABPC1L2B	0.243703	0.000689867
9	25	PABPC1L2B	0.24304	0.000681109
9	26	PABPC1L2B	0.241863	0.000158933
9	27	PABPC1L2B	0.240426	-0.000624313
9	28	PABPC1L2B	0.239929	-0.000467131
9	29	PABPC1L2B	0.241041	0.00129924
9	30	PABPC1L2B	0.240391	0.00130342
9	31	PABPC1L2B	0.238522	8.88307e-05
9	32	PABPC1L2B	0.237075	-0.000704115
9	33	PABPC1L2B	0.23649	-0.000634552
9	34	PABPC1L2B	0.236417	-5.43557e-05
9	35	PABPC1L2B	0.23539	-0.000426418
9	36	PABPC1L2B	0.233977	-0.00118591
9	37	PABPC1L2B	0.233343	-0.00116518
9	38	PABPC1L2B	0.23257	-0.00128455
9	39	PABPC1L2B	0.23281	-0.000390086
9	40	PABPC1L2B	0.234204	0.0016585
10	1	NXF2B	0.554283	-0.00693856
10	2	NXF2B	0.554204	-0.0060749
10	3	NXF2B	0.556196	-0.00314081
10	4	NXF2B	0.556383	-0.00201238
10	5	NXF2B	0.557299	-0.00015421
10	6	NXF2B	0.557062	0.000551563
10	7	NXF2B	0.556428	0.000859594
10	8	NXF2B	0.554904	0.000277429
10	9	NXF2B	0.554404	0.00071957
10	10	NXF2B	0.55361	0.000867502
10	11	NXF2B	0.55268	0.000879775
10	12	NXF2B	0.551434	0.000575964
10	13	NXF2B	0.550251	0.000335512
10	14	NXF2B	0.549648	0.000674359
10	15	NXF2B	0.548547	0.000515983
10	16	NXF2B	0.547524	0.000434855
10	17	NXF2B	0.546482	0.000335011
10	18	NXF2B	0.544964	-0.000241134
10	19	NXF2B	0.543626	-0.000636378
10	20	NXF2B	0.542365	-0.00095515
10	21	NXF2B	0.54251	0.000131496
10	22	NXF2B	0.541585	0.000148537
10	23	NXF2B	0.540171	-0.000322942
10	24	NXF2B	0.539588	3.59311e-05
10	25	NXF2B	0.539012	0.000402136
10	26	NXF2B	0.538777	0.00110999
10	27	NXF2B	0.538054	0.00132856
10	28	NXF2B	0.536355	0.000571752
10	29	NXF2B	0.535633	0.000791687
10	30	NXF2B	0.534647	0.000748348
10	31	NXF2B	0.53152	-0.00143611
10	32	NXF2B	0.530233	-0.0017817
10	33	NXF2B	0.530916	-0.000156171
10	34	NXF2B	0.530293	0.000162827
10	35	NXF2B	0.529291	0.000102799
10	36	NXF2B	0.527784	-0.000461544
10	37	NXF2B	0.525831	-0.00147298
10	38	NXF2B	0.525265	-0.00109605
10	39	NXF2B	0.526726	0.00130637
10	40	NXF2B	0.528425	0.00394769
11	1	NXF2B	0.615562	-0.00667576
11	2	NXF2B	0.617139	-0.00441588
11	3	NXF2B	0.618523	-0.00234912
11	4	NXF2B	0.617796	-0.00239261
11	5	NXF2B	0.618712	-0.00079434
11	6	NXF2B	0.618286	-0.000537058
11	7	NXF2B	0.617806	-0.000334016
11	8	NXF2B	0.619477	0.00201998
11	9	NXF2B	0.617451	0.000677591
11	10	NXF2B	0.616411	0.000320408
11	11	NXF2B	0.615839	0.00043154
11	12	NXF2B	0.615462	0.000736922
11	13	NXF2B	0.61532	0.00127804
11	14	NXF2B	0.614631	0.00127223
11	15	NXF2B	0.61448	0.00180423
11	16	NXF2B	0.61423	0.00223722
11	17	NXF2B	0.614603	0.00329345
11	18	NXF2B	0.614147	0.00352081
11	19	NXF2B	0.609761	-0.00018252
11	20	NXF2B	0.608246	-0.00101404
11	21	NXF2B	0.607504	-0.00107319
11	22	NXF2B	0.605173	-0.00272082
11	23	NXF2B	0.603852	-0.00335898
11	24	NXF2B	0.602268	-0.00426017
11	25	NXF2B	0.602828	-0.00301697
11	26	NXF2B	0.604512	-0.000650337
11	27	NXF2B	0.604802	0.000322677
11	28	NXF2B	0.604778	0.00098241
11	29	NXF2B	0.604506	0.00139258
11	30	NXF2B	0.604824	0.00239408
11	31	NXF2B	0.608953	0.00720635
11	32	NXF2B	0.619455	0.0183915
11	33	NXF2B	0.638128	0.0377466
11	34	NXF2B	0.678406	0.0787079
11	35	NXF2B	0.754225	0.15521
11	36	NXF2B	0.898998	0.300666
11	37	NXF2B	1.16058	0.56293
11	38	NXF2B	1.5763	0.979339
11	39	NXF2B	2.1178	1.52152
11	40	NXF2B	2.59208	1.99648
12	1	NXF2B	0.602571	-0.00475056
12	2	NXF2B	0.603988	-0.00238841
12	3	NXF2B	0.604237	-0.00119315
12	4	NXF2B	0.605216	0.000730907
12	5	NXF2B	0.604387	0.000847689
12	6	NXF2B	0.602864	0.000270493
12	7	NXF2B	0.60252	0.000872576
12	8	NXF2B	0.601424	0.000722328
12	9	NXF2B	0.599981	0.000224288
12	10	NXF2B	0.598251	-0.000559974
12	11	NXF2B	0.597425	-0.000439795
12	12	NXF2B	0.596403	-0.000516013
12	13	NXF2B	0.595828	-0.000145495
12	14	NXF2B	0.594114	-0.000914617
12	15	NXF2B	0.59351	-0.000572649
12	16	NXF2B	0.592981	-0.000155877
12	17	NXF2B	0.592412	0.000220661
12	18	NXF2B	0.591436	0.0001901
12	19	NXF2B	0.590605	0.000305034
12	20	NXF2B	0.589536	0.00018137
12	21	NXF2B	0.588865	0.000456283
12	22	NXF2B	0.587973	0.000510301
12	23	NXF2B	0.586181	-0.000336188
12	24	NXF2B	0.584636	-0.000935556
12	25	NXF2B	0.58297	-0.00165604
12	26	NXF2B	0.582502	-0.00117865
12	27	NXF2B	0.582791	5.5717e-05
12	28	NXF2B	0.582639	0.000850144
12	29	NXF2B	0.58301	0.00216611
12	30	NXF2B	0.589214	0.00931624
12	31	NXF2B	0.599506	0.0205542
12	32	NXF2B	0.616337	0.0383299
12	33	NXF2B	0.650863	0.0738021
12	34	NXF2B	0.716169	0.140054
12	35	NXF2B	0.840895	0.265725
12	36	NXF2B	1.07101	0.496791
12	37	NXF2B	1.4456	0.872319
12	38	NXF2B	1.95309	1.38076
12	39	NXF2B	2.49355	1.92216
12	40	NXF2B	2.90035	2.32991
13	1
13	2
13	3
13	4
13	5
13	6
13	7
13	8
13	9
13	10
13	11
13	12
13	13
13	14
13	15
13	16
13	17
13	18
13	19
13	20
13	21
13	22
13	23
13	24
13	25
13	26
13	27
13	28
13	29
13	30
13	31
13	32
13	33
13	34
13	35
13	36
13	37
13	38
13	39
13	40
14	1
14	2
14	3
14	4
14	5
14	6
14	7
14	8
14	9
14	10
14	11
14	12
14	13
14	14
14	15
14	16
14	17
14	18
14	19
14	20
14	21
14	22
14	23
14	24
14	25
14	26
14	27
14	28
14	29
14	30
14	31
14	32
14	33
14	34
14	35
14	36
14	37
14	38
14	39
14	40
15	1
15	2
15	3
15	4
15	5
15	6
15	7
15	8
15	9
15	10
15	11
15	12
15	13
15	14
15	15
15	16
15	17
15	18
15	19
15	20
15	21
15	22
15	23
15	24
15	25
15	26
15	27
15	28
15	29
15	30
15	31
15	32
15	33
15	34
15	35
15	36
15	37
15	38
15	39
15	40
16	1
16	2
16	3
16	4
16	5
16	6
16	7
16	8
16	9
16	10
16	11
16	12
16	13
16	14
16	15
16	16
16	17
16	18
16	19
16	20
16	21
16	22
16	23
16	24
16	25
16	26
16	27
16	28
16	29
16	30
16	31
16	32
16	33
16	34
16	35
16	36
16	37
16	38
16	39
16	40
17	1
17	2
17	3
17	4
17	5
17	6
17	7
17	8
17	9
17	10
17	11
17	12
17	13
17	14
17	15
17	16
17	17
17	18
17	19
17	20
17	21
17	22
17	23
17	24
17	25
17	26
17	27
17	28
17	29
17	30
17	31
17	32
17	33
17	34
17	35
17	36
17	37
17	38
17	39
17	40
18	1
18	2
18	3
18	4
18	5
18	6
18	7
18	8
18	9
18	10
18	11
18	12
18	13
18	14
18	15
18	16
18	17
18	18
18	19
18	20
18	21
18	22
18	23
18	24
18	25
18	26
18	27
18	28
18	29
18	30
18	31
18	32
18	33
18	34
18	35
18	36
18	37
18	38
18	39
18	40
19	1
19	2
19	3
19	4
19	5
19	6
19	7
19	8
19	9
19	10
19	11
19	12
19	13
19	14
19	15
19	16
19	17
19	18
19	19
19	20
19	21
19	22
19	23
19	24
19	25
19	26
19	27
19	28
19	29
19	30
19	31
19	32
19	33
19	34
19	35
19	36
19	37
19	38
19	39
19	40
20	1
20	2
20	3
20	4
20	5
20	6
20	7
20	8
20	9
20	10
20	11
20	12
20	13
20	14
20	15
20	16
20	17
20	18
20	19
20	20
20	21
20	22
20	23
20	24
20	25
20	26
20	27
20	28
20	29
20	30
20	31
20	32
20	33
20	34
20	35
20	36
20	37
20	38
20	39
20	40
21	1
21	2
21	3
21	4
21	5
21	6
21	7
21	8
21	9
21	10
21	11
21	12
21	13
21	14
21	15
21	16
21	17
21	18
21	19
21	20
21	21
21	22
21	23
21	24
21	25
21	26
21	27
21	28
21	29
21	30
21	31
21	32
21	33
21	34
21	35
21	36
21	37
21	38
21	39
21	40
22	1
22	2
22	3
22	4
22	5
22	6
22	7
22	8
22	9
22	10
22	11
22	12
22	13
22	14
22	15
22	16
22	17
22	18
22	19
22	20
22	21
22	22
22	23
22	24
22	25
22	26
22	27
22	28
22	29
22	30
22	31
22	32
22	33
22	34
22	35
22	36
22	37
22	38
22	39
22	40
23	1
23	2
23	3
23	4
23	5
23	6
23	7
23	8
23	9
23	10
23	11
23	12
23	13
23	14
23	15
23	16
23	17
23	18
23	19
23	20
23	21
23	22
23	23
23	24
23	25
23	26
23	27
23	28
23	29
23	30
23	31
23	32
23	33
23	34
23	35
23	36
23	37
23	38
23	39
23	40
24	1
24	2
24	3
24	4
24	5
24	6
24	7
24	8
24	9
24	10
24	11
24	12
24	13
24	14
24	15
24	16
24	17
24	18
24	19
24	20
24	21
24	22
24	23
24	24
24	25
24	26
24	27
24	28
24	29
24	30
24	31
24	32
24	33
24	34
24	35
24	36
24	37
24	38
24	39
24	40
25	1	POLR2J2	0.263992	-0.00241015
25	2	POLR2J2	0.263949	-0.00199065
25	3	POLR2J2	0.264062	-0.00141492
25	4	POLR2J2	0.263285	-0.00172915
25	5	POLR2J2	0.264228	-0.000324345
25	6	POLR2J2	0.264353	0.00026405
25	7	POLR2J2	0.264953	0.00132612
25	8	POLR2J2	0.264281	0.00111665
25	9	POLR2J2	0.264842	0.00214007
25	10	POLR2J2	0.26381	0.00157017
25	11	POLR2J2	0.262498	0.000720484
25	12	POLR2J2	0.261623	0.00030782
25	13	POLR2J2	0.260337	-0.000515074
25	14	POLR2J2	0.259951	-0.000439189
25	15	POLR2J2	0.259373	-0.000554307
25	16	POLR2J2	0.2585	-0.000964707
25	17	POLR2J2	0.257927	-0.00107571
25	18	POLR2J2	0.257866	-0.000674147
25	19	POLR2J2	0.256562	-0.00151585
25	20	POLR2J2	0.255847	-0.00176826
25	21	POLR2J2	0.257235	8.24391e-05
25	22	POLR2J2	0.260138	0.00344784
25	23	POLR2J2	0.265931	0.00970366
25	24	POLR2J2	0.275649	0.0198835
25	25	POLR2J2	0.294244	0.0389408
25	26	POLR2J2	0.332097	0.0772563
25	27	POLR2J2	0.403992	0.149614
25	28	POLR2J2	0.541154	0.287239
25	29	POLR2J2	0.788143	0.53469
25	30	POLR2J2	1.19493	0.941943
25	31	POLR2J2	1.76734	1.51482
25	32	POLR2J2	2.42438	2.17231
25	33	POLR2J2	3.00697	2.75536
25	34	POLR2J2	3.42186	3.17072
25	35	POLR2J2	3.67079	3.42011
25	36	POLR2J2	3.82477	3.57455
25	37	POLR2J2	3.9239	3.67414
25	38	POLR2J2	3.99035	3.74106
25	39	POLR2J2	4.0392	3.79037
25	40	POLR2J2	4.0777	3.82933
26	1	POLR2J2	0.319506	0.00251696
26	2	POLR2J2	0.318944	0.00259121
26	3	POLR2J2	0.317902	0.00218547
26	4	POLR2J2	0.317081	0.00200023
26	5	POLR2J2	0.316414	0.00196917
26	6	POLR2J2	0.314747	0.000938111
26	7	POLR2J2	0.313079	-9.4553e-05
26	8	POLR2J2	0.312165	-0.000371669
26	9	POLR2J2	0.309813	-0.00208794
26	10	POLR2J2	0.309096	-0.00216896
26	11	POLR2J2	0.309884	-0.000744866
26	12	POLR2J2	0.309145	-0.000848115
26	13	POLR2J2	0.309055	-0.000302269
26	14	POLR2J2	0.30809	-0.000631062
26	15	POLR2J2	0.306557	-0.00152905
26	16	POLR2J2	0.306071	-0.00137874
26	17	POLR2J2	0.305403	-0.00141052
26	18	POLR2J2	0.304937	-0.00124099
26	19	POLR2J2	0.304525	-0.00101698
26	20	POLR2J2	0.303435	-0.00147101
26	21	POLR2J2	0.304299	2.94084e-05
26	22	POLR2J2	0.306986	0.00335244
26	23	POLR2J2	0.30782	0.00482189
26	24	POLR2J2	0.314884	0.0125217
26	25	POLR2J2	0.326498	0.0247721
26	26	POLR2J2	0.349825	0.0487345
26	27	POLR2J2	0.396607	0.0961529
26	28	POLR2J2	0.484959	0.18514
26	29	POLR2J2	0.65149	0.352307
26	30	POLR2J2	0.940718	0.642171
26	31	POLR2J2	1.39799	1.10008
26	32	POLR2J2	2.01115	1.71388
26	33	POLR2J2	2.66568	2.36904
26	34	POLR2J2	3.21831	2.92231
26	35	POLR2J2	3.59961	3.30424
26	36	POLR2J2	3.83872	3.54399
26	37	POLR2J2	3.98626	3.69217
26	38	POLR2J2	4.08275	3.78929
26	39	POLR2J2	4.16339	3.87057
26	40	POLR2J2	4.22413	3.93195
27	1	POLR2J2	0.228951	0.000659126
27	2	POLR2J2	0.228597	0.000813968
27	3	POLR2J2	0.228081	0.000805999
27	4	POLR2J2	0.227917	0.00115031
27	5	POLR2J2	0.227183	0.00092459
27	6	POLR2J2	0.226243	0.000492773
27	7	POLR2J2	0.225331	8.88361e-05
27	8	POLR2J2	0.224697	-3.64194e-05
27	9	POLR2J2	0.224084	-0.00014132
27	10	POLR2J2	0.223158	-0.000559592
27	11	POLR2J2	0.222693	-0.000515719
27	12	POLR2J2	0.22212	-0.00058055
27	13	POLR2J2	0.220923	-0.00126996
27	14	POLR2J2	0.221005	-0.000679546
27	15	POLR2J2	0.221002	-0.000173842
27	16	POLR2J2	0.219693	-0.000974478
27	17	POLR2J2	0.218245	-0.00191433
27	18	POLR2J2	0.217783	-0.00186808
27	19	POLR2J2	0.218255	-0.000887846
27	20	POLR2J2	0.219337	0.000702275
27	21	POLR2J2	0.219945	0.00181882
27	22	POLR2J2	0.221236	0.00361808
27	23	POLR2J2	0.224836	0.00772555
27	24	POLR2J2	0.232385	0.0157829
27	25	POLR2J2	0.249732	0.0336387
27	26	POLR2J2	0.284104	0.0685185
27	27	POLR2J2	0.350836	0.135759
27	28	POLR2J2	0.475533	0.260964
27	29	POLR2J2	0.698947	0.484886
27	30	POLR2J2	1.07461	0.861056
27	31	POLR2J2	1.62011	1.40707
27	32	POLR2J2	2.26906	2.05653
27	33	POLR2J2	2.883	2.67098
27	34	POLR2J2	3.33121	3.11969
27	35	POLR2J2	3.62726	3.41625
27	36	POLR2J2	3.80879	3.59829
27	37	POLR2J2	3.92296	3.71297
27	38	POLR2J2	4.00427	3.79478
27	39	POLR2J2	4.07093	3.86196
27	40	POLR2J2	4.11524	3.90677
28	1	GAPDH	0.275606	0.00192844
28	2	GAPDH	0.275082	0.00211079
28	3	GAPDH	0.273785	0.00151929
28	4	GAPDH	0.272536	0.000977143
28	5	GAPDH	0.272079	0.00122613
28	6	GAPDH	0.270595	0.000448965
28	7	GAPDH	0.269347	-9.2912e-05
28	8	GAPDH	0.268527	-0.000206708
28	9	GAPDH	0.267115	-0.000912915
28	10	GAPDH	0.266023	-0.00129842
28	11	GAPDH	0.265665	-0.000949981
28	12	GAPDH	0.264157	-0.00175185
28	13	GAPDH	0.263251	-0.00195136
28	14	GAPDH	0.263895	-0.000601624
28	15	GAPDH	0.263489	-0.000301376
28	16	GAPDH	0.262073	-0.00101104
28	17	GAPDH	0.261939	-0.000438459
28	18	GAPDH	0.263602	0.00193016
28	19	GAPDH	0.26438	0.00341496
28	20	GAPDH	0.266666	0.00640731
28	21	GAPDH	0.27311	0.0135572
28	22	GAPDH	0.286662	0.0278149
28	23	GAPDH	0.31232	0.0541798
28	24	GAPDH	0.36286	0.105426
28	25	GAPDH	0.461954	0.205226
28	26	GAPDH	0.642205	0.386184
28	27	GAPDH	0.956432	0.701117
28	28	GAPDH	1.44369	1.18908
28	29	GAPDH	2.07467	1.82076
28	30	GAPDH	2.73135	2.47816
28	31	GAPDH	3.27555	3.02306
28	32	GAPDH	3.6508	3.39901
28	33	GAPDH	3.89202	3.64094
28	34	GAPDH	4.05571	3.80534
28	35	GAPDH	4.16876	3.9191
28	36	GAPDH	4.24824	3.99928
28	37	GAPDH	4.30597	4.05772
28	38	GAPDH	4.33162	4.08407
28	39	GAPDH	4.36524	4.1184
28	40	GAPDH	4.39228	4.14614
29	1	GAPDH	0.300652	0.00123008
29	2	GAPDH	0.300567	0.00213048
29	3	GAPDH	0.299364	0.00191317
29	4	GAPDH	0.297836	0.00137102
29	5	GAPDH	0.295838	0.000357717
29	6	GAPDH	0.294706	0.000211605
29	7	GAPDH	0.294265	0.000756222
29	8	GAPDH	0.291698	-0.000825766
29	9	GAPDH	0.290227	-0.00131139
29	10	GAPDH	0.289422	-0.0011311
29	11	GAPDH	0.288774	-0.000792957
29	12	GAPDH	0.287432	-0.00115016
29	13	GAPDH	0.286356	-0.00124054
29	14	GAPDH	0.286412	-0.000199327
29	15	GAPDH	0.284932	-0.000694096
29	16	GAPDH	0.283562	-0.001078
29	17	GAPDH	0.282256	-0.00139863
29	18	GAPDH	0.282363	-0.000305924
29	19	GAPDH	0.283518	0.00183404
29	20	GAPDH	0.284383	0.00368412
29	21	GAPDH	0.288426	0.00871294
29	22	GAPDH	0.297468	0.0187402
29	23	GAPDH	0.316722	0.0389799
29	24	GAPDH	0.354555	0.077798
29	25	GAPDH	0.425577	0.149805
29	26	GAPDH	0.557229	0.282443
29	27	GAPDH	0.789496	0.515696
29	28	GAPDH	1.15217	0.87936
29	29	GAPDH	1.6402	1.36837
29	30	GAPDH	2.17326	1.90242
29	31	GAPDH	2.63106	2.3612
29	32	GAPDH	2.95095	2.68208
29	33	GAPDH	3.14966	2.88177
29	34	GAPDH	3.28029	3.01338
29	35	GAPDH	3.36781	3.1019
29	36	GAPDH	3.42245	3.15752
29	37	GAPDH	3.46272	3.19878
29	38	GAPDH	3.49236	3.22939
29	39	GAPDH	3.51543	3.25345
29	40	GAPDH	3.5292	3.26821
30	1	GAPDH	0.270187	-0.000305801
30	2	GAPDH	0.270133	0.000619912
30	3	GAPDH	0.269085	0.000550586
30	4	GAPDH	0.267649	9.42173e-05
30	5	GAPDH	0.266251	-0.00032472
30	6	GAPDH	0.265635	3.83557e-05
30	7	GAPDH	0.264724	0.000105882
30	8	GAPDH	0.263578	-6.06596e-05
30	9	GAPDH	0.263147	0.000487906
30	10	GAPDH	0.261455	-0.000225419
30	11	GAPDH	0.260304	-0.000397563
30	12	GAPDH	0.259572	-0.000149882
30	13	GAPDH	0.25849	-0.000253332
30	14	GAPDH	0.257468	-0.000295389
30	15	GAPDH	0.256648	-0.000136876
30	16	GAPDH	0.255663	-0.000142276
30	17	GAPDH	0.254195	-0.000631189
30	18	GAPDH	0.253682	-0.000165475
30	19	GAPDH	0.254374	0.00150583
30	20	GAPDH	0.257749	0.00585974
30	21	GAPDH	0.264798	0.0138882
30	22	GAPDH	0.279235	0.0293038
30	23	GAPDH	0.30749	0.0585381
30	24	GAPDH	0.36107	0.113097
30	25	GAPDH	0.464537	0.217543
30	26	GAPDH	0.654894	0.40888
30	27	GAPDH	0.979448	0.734413
30	28	GAPDH	1.47862	1.23456
30	29	GAPDH	2.12107	1.87799
30	30	GAPDH	2.77468	2.53258
30	31	GAPDH	3.30412	3.063
30	32	GAPDH	3.67233	3.4322
30	33	GAPDH	3.90843	3.66927
30	34	GAPDH	4.06272	3.82454
30	35	GAPDH	4.16403	3.92683
30	36	GAPDH	4.23998	4.00376
30	37	GAPDH	4.3016	4.06636
30	38	GAPDH	4.33909	4.10483
30	39	GAPDH	4.36952	4.13623
30	40	GAPDH	4.39443	4.16212
31	1	PABPC1L2B	0.251094	0.00106469
31	2	PABPC1L2B	0.250491	0.00115085
31	3	PABPC1L2B	0.250756	0.00210554
31	4	PABPC1L2B	0.249748	0.00178658
31	5	PABPC1L2B	0.247836	0.000563453
31	6	PABPC1L2B	0.246629	4.48806e-05
31	7	PABPC1L2B	0.246748	0.000853421
31	8	PABPC1L2B	0.246219	0.00101318
31	9	PABPC1L2B	0.244881	0.000364281
31	10	PABPC1L2B	0.244508	0.000680635
31	11	PABPC1L2B	0.243799	0.000660268
31	12	PABPC1L2B	0.242884	0.00043431
31	13	PABPC1L2B	0.241247	-0.000513401
31	14	PABPC1L2B	0.240228	-0.000842833
31	15	PABPC1L2B	0.240438	5.59932e-05
31	16	PABPC1L2B	0.239496	-0.000197458
31	17	PABPC1L2B	0.237821	-0.00118332
31	18	PABPC1L2B	0.236136	-0.00217858
31	19	PABPC1L2B	0.234703	-0.00292281
31	20	PABPC1L2B	0.234249	-0.00268816
31	21	PABPC1L2B	0.236162	-8.56845e-05
31	22	PABPC1L2B	0.236129	0.000570223
31	23	PABPC1L2B	0.234002	-0.000867796
31	24	PABPC1L2B	0.232523	-0.00165736
31	25	PABPC1L2B	0.23128	-0.00221167
31	26	PABPC1L2B	0.230636	-0.00216641
31	27	PABPC1L2B	0.231311	-0.000802502
31	28	PABPC1L2B	0.23159	0.000165942
31	29	PABPC1L2B	0.230519	-0.000216181
31	30	PABPC1L2B	0.229822	-0.000223896
31	31	PABPC1L2B	0.230389	0.00103229
31	32	PABPC1L2B	0.229805	0.00113684
31	33	PABPC1L2B	0.228669	0.000689986
31	34	PABPC1L2B	0.228098	0.000807961
31	35	PABPC1L2B	0.228458	0.00185662
31	36	PABPC1L2B	0.228138	0.00222651
31	37	PABPC1L2B	0.226599	0.00137587
31	38	PABPC1L2B	0.225346	0.000812503
31	39	PABPC1L2B	0.223365	-0.000479232
31	40	PABPC1L2B	0.222824	-0.000331811
32	1	PABPC1L2B	0.277028	-0.00161897
32	2	PABPC1L2B	0.276773	-0.00100808
32	3	PABPC1L2B	0.276421	-0.000494129
32	4	PABPC1L2B	0.276292	0.000242829
32	5	PABPC1L2B	0.274716	-0.000466519
32	6	PABPC1L2B	0.274586	0.000269128
32	7	PABPC1L2B	0.27444	0.000989605
32	8	PABPC1L2B	0.273429	0.000844296
32	9	PABPC1L2B	0.273388	0.00166884
32	10	PABPC1L2B	0.271472	0.000618943
32	11	PABPC1L2B	0.270138	0.000151113
32	12	PABPC1L2B	0.270218	0.00109639
32	13	PABPC1L2B	0.268931	0.000675438
32	14	PABPC1L2B	0.268027	0.000637506
32	15	PABPC1L2B	0.267238	0.000714343
32	16	PABPC1L2B	0.265593	-6.46533e-05
32	17	PABPC1L2B	0.263277	-0.00151399
32	18	PABPC1L2B	0.262043	-0.00188219
32	19	PABPC1L2B	0.261233	-0.00182685
32	20	PABPC1L2B	0.261411	-0.000782685
32	21	PABPC1L2B	0.260572	-0.000755767
32	22	PABPC1L2B	0.259605	-0.000857148
32	23	PABPC1L2B	0.259596	3.6085e-07
32	24	PABPC1L2B	0.258744	1.3987e-05
32	25	PABPC1L2B	0.258234	0.000370042
32	26	PABPC1L2B	0.256713	-0.000284709
32	27	PABPC1L2B	0.254225	-0.00190675
32	28	PABPC1L2B	0.253204	-0.00206223
32	29	PABPC1L2B	0.253008	-0.00139232
32	30	PABPC1L2B	0.253675	0.000140894
32	31	PABPC1L2B	0.254264	0.00159609
32	32	PABPC1L2B	0.251863	6.07387e-05
32	33	PABPC1L2B	0.250373	-0.000563107
32	34	PABPC1L2B	0.250536	0.000466004
32	35	PABPC1L2B	0.249375	0.000170609
32	36	PABPC1L2B	0.248639	0.000300494
32	37	PABPC1L2B	0.248185	0.000712712
32	38	PABPC1L2B	0.24782	0.00121323
32	39	PABPC1L2B	0.24764	0.00189945
32	40	PABPC1L2B	0.248191	0.00331596
33	1	PABPC1L2B	0.21915	-0.0028825
33	2	PABPC1L2B	0.21972	-0.00145256
33	3	PABPC1L2B	0.219376	-0.000935919
33	4	PABPC1L2B	0.218879	-0.0005721
33	5	PABPC1L2B	0.218565	-2.52947e-05
33	6	PABPC1L2B	0.219311	0.00158147
33	7	PABPC1L2B	0.218984	0.00211445
33	8	PABPC1L2B	0.217003	0.000994741
33	9	PABPC1L2B	0.215368	0.000219917
33	10	PABPC1L2B	0.214735	0.000447808
33	11	PABPC1L2B	0.214026	0.000599121
33	12	PABPC1L2B	0.213338	0.000771654
33	13	PABPC1L2B	0.211981	0.000275959
33	14	PABPC1L2B	0.210395	-0.000449631
33	15	PABPC1L2B	0.209602	-0.000381824
33	16	PABPC1L2B	0.208889	-0.000234727
33	17	PABPC1L2B	0.20762	-0.0006434
33	18	PABPC1L2B	0.206871	-0.000531261
33	19	PABPC1L2B	0.206509	-3.28104e-05
33	20	PABPC1L2B	0.205908	0.000226358
33	21	PABPC1L2B	0.204772	-4.81295e-05
33	22	PABPC1L2B	0.203501	-0.000458962
33	23	PABPC1L2B	0.202525	-0.000574052
33	24	PABPC1L2B	0.201161	-0.00107797
33	25	PABPC1L2B	0.200254	-0.00112395
33	26	PABPC1L2B	0.199955	-0.000562989
33	27	PABPC1L2B	0.198928	-0.000728891
33	28	PABPC1L2B	0.197863	-0.000933224
33	29	PABPC1L2B	0.197165	-0.000771048
33	30	PABPC1L2B	0.196295	-0.000779877
33	31	PABPC1L2B	0.194394	-0.00182042
33	32	PABPC1L2B	0.193785	-0.00156858
33	33	PABPC1L2B	0.193452	-0.00104107
33	34	PABPC1L2B	0.193395	-0.000237536
33	35	PABPC1L2B	0.193688	0.000915687
33	36	PABPC1L2B	0.1927	0.000788379
33	37	PABPC1L2B	0.19237	0.00131897
33	38	PABPC1L2B	0.19231	0.00212006
33	39	PABPC1L2B	0.192489	0.00315909
33	40	PABPC1L2B	0.192987	0.00451771
34	1	NXF2B	0.593758	-0.00367197
34	2	NXF2B	0.594221	-0.00206379
34	3	NXF2B	0.593493	-0.00164717
34	4	NXF2B	0.593411	-0.000583239
34	5	NXF2B	0.592906	5.66022e-05
34	6	NXF2B	0.593042	0.00133701
34	7	NXF2B	0.591874	0.00131483
34	8	NXF2B	0.590503	0.00108826
34	9	NXF2B	0.588512	0.000242929
34	10	NXF2B	0.586386	-0.000738356
34	11	NXF2B	0.58556	-0.000419545
34	12	NXF2B	0.584252	-0.000582519
34	13	NXF2B	0.583538	-0.000151055
34	14	NXF2B	0.583569	0.00102511
34	15	NXF2B	0.582287	0.000888243
34	16	NXF2B	0.580216	-3.78488e-05
34	17	NXF2B	0.578751	-0.000358357
34	18	NXF2B	0.578391	0.000426801
34	19	NXF2B	0.577325	0.000506478
34	20	NXF2B	0.575763	8.95291e-05
34	21	NXF2B	0.574009	-0.000519645
34	22	NXF2B	0.57427	0.000886117
34	23	NXF2B	0.572125	-0.000113348
34	24	NXF2B	0.568284	-0.00280994
34	25	NXF2B	0.566928	-0.00302012
34	26	NXF2B	0.568612	-0.000191234
34	27	NXF2B	0.568389	0.000730597
34	28	NXF2B	0.567698	0.00118471
34	29	NXF2B	0.566637	0.0012688
34	30	NXF2B	0.564664	0.000440578
34	31	NXF2B	0.562027	-0.00105104
34	32	NXF2B	0.561071	-0.000862706
34	33	NXF2B	0.560721	-6.69987e-05
34	34	NXF2B	0.560109	0.000466389
34	35	NXF2B	0.558621	0.000123171
34	36	NXF2B	0.557492	0.000139429
34	37	NXF2B	0.556301	9.35194e-05
34	38	NXF2B	0.555448	0.000384674
34	39	NXF2B	0.554377	0.000459344
34	40	NXF2B	0.554134	0.00136097
35	1	NXF2B	0.576568	-0.00301893
35	2	NXF2B	0.576704	-0.00181354
35	3	NXF2B	0.578351	0.000902298
35	4	NXF2B	0.577224	0.000845148
35	5	NXF2B	0.577727	0.00241735
35	6	NXF2B	0.576692	0.00245098
35	7	NXF2B	0.573894	0.000722932
35	8	NXF2B	0.571878	-0.000224115
35	9	NXF2B	0.57177	0.000737557
35	10	NXF2B	0.570312	0.000348409
35	11	NXF2B	0.56864	-0.000253527
35	12	NXF2B	0.567478	-0.000346619
35	13	NXF2B	0.566904	0.000149064
35	14	NXF2B	0.565536	-0.000150021
35	15	NXF2B	0.563965	-0.000651821
35	16	NXF2B	0.563074	-0.000473354
35	17	NXF2B	0.563154	0.000676073
35	18	NXF2B	0.562424	0.00101494
35	19	NXF2B	0.561334	0.000994085
35	20	NXF2B	0.558741	-0.000528922
35	21	NXF2B	0.55643	-0.00177125
35	22	NXF2B	0.556768	-0.000363676
35	23	NXF2B	0.554645	-0.00141759
35	24	NXF2B	0.5517	-0.00329257
35	25	NXF2B	0.550212	-0.00371122
35	26	NXF2B	0.550338	-0.00251637
35	27	NXF2B	0.55076	-0.00102511
35	28	NXF2B	0.549671	-0.00104418
35	29	NXF2B	0.548793	-0.000852834
35	30	NXF2B	0.546411	-0.0021655
35	31	NXF2B	0.544465	-0.00304251
35	32	NXF2B	0.544261	-0.00217745
35	33	NXF2B	0.544412	-0.000956801
35	34	NXF2B	0.543842	-0.000458137
35	35	NXF2B	0.544181	0.000950153
35	36	NXF2B	0.544195	0.00203407
35	37	NXF2B	0.542967	0.00187554
35	38	NXF2B	0.543884	0.00386157
35	39	NXF2B	0.546396	0.00744341
35	40	NXF2B	0.549277	0.0113932
36	1	NXF2B	0.534182	-0.00238807
36	2	NXF2B	0.533395	-0.00200619
36	3	NXF2B	0.533305	-0.000926686
36	4	NXF2B	0.533111	4.83863e-05
36	5	NXF2B	0.532025	0.000131773
36	6	NXF2B	0.530951	0.000226067
36	7	NXF2B	0.532128	0.00257216
36	8	NXF2B	0.531241	0.00285445
36	9	NXF2B	0.529724	0.00250672
36	10	NXF2B	0.528139	0.00209038
36	11	NXF2B	0.524341	-0.000538723
36	12	NXF2B	0.522642	-0.00106849
36	13	NXF2B	0.522516	-2.54082e-05
36	14	NXF2B	0.5211	-0.000272351
36	15	NXF2B	0.520159	-4.4423e-05
36	16	NXF2B	0.518575	-0.000459629
36	17	NXF2B	0.514549	-0.00331684
36	18	NXF2B	0.513198	-0.00349828
36	19	NXF2B	0.513993	-0.0015346
36	20	NXF2B	0.513256	-0.00110265
36	21	NXF2B	0.512087	-0.00110235
36	22	NXF2B	0.512439	0.000418762
36	23	NXF2B	0.512357	0.00150559
36	24	NXF2B	0.51082	0.00113801
36	25	NXF2B	0.508898	0.000384428
36	26	NXF2B	0.50761	0.000265874
36	27	NXF2B	0.505515	-0.000660442
36	28	NXF2B	0.502624	-0.00238188
36	29	NXF2B	0.501512	-0.00232484
36	30	NXF2B	0.501611	-0.00105675
36	31	NXF2B	0.500986	-0.000513519
36	32	NXF2B	0.500141	-0.000189449
36	33	NXF2B	0.499054	-0.000106598
36	34	NXF2B	0.498243	0.00025085
36	35	NXF2B	0.497357	0.00053418
36	36	NXF2B	0.496605	0.000950876
36	37	NXF2B	0.495408	0.000922802
36	38	NXF2B	0.495135	0.00181908
36	39	NXF2B	0.49465	0.00250352
36	40	NXF2B	0.49441	0.00343204
37	1
37	2
37	3
37	4
37	5
37	6
37	7
37	8
37	9
37	10
37	11
37	12
37	13
37	14
37	15
37	16
37	17
37	18
37	19
37	20
37	21
37	22
37	23
37	24
37	25
37	26
37	27
37	28
37	29
37	30
37	31
37	32
37	33
37	34
37	35
37	36
37	37
37	38
37	39
37	40
38	1
38	2
38	3
38	4
38	5
38	6
38	7
38	8
38	9
38	10
38	11
38	12
38	13
38	14
38	15
38	16
38	17
38	18
38	19
38	20
38	21
38	22
38	23
38	24
38	25
38	26
38	27
38	28
38	29
38	30
38	31
38	32
38	33
38	34
38	35
38	36
38	37
38	38
38	39
38	40
39	1
39	2
39	3
39	4
39	5
39	6
39	7
39	8
39	9
39	10
39	11
39	12
39	13
39	14
39	15
39	16
39	17
39	18
39	19
39	20
39	21
39	22
39	23
39	24
39	25
39	26
39	27
39	28
39	29
39	30
39	31
39	32
39	33
39	34
39	35
39	36
39	37
39	38
39	39
39	40
40	1
40	2
40	3
40	4
40	5
40	6
40	7
40	8
40	9
40	10
40	11
40	12
40	13
40	14
40	15
40	16
40	17
40	18
40	19
40	20
40	21
40	22
40	23
40	24
40	25
40	26
40	27
40	28
40	29
40	30
40	31
40	32
40	33
40	34
40	35
40	36
40	37
40	38
40	39
40	40
41	1
41	2
41	3
41	4
41	5
41	6
41	7
41	8
41	9
41	10
41	11
41	12
41	13
41	14
41	15
41	16
41	17
41	18
41	19
41	20
41	21
41	22
41	23
41	24
41	25
41	26
41	27
41	28
41	29
41	30
41	31
41	32
41	33
41	34
41	35
41	36
41	37
41	38
41	39
41	40
42	1
42	2
42	3
42	4
42	5
42	6
42	7
42	8
42	9
42	10
42	11
42	12
42	13
42	14
42	15
42	16
42	17
42	18
42	19
42	20
42	21
42	22
42	23
42	24
42	25
42	26
42	27
42	28
42	29
42	30
42	31
42	32
42	33
42	34
42	35
42	36
42	37
42	38
42	39
42	40
43	1
43	2
43	3
43	4
43	5
43	6
43	7
43	8
43	9
43	10
43	11
43	12
43	13
43	14
43	15
43	16
43	17
43	18
43	19
43	20
43	21
43	22
43	23
43	24
43	25
43	26
43	27
43	28
43	29
43	30
43	31
43	32
43	33
43	34
43	35
43	36
43	37
43	38
43	39
43	40
44	1
44	2
44	3
44	4
44	5
44	6
44	7
44	8
44	9
44	10
44	11
44	12
44	13
44	14
44	15
44	16
44	17
44	18
44	19
44	20
44	21
44	22
44	23
44	24
44	25
44	26
44	27
44	28
44	29
44	30
44	31
44	32
44	33
44	34
44	35
44	36
44	37
44	38
44	39
44	40
45	1
45	2
45	3
45	4
45	5
45	6
45	7
45	8
45	9
45	10
45	11
45	12
45	13
45	14
45	15
45	16
45	17
45	18
45	19
45	20
45	21
45	22
45	23
45	24
45	25
45	26
45	27
45	28
45	29
45	30
45	31
45	32
45	33
45	34
45	35
45	36
45	37
45	38
45	39
45	40
46	1
46	2
46	3
46	4
46	5
46	6
46	7
46	8
46	9
46	10
46	11
46	12
46	13
46	14
46	15
46	16
46	17
46	18
46	19
46	20
46	21
46	22
46	23
46	24
46	25
46	26
46	27
46	28
46	29
46	30
46	31
46	32
46	33
46	34
46	35
46	36
46	37
46	38
46	39
46	40
47	1
47	2
47	3
47	4
47	5
47	6
47	7
47	8
47	9
47	10
47	11
47	12
47	13
47	14
47	15
47	16
47	17
47	18
47	19
47	20
47	21
47	22
47	23
47	24
47	25
47	26
47	27
47	28
47	29
47	30
47	31
47	32
47	33
47	34
47	35
47	36
47	37
47	38
47	39
47	40
48	1
48	2
48	3
48	4
48	5
48	6
48	7
48	8
48	9
48	10
48	11
48	12
48	13
48	14
48	15
48	16
48	17
48	18
48	19
48	20
48	21
48	22
48	23
48	24
48	25
48	26
48	27
48	28
48	29
48	30
48	31
48	32
48	33
48	34
48	35
48	36
48	37
48	38
48	39
48	40
49	1	POLR2J2	0.345741	-0.00250478
49	2	POLR2J2	0.346756	-0.0021012
49	3	POLR2J2	0.348788	-0.000679929
49	4	POLR2J2	0.350715	0.000635755
49	5	POLR2J2	0.351838	0.00114713
49	6	POLR2J2	0.353406	0.00210423
49	7	POLR2J2	0.354089	0.00217594
49	8	POLR2J2	0.35314	0.000615222
49	9	POLR2J2	0.352195	-0.000940996
49	10	POLR2J2	0.353079	-0.000668483
49	11	POLR2J2	0.351769	-0.00258888
49	12	POLR2J2	0.352096	-0.00287341
49	13	POLR2J2	0.35366	-0.00192057
49	14	POLR2J2	0.354819	-0.00137295
49	15	POLR2J2	0.355331	-0.0014721
49	16	POLR2J2	0.35686	-0.000554398
49	17	POLR2J2	0.358872	0.00084646
49	18	POLR2J2	0.364184	0.00554697
49	19	POLR2J2	0.368294	0.00904588
49	20	POLR2J2	0.383238	0.0233778
49	21	POLR2J2	0.408505	0.0480341
49	22	POLR2J2	0.46178	0.100698
49	23	POLR2J2	0.563496	0.201803
49	24	POLR2J2	0.750134	0.387829
49	25	POLR2J2	1.06826	0.705343
49	26	POLR2J2	1.55225	1.18872
49	27	POLR2J2	2.16792	1.80378
49	28	POLR2J2	2.78868	2.42393
49	29	POLR2J2	3.29294	2.92758
49	30	POLR2J2	3.63475	3.26877
49	31	POLR2J2	3.85276	3.48618
49	32	POLR2J2	3.99614	3.62895
[truncated: 13,408 more rows]

## Sheet: Results
Block Type	384-Well Block
Calibration Background is expired	No
Calibration Background performed on	07-08-2021
Calibration Normalization FAM-ROX is expired	Yes
Calibration Normalization FAM-ROX performed on	11-06-2019
Calibration Normalization VIC-ROX is expired	Yes
Calibration Normalization VIC-ROX performed on	11-06-2019
Calibration Pure Dye ABY is expired	No
Calibration Pure Dye ABY performed on	07-08-2021
Calibration Pure Dye CY5 is expired	No
Calibration Pure Dye CY5 performed on	07-08-2021
Calibration Pure Dye FAM is expired	No
Calibration Pure Dye FAM performed on	07-08-2021
Calibration Pure Dye JUN is expired	No
Calibration Pure Dye JUN performed on	07-08-2021
Calibration Pure Dye MUSTANG PURPLE is expired	No
Calibration Pure Dye MUSTANG PURPLE performed on	07-08-2021
Calibration Pure Dye NED is expired	No
Calibration Pure Dye NED performed on	07-08-2021
Calibration Pure Dye ROX is expired	No
Calibration Pure Dye ROX performed on	07-08-2021
Calibration Pure Dye SYBR is expired	No
Calibration Pure Dye SYBR performed on	07-08-2021
Calibration Pure Dye TAMRA is expired	No
Calibration Pure Dye TAMRA performed on	07-08-2021
Calibration Pure Dye VIC is expired	No
Calibration Pure Dye VIC performed on	07-08-2021
Calibration ROI is expired	No
Calibration ROI performed on	07-08-2021
Calibration Uniformity is expired	No
Calibration Uniformity performed on	07-08-2021
Chemistry	SYBR_GREEN
Date Created	2021-07-17 06:55:48 AM GMT+08:00
Experiment Barcode
Experiment Comment
Experiment File Name	C:\Users\Administrator\Desktop\2021-07-17 065544.eds
Experiment Name	2021-07-17 065544
Experiment Run End Time	2021-07-18 04:47:10 AM GMT+08:00
Experiment Type	Comparative Cт (ΔΔCт)
Instrument Name	278860858
Instrument Serial Number	278860858
Instrument Type	QuantStudio(TM) 6 Flex System
Passive Reference	ROX
Quantification Cycle Method	Ct
Signal Smoothing On	true
Stage/ Cycle where Analysis is performed	Stage 2, Step 2
User Name
Well	Well Position	Omit	Sample Name	Target Name	Task	Reporter	Quencher	Quantity	Quantity Mean	Quantity SD	RQ	RQ Min	RQ Max	CT	Ct Mean	Ct SD	Delta Ct	Delta Ct Mean	Delta Ct SE	Delta Ct SE	Delta Delta Ct	Tm1	Automatic Ct Threshold	Tm2	Ct Threshold	Tm3	Automatic Baseline	Baseline Start	Baseline End	Comments	Amp Score	Cq Conf	HIGHSD	NOAMP	EXPFAIL	MTP
4	A4	false	1N	GAPDH	UNKNOWN	SYBR	None				1	0.883448	1.13193	24.9481	24.9518	0.0217421		-2.09877	0.0643928	0.0643928	0	83.1434	true		0.390989		true	1	40				N	N	N	N
5	A5	false	1N	GAPDH	UNKNOWN	SYBR	None				1	0.883448	1.13193	24.9322	24.9518	0.0217421		-2.09877	0.0643928	0.0643928	0	83.1434	true		0.390989		true	1	40				N	N	N	N
6	A6	false	1N	GAPDH	UNKNOWN	SYBR	None				1	0.883448	1.13193	24.9752	24.9518	0.0217421		-2.09877	0.0643928	0.0643928	0	83.1434	true		0.390989		true	1	40				N	N	N	N
124	F4	false	1T	GAPDH	UNKNOWN	SYBR	None				3.17818	2.84063	3.55584	19.905	19.8616	0.0533242		-3.76697	0.0583441	0.0583441	-1.6682	83.1434	true		0.390989		true	1	40				N	N	N	N
125	F5	false	1T	GAPDH	UNKNOWN	SYBR	None				3.17818	2.84063	3.55584	19.8777	19.8616	0.0533242		-3.76697	0.0583441	0.0583441	-1.6682	83.1434	true		0.390989		true	1	40				N	N	N	N
126	F6	false	1T	GAPDH	UNKNOWN	SYBR	None				3.17818	2.84063	3.55584	19.8021	19.8616	0.0533242		-3.76697	0.0583441	0.0583441	-1.6682	83.1434	true		0.390989		true	1	40				N	N	N	N
28	B4	false	2N	GAPDH	UNKNOWN	SYBR	None				1.59194	0.939613	2.69715	25.9876	26.139	0.318502		-2.76956	0.273965	0.273965	-0.670788	83.1434	true		0.390989		true	1	40				N	N	N	N
29	B5	false	2N	GAPDH	UNKNOWN	SYBR	None				1.59194	0.939613	2.69715	26.505	26.139	0.318502		-2.76956	0.273965	0.273965	-0.670788	83.0082	true		0.390989		true	1	40				N	N	N	N
30	B6	false	2N	GAPDH	UNKNOWN	SYBR	None				1.59194	0.939613	2.69715	25.9245	26.139	0.318502		-2.76956	0.273965	0.273965	-0.670788	83.1434	true		0.390989		true	1	40				N	N	N	N
148	G4	false	2T	GAPDH	UNKNOWN	SYBR	None				3.77162	3.52755	4.03258	18.945	18.9058	0.037474		-4.01395	0.034763	0.034763	-1.91518	83.1434	true		0.390989		true	1	40				N	N	N	N
149	G5	false	2T	GAPDH	UNKNOWN	SYBR	None				3.77162	3.52755	4.03258	18.9022	18.9058	0.037474		-4.01395	0.034763	0.034763	-1.91518	83.1434	true		0.390989		true	1	40				N	N	N	N
150	G6	false	2T	GAPDH	UNKNOWN	SYBR	None				3.77162	3.52755	4.03258	18.8703	18.9058	0.037474		-4.01395	0.034763	0.034763	-1.91518	83.1434	true		0.390989		true	1	40				N	N	N	N
52	C4	false	3N	GAPDH	UNKNOWN	SYBR	None				8.37657	7.23912	9.69273	18.9099	18.8629	0.053736		-5.16513	0.0758323	0.0758323	-3.06636	83.1434	true		0.390989		true	1	40				N	N	N	N
53	C5	false	3N	GAPDH	UNKNOWN	SYBR	None				8.37657	7.23912	9.69273	18.8043	18.8629	0.053736		-5.16513	0.0758323	0.0758323	-3.06636	83.1434	true		0.390989		true	1	40				N	N	N	N
54	C6	false	3N	GAPDH	UNKNOWN	SYBR	None				8.37657	7.23912	9.69273	18.8746	18.8629	0.053736		-5.16513	0.0758323	0.0758323	-3.06636	83.1434	true		0.390989		true	1	40				N	N	N	N
172	H4	false	3T	GAPDH	UNKNOWN	SYBR	None				7.07274	6.53655	7.65292	18.1597	18.1236	0.0456245		-4.92104	0.0409662	0.0409662	-2.82227	83.1434	true		0.390989		true	1	40				N	N	N	N
173	H5	false	3T	GAPDH	UNKNOWN	SYBR	None				7.07274	6.53655	7.65292	18.1387	18.1236	0.0456245		-4.92104	0.0409662	0.0409662	-2.82227	83.1434	true		0.390989		true	1	40				N	N	N	N
174	H6	false	3T	GAPDH	UNKNOWN	SYBR	None				7.07274	6.53655	7.65292	18.0723	18.1236	0.0456245		-4.92104	0.0409662	0.0409662	-2.82227	83.1434	true		0.390989		true	1	40				N	N	N	N
76	D4	false	4N	GAPDH	UNKNOWN	SYBR	None				1.44547	1.25468	1.66527	20.6774	20.6273	0.0612779		-2.6303	0.0735549	0.0735549	-0.531535	83.1434	true		0.390989		true	1	40				N	N	N	N
77	D5	false	4N	GAPDH	UNKNOWN	SYBR	None				1.44547	1.25468	1.66527	20.559	20.6273	0.0612779		-2.6303	0.0735549	0.0735549	-0.531535	83.1434	true		0.390989		true	1	40				N	N	N	N
78	D6	false	4N	GAPDH	UNKNOWN	SYBR	None				1.44547	1.25468	1.66527	20.6456	20.6273	0.0612779		-2.6303	0.0735549	0.0735549	-0.531535	83.1434	true		0.390989		true	1	40				N	N	N	N
196	I4	false	4T	GAPDH	UNKNOWN	SYBR	None				1.84377	1.22497	2.77518	23.1901	23.3706	0.206961		-2.98143	0.212473	0.212473	-0.882662	83.1434	true		0.390989		true	1	40				N	N	N	N
197	I5	false	4T	GAPDH	UNKNOWN	SYBR	None				1.84377	1.22497	2.77518	23.5965	23.3706	0.206961		-2.98143	0.212473	0.212473	-0.882662	83.1434	true		0.390989		true	1	40				N	N	N	N
198	I6	false	4T	GAPDH	UNKNOWN	SYBR	None				1.84377	1.22497	2.77518	23.3252	23.3706	0.206961		-2.98143	0.212473	0.212473	-0.882662	83.1434	true		0.390989		true	1	40				N	N	N	N
100	E4	false	5N	GAPDH	UNKNOWN	SYBR	None				5.98285	5.51464	6.49082	19.3691	19.353	0.01726		-4.6796	0.0423444	0.0423444	-2.58083	83.1434	true		0.390989		true	1	40				N	N	N	N
101	E5	false	5N	GAPDH	UNKNOWN	SYBR	None				5.98285	5.51464	6.49082	19.3552	19.353	0.01726		-4.6796	0.0423444	0.0423444	-2.58083	83.1434	true		0.390989		true	1	40				N	N	N	N
102	E6	false	5N	GAPDH	UNKNOWN	SYBR	None				5.98285	5.51464	6.49082	19.3348	19.353	0.01726		-4.6796	0.0423444	0.0423444	-2.58083	83.1434	true		0.390989		true	1	40				N	N	N	N
220	J4	false	5T	GAPDH	UNKNOWN	SYBR	None				6.69408	5.57278	8.041	19.404	19.3196	0.160773		-4.84166	0.0952618	0.0952618	-2.74289	83.1434	true		0.390989		true	1	40				N	N	N	N
221	J5	false	5T	GAPDH	UNKNOWN	SYBR	None				6.69408	5.57278	8.041	19.1342	19.3196	0.160773		-4.84166	0.0952618	0.0952618	-2.74289	83.1434	true		0.390989		true	1	40				N	N	N	N
222	J6	false	5T	GAPDH	UNKNOWN	SYBR	None				6.69408	5.57278	8.041	19.4207	19.3196	0.160773		-4.84166	0.0952618	0.0952618	-2.74289	83.0082	true		0.390989		true	1	40				N	N	N	N
1	A1	false	1N	POLR2J2	UNKNOWN	SYBR	None							26.9647	27.0506	0.109392						81.6567	true		0.431192		true	1	40				N	N	N	N
2	A2	false	1N	POLR2J2	UNKNOWN	SYBR	None							27.1737	27.0506	0.109392						81.6567	true		0.431192		true	1	40				N	N	N	N
3	A3	false	1N	POLR2J2	UNKNOWN	SYBR	None							27.0133	27.0506	0.109392						81.6567	true		0.431192		true	1	40				N	N	N	N
121	F1	false	1T	POLR2J2	UNKNOWN	SYBR	None							23.5982	23.6286	0.0858408						81.7919	true		0.431192		true	1	40				N	N	N	N
122	F2	false	1T	POLR2J2	UNKNOWN	SYBR	None							23.7255	23.6286	0.0858408						81.7919	true		0.431192		true	1	40				N	N	N	N
123	F3	false	1T	POLR2J2	UNKNOWN	SYBR	None							23.5621	23.6286	0.0858408						81.7919	true		0.431192		true	1	40				N	N	N	N
25	B1	false	2N	POLR2J2	UNKNOWN	SYBR	None							28.6287	28.9086	0.351749						81.6567	true		0.431192		true	1	40				N	N	N	N
26	B2	false	2N	POLR2J2	UNKNOWN	SYBR	None							29.3035	28.9086	0.351749						81.7919	true		0.431192		true	1	40				N	N	N	N
27	B3	false	2N	POLR2J2	UNKNOWN	SYBR	None							28.7936	28.9086	0.351749						81.7919	true		0.431192		true	1	40				N	N	N	N
145	G1	false	2T	POLR2J2	UNKNOWN	SYBR	None							22.946	22.9198	0.0471285						81.7919	true		0.431192		true	1	40				N	N	N	N
146	G2	false	2T	POLR2J2	UNKNOWN	SYBR	None							22.948	22.9198	0.0471285						81.7919	true		0.431192		true	1	40				N	N	N	N
147	G3	false	2T	POLR2J2	UNKNOWN	SYBR	None							22.8654	22.9198	0.0471285						81.7919	true		0.431192		true	1	40				N	N	N	N
49	C1	false	3N	POLR2J2	UNKNOWN	SYBR	None							24.1342	24.028	0.11985						81.7919	true		0.431192		true	1	40				N	N	N	N
50	C2	false	3N	POLR2J2	UNKNOWN	SYBR	None							23.8981	24.028	0.11985						81.7919	true		0.431192		true	1	40				N	N	N	N
51	C3	false	3N	POLR2J2	UNKNOWN	SYBR	None							24.0518	24.028	0.11985						81.7919	true		0.431192		true	1	40				N	N	N	N
169	H1	false	3T	POLR2J2	UNKNOWN	SYBR	None							23.0919	23.0446	0.0543424						81.7919	true		0.431192		true	1	40				N	N	N	N
170	H2	false	3T	POLR2J2	UNKNOWN	SYBR	None							23.0566	23.0446	0.0543424						81.927	true		0.431192		true	1	40				N	N	N	N
171	H3	false	3T	POLR2J2	UNKNOWN	SYBR	None							22.9852	23.0446	0.0543424						81.927	true		0.431192		true	1	40				N	N	N	N
73	D1	false	4N	POLR2J2	UNKNOWN	SYBR	None							23.3628	23.2576	0.111696						81.7919	true		0.431192		true	1	40				N	N	N	N
74	D2	false	4N	POLR2J2	UNKNOWN	SYBR	None							23.2697	23.2576	0.111696						81.7919	true		0.431192		true	1	40				N	N	N	N
75	D3	false	4N	POLR2J2	UNKNOWN	SYBR	None							23.1404	23.2576	0.111696						81.927	true		0.431192		true	1	40				N	N	N	N
193	I1	false	4T	POLR2J2	UNKNOWN	SYBR	None							26.7025	26.352	0.304305						81.927	true		0.431192		true	1	40				N	N	N	N
194	I2	false	4T	POLR2J2	UNKNOWN	SYBR	None							26.198	26.352	0.304305						81.7919	true		0.431192		true	1	40				N	N	N	N
195	I3	false	4T	POLR2J2	UNKNOWN	SYBR	None							26.1556	26.352	0.304305						81.7919	true		0.431192		true	1	40				N	N	N	N
97	E1	false	5N	POLR2J2	UNKNOWN	SYBR	None							24.1147	24.0326	0.0712828						81.7919	true		0.431192		true	1	40				N	N	N	N
98	E2	false	5N	POLR2J2	UNKNOWN	SYBR	None							23.9973	24.0326	0.0712828						81.7919	true		0.431192		true	1	40				N	N	N	N
99	E3	false	5N	POLR2J2	UNKNOWN	SYBR	None							23.9858	24.0326	0.0712828						81.7919	true		0.431192		true	1	40				N	N	N	N
217	J1	false	5T	POLR2J2	UNKNOWN	SYBR	None							24.2021	24.1613	0.0371012						81.7919	true		0.431192		true	1	40				N	N	N	N
218	J2	false	5T	POLR2J2	UNKNOWN	SYBR	None							24.1295	24.1613	0.0371012						81.7919	true		0.431192		true	1	40				N	N	N	N
219	J3	false	5T	POLR2J2	UNKNOWN	SYBR	None							24.1523	24.1613	0.0371012						81.7919	true		0.431192		true	1	40				N	N	N	N
Analysis Type	Singleplex
Endogenous Control	POLR2J2
RQ Min/Max Confidence Level	95.0
Reference Sample	1N

## Sheet: Melt Curve Raw Data
Block Type	384-Well Block
Calibration Background is expired	No
Calibration Background performed on	07-08-2021
Calibration Normalization FAM-ROX is expired	Yes
Calibration Normalization FAM-ROX performed on	11-06-2019
Calibration Normalization VIC-ROX is expired	Yes
Calibration Normalization VIC-ROX performed on	11-06-2019
Calibration Pure Dye ABY is expired	No
Calibration Pure Dye ABY performed on	07-08-2021
Calibration Pure Dye CY5 is expired	No
Calibration Pure Dye CY5 performed on	07-08-2021
Calibration Pure Dye FAM is expired	No
Calibration Pure Dye FAM performed on	07-08-2021
Calibration Pure Dye JUN is expired	No
Calibration Pure Dye JUN performed on	07-08-2021
Calibration Pure Dye MUSTANG PURPLE is expired	No
Calibration Pure Dye MUSTANG PURPLE performed on	07-08-2021
Calibration Pure Dye NED is expired	No
Calibration Pure Dye NED performed on	07-08-2021
Calibration Pure Dye ROX is expired	No
Calibration Pure Dye ROX performed on	07-08-2021
Calibration Pure Dye SYBR is expired	No
Calibration Pure Dye SYBR performed on	07-08-2021
Calibration Pure Dye TAMRA is expired	No
Calibration Pure Dye TAMRA performed on	07-08-2021
Calibration Pure Dye VIC is expired	No
Calibration Pure Dye VIC performed on	07-08-2021
Calibration ROI is expired	No
Calibration ROI performed on	07-08-2021
Calibration Uniformity is expired	No
Calibration Uniformity performed on	07-08-2021
Chemistry	SYBR_GREEN
Date Created	2021-07-17 06:55:48 AM GMT+08:00
Experiment Barcode
Experiment Comment
Experiment File Name	C:\Users\Administrator\Desktop\2021-07-17 065544.eds
Experiment Name	2021-07-17 065544
Experiment Run End Time	2021-07-18 04:47:10 AM GMT+08:00
Experiment Type	Comparative Cт (ΔΔCт)
Instrument Name	278860858
Instrument Serial Number	278860858
Instrument Type	QuantStudio(TM) 6 Flex System
Passive Reference	ROX
Quantification Cycle Method	Ct
Signal Smoothing On	true
Stage/ Cycle where Analysis is performed	Stage 2, Step 2
User Name
Well	Well Position	Reading	Temperature	Fluorescence	Derivative
1	A1	1	60.1672	4.0625	0.204126
1	A1	2	60.4375	4.05329	0.201711
1	A1	3	60.7078	4.04299	0.200028
1	A1	4	60.9781	4.02373	0.199608
1	A1	5	61.2484	3.99404	0.200655
1	A1	6	61.5187	3.96798	0.203028
1	A1	7	61.789	3.96005	0.206355
1	A1	8	62.0594	3.91893	0.210179
1	A1	9	62.3297	3.89096	0.214017
1	A1	10	62.6	3.8872	0.217378
1	A1	11	62.8703	3.849	0.219808
1	A1	12	63.1406	3.81792	0.220996
1	A1	13	63.4109	3.79229	0.220893
1	A1	14	63.6812	3.764	0.219729
1	A1	15	63.9515	3.74937	0.217951
1	A1	16	64.2218	3.70959	0.216081
1	A1	17	64.4921	3.68962	0.214613
1	A1	18	64.7624	3.66351	0.213907
1	A1	19	65.0327	3.64166	0.214125
1	A1	20	65.3031	3.61642	0.215197
1	A1	21	65.5734	3.59399	0.216846
1	A1	22	65.8437	3.56122	0.218701
1	A1	23	66.114	3.53503	0.220432
1	A1	24	66.3843	3.51711	0.221848
1	A1	25	66.6546	3.48644	0.222944
1	A1	26	66.9249	3.45213	0.223859
1	A1	27	67.1952	3.43039	0.224795
1	A1	28	67.4655	3.40955	0.225892
1	A1	29	67.7358	3.38371	0.227148
1	A1	30	68.0061	3.3441	0.228413
1	A1	31	68.2764	3.33065	0.229461
1	A1	32	68.5468	3.29331	0.230078
1	A1	33	68.8171	3.27286	0.230143
1	A1	34	69.0874	3.24449	0.229687
1	A1	35	69.3577	3.21308	0.228902
1	A1	36	69.628	3.17858	0.228048
1	A1	37	69.8983	3.16264	0.22733
1	A1	38	70.1686	3.14218	0.226781
1	A1	39	70.4389	3.0986	0.226294
1	A1	40	70.7092	3.07507	0.22573
1	A1	41	70.9795	3.04991	0.225007
1	A1	42	71.2498	3.02574	0.224071
1	A1	43	71.5201	3.00035	0.222824
1	A1	44	71.7905	2.9726	0.221144
1	A1	45	72.0608	2.9425	0.219025
1	A1	46	72.3311	2.91292	0.216713
1	A1	47	72.6014	2.89232	0.214667
1	A1	48	72.8717	2.86742	0.213352
1	A1	49	73.142	2.84778	0.212973
1	A1	50	73.4123	2.8178	0.213375
1	A1	51	73.6826	2.79478	0.214162
1	A1	52	73.9529	2.76763	0.214949
1	A1	53	74.2232	2.73709	0.215561
1	A1	54	74.4935	2.71376	0.216061
1	A1	55	74.7638	2.69245	0.216614
1	A1	56	75.0341	2.66371	0.217324
1	A1	57	75.3045	2.63449	0.218127
1	A1	58	75.5748	2.60708	0.218821
1	A1	59	75.8451	2.58995	0.219179
1	A1	60	76.1154	2.55635	0.21911
1	A1	61	76.3857	2.5225	0.218786
1	A1	62	76.656	2.50571	0.218661
1	A1	63	76.9263	2.47896	0.219385
1	A1	64	77.1966	2.45562	0.221659
1	A1	65	77.4669	2.427	0.226165
1	A1	66	77.7372	2.40265	0.23366
1	A1	67	78.0075	2.37737	0.245222
1	A1	68	78.2778	2.34496	0.262533
1	A1	69	78.5482	2.3168	0.288086
1	A1	70	78.8185	2.28923	0.325201
1	A1	71	79.0888	2.25675	0.377836
1	A1	72	79.3591	2.21769	0.450166
1	A1	73	79.6294	2.16702	0.546001
1	A1	74	79.8997	2.12579	0.667973
1	A1	75	80.17	2.0427	0.816442
1	A1	76	80.4403	1.95248	0.98797
1	A1	77	80.7106	1.83563	1.17339
1	A1	78	80.9809	1.67847	1.35612
1	A1	79	81.2512	1.51321	1.51203
1	A1	80	81.5215	1.30897	1.61269
1	A1	81	81.7919	1.01288	1.63242
1	A1	82	82.0622	0.666515	1.55723
1	A1	83	82.3325	0.39802	1.39178
1	A1	84	82.6028	0.235168	1.15999
1	A1	85	82.8731	0.167721	0.898442
1	A1	86	83.1434	0.159274	0.645167
1	A1	87	83.4137	0.156635	0.429161
1	A1	88	83.684	0.155371	0.264776
1	A1	89	83.9543	0.154683	0.152288
1	A1	90	84.2246	0.154262	0.0826885
1	A1	91	84.4949	0.148694	0.0435426
1	A1	92	84.7652	0.150333	0.0234007
1	A1	93	85.0356	0.147785	0.0138704
1	A1	94	85.3059	0.149551	0.00976164
1	A1	95	85.5762	0.14862	0.00825964
1	A1	96	85.8465	0.14561	0.00794553
1	A1	97	86.1168	0.149102	0.00808438
1	A1	98	86.3871	0.143346	0.0082554
1	A1	99	86.6574	0.143496	0.00822143
1	A1	100	86.9277	0.140758	0.00790361
1	A1	101	87.198	0.141751	0.00736683
1	A1	102	87.4683	0.140543	0.00677505
1	A1	103	87.7386	0.139335	0.00631552
1	A1	104	88.0089	0.139276	0.00611297
1	A1	105	88.2793	0.141113	0.00616683
1	A1	106	88.5496	0.138088	0.00634381
1	A1	107	88.8199	0.137045	0.00643769
1	A1	108	89.0902	0.134446	0.00626766
1	A1	109	89.3605	0.136185	0.00575711
1	A1	110	89.6308	0.132905	0.00494656
1	A1	111	89.9011	0.136263	0.00394624
1	A1	112	90.1714	0.133667	0.00288112
1	A1	113	90.4417	0.133421	0.0018763
1	A1	114	90.712	0.132844	0.00107822
1	A1	115	90.9823	0.133248	0.000663411
1	A1	116	91.2526	0.136954	0.00079169
1	A1	117	91.5229	0.133465	0.00151646
1	A1	118	91.7933	0.136206	0.00271306
1	A1	119	92.0636	0.133805	0.00408536
1	A1	120	92.3339	0.132222	0.00526233
1	A1	121	92.6042	0.131185	0.00593755
1	A1	122	92.8745	0.129472	0.00598072
1	A1	123	93.1448	0.127951	0.00546678
1	A1	124	93.4151	0.131722	0.00461642
1	A1	125	93.6854	0.126636	0.00368577
1	A1	126	93.9557	0.128451	0.00286328
1	A1	127	94.226	0.131789	0.00222014
1	A1	128	94.4963	0.126142	0.00172745
1	A1	129	94.7666	0.128091	0.001317
2	A2	1	60.1672	4.16934	0.210512
2	A2	2	60.4375	4.14919	0.208044
2	A2	3	60.7078	4.12231	0.204995
2	A2	4	60.9781	4.10879	0.202191
2	A2	5	61.2484	4.08405	0.200576
2	A2	6	61.5187	4.06863	0.20082
2	A2	7	61.789	4.04172	0.203054
2	A2	8	62.0594	4.01689	0.206845
2	A2	9	62.3297	4.00178	0.211415
2	A2	10	62.6	3.97136	0.215943
2	A2	11	62.8703	3.94141	0.219814
2	A2	12	63.1406	3.91732	0.222731
2	A2	13	63.4109	3.89314	0.224663
2	A2	14	63.6812	3.86772	0.225776
2	A2	15	63.9515	3.84114	0.226345
2	A2	16	64.2218	3.80391	0.226711
2	A2	17	64.4921	3.7883	0.227185
2	A2	18	64.7624	3.75738	0.22792
2	A2	19	65.0327	3.73925	0.228835
2	A2	20	65.3031	3.70832	0.22967
2	A2	21	65.5734	3.67294	0.230152
2	A2	22	65.8437	3.65232	0.230168
2	A2	23	66.114	3.62783	0.229821
2	A2	24	66.3843	3.59344	0.229371
2	A2	25	66.6546	3.57808	0.229116
2	A2	26	66.9249	3.53709	0.229297
2	A2	27	67.1952	3.52409	0.230057
2	A2	28	67.4655	3.49113	0.231458
2	A2	29	67.7358	3.46684	0.233495
2	A2	30	68.0061	3.43739	0.236111
2	A2	31	68.2764	3.41517	0.239169
2	A2	32	68.5468	3.37764	0.242404
2	A2	33	68.8171	3.36107	0.245408
2	A2	34	69.0874	3.33295	0.247701
2	A2	35	69.3577	3.29106	0.248901
2	A2	36	69.628	3.26292	0.248875
2	A2	37	69.8983	3.23596	0.247772
2	A2	38	70.1686	3.2062	0.245919
2	A2	39	70.4389	3.17689	0.243679
2	A2	40	70.7092	3.14863	0.241362
2	A2	41	70.9795	3.12174	0.239201
2	A2	42	71.2498	3.08706	0.237332
2	A2	43	71.5201	3.06915	0.235724
2	A2	44	71.7905	3.04117	0.234141
2	A2	45	72.0608	3.01358	0.232207
2	A2	46	72.3311	2.9784	0.229625
2	A2	47	72.6014	2.95742	0.226389
2	A2	48	72.8717	2.92528	0.222885
2	A2	49	73.142	2.90102	0.219733
2	A2	50	73.4123	2.88303	0.217504
2	A2	51	73.6826	2.85686	0.216463
2	A2	52	73.9529	2.82776	0.216499
2	A2	53	74.2232	2.80937	0.217265
2	A2	54	74.4935	2.77841	0.21838
2	A2	55	74.7638	2.74644	0.219589
2	A2	56	75.0341	2.73094	0.220793
2	A2	57	75.3045	2.70352	0.221998
2	A2	58	75.5748	2.66836	0.223257
2	A2	59	75.8451	2.64692	0.224626
2	A2	60	76.1154	2.62103	0.226142
2	A2	61	76.3857	2.59559	0.227791
2	A2	62	76.656	2.56827	0.229557
2	A2	63	76.9263	2.54212	0.231547
2	A2	64	77.1966	2.50848	0.234179
2	A2	65	77.4669	2.48429	0.238328
2	A2	66	77.7372	2.46122	0.245356
2	A2	67	78.0075	2.42994	0.257041
2	A2	68	78.2778	2.40936	0.27553
2	A2	69	78.5482	2.37245	0.303376
2	A2	70	78.8185	2.34638	0.343623
2	A2	71	79.0888	2.30643	0.399819
2	A2	72	79.3591	2.26934	0.475809
2	A2	73	79.6294	2.2225	0.575235
2	A2	74	79.8997	2.16195	0.700702
2	A2	75	80.17	2.08912	0.852549
2	A2	76	80.4403	1.99211	1.02717
2	A2	77	80.7106	1.87622	1.21503
2	A2	78	80.9809	1.71624	1.39898
2	A2	79	81.2512	1.54244	1.55443
2	A2	80	81.5215	1.32905	1.65276
2	A2	81	81.7919	1.04418	1.66844
2	A2	82	82.0622	0.697367	1.58799
2	A2	83	82.3325	0.430676	1.41663
2	A2	84	82.6028	0.260805	1.17891
2	A2	85	82.8731	0.201934	0.911885
2	A2	86	83.1434	0.191565	0.653961
2	A2	87	83.4137	0.187879	0.434289
2	A2	88	83.684	0.18918	0.267227
2	A2	89	83.9543	0.186591	0.152957
2	A2	90	84.2246	0.182022	0.0823439
2	A2	91	84.4949	0.184982	0.0428094
2	A2	92	84.7652	0.184139	0.0227187
2	A2	93	85.0356	0.183487	0.0134409
2	A2	94	85.3059	0.179729	0.00954356
2	A2	95	85.5762	0.181301	0.00804998
2	A2	96	85.8465	0.17811	0.00751917
2	A2	97	86.1168	0.183146	0.00732531
2	A2	98	86.3871	0.17561	0.00722417
2	A2	99	86.6574	0.176678	0.00714243
2	A2	100	86.9277	0.176314	0.00708112
2	A2	101	87.198	0.175427	0.00705213
2	A2	102	87.4683	0.174966	0.00702532
2	A2	103	87.7386	0.174056	0.00691233
2	A2	104	88.0089	0.172635	0.00661103
2	A2	105	88.2793	0.171539	0.00609025
2	A2	106	88.5496	0.167975	0.00544395
2	A2	107	88.8199	0.172053	0.00485766
2	A2	108	89.0902	0.172672	0.00449642
2	A2	109	89.3605	0.171232	0.00439843
2	A2	110	89.6308	0.167845	0.00446043
2	A2	111	89.9011	0.16939	0.00452378
2	A2	112	90.1714	0.167525	0.00448389
2	A2	113	90.4417	0.167164	0.00433555
2	A2	114	90.712	0.169119	0.00413435
2	A2	115	90.9823	0.167493	0.00392691
2	A2	116	91.2526	0.164596	0.00371598
2	A2	117	91.5229	0.167063	0.00347813
2	A2	118	91.7933	0.164926	0.00320468
2	A2	119	92.0636	0.166516	0.00292896
2	A2	120	92.3339	0.164605	0.00272556
2	A2	121	92.6042	0.163574	0.00268179
2	A2	122	92.8745	0.16581	0.00285024
2	A2	123	93.1448	0.165214	0.00320014
2	A2	124	93.4151	0.165845	0.00360038
2	A2	125	93.6854	0.160982	0.00386255
2	A2	126	93.9557	0.162343	0.0038294
2	A2	127	94.226	0.161967	0.00345407
2	A2	128	94.4963	0.161676	0.0028162
2	A2	129	94.7666	0.161529	0.00207127
3	A3	1	60.1672	4.21785	0.223207
3	A3	2	60.4375	4.18798	0.222489
3	A3	3	60.7078	4.17384	0.222727
3	A3	4	60.9781	4.17065	0.22418
3	A3	5	61.2484	4.12076	0.226735
3	A3	6	61.5187	4.11245	0.229909
3	A3	7	61.789	4.07009	0.233006
3	A3	8	62.0594	4.04775	0.235341
3	A3	9	62.3297	4.03088	0.236459
3	A3	10	62.6	3.99474	0.236277
3	A3	11	62.8703	3.95743	0.235135
3	A3	12	63.1406	3.93583	0.233672
3	A3	13	63.4109	3.91756	0.232563
3	A3	14	63.6812	3.88944	0.232249
3	A3	15	63.9515	3.86573	0.232856
3	A3	16	64.2218	3.8305	0.23426
3	A3	17	64.4921	3.80329	0.236177
3	A3	18	64.7624	3.775	0.238187
3	A3	19	65.0327	3.76818	0.239765
3	A3	20	65.3031	3.72602	0.240446
3	A3	21	65.5734	3.69006	0.240114
3	A3	22	65.8437	3.64911	0.239117
3	A3	23	66.114	3.64808	0.238096
3	A3	24	66.3843	3.62081	0.237595
3	A3	25	66.6546	3.58796	0.237804
3	A3	26	66.9249	3.5537	0.238577
3	A3	27	67.1952	3.52928	0.239631
3	A3	28	67.4655	3.50161	0.240715
3	A3	29	67.7358	3.48718	0.241672
3	A3	30	68.0061	3.44671	0.242453
3	A3	31	68.2764	3.41072	0.243146
3	A3	32	68.5468	3.39653	0.243957
3	A3	33	68.8171	3.36297	0.245102
3	A3	34	69.0874	3.33933	0.24665
3	A3	35	69.3577	3.30957	0.248448
3	A3	36	69.628	3.27817	0.250202
3	A3	37	69.8983	3.24769	0.251615
3	A3	38	70.1686	3.21675	0.25248
3	A3	39	70.4389	3.18756	0.25267
3	A3	40	70.7092	3.1623	0.252093
3	A3	41	70.9795	3.13104	0.2507
3	A3	42	71.2498	3.09832	0.248558
3	A3	43	71.5201	3.06675	0.245913
3	A3	44	71.7905	3.0431	0.243146
3	A3	45	72.0608	3.01814	0.240622
3	A3	46	72.3311	2.98839	0.238558
3	A3	47	72.6014	2.96137	0.236994
3	A3	48	72.8717	2.93102	0.235824
3	A3	49	73.142	2.90354	0.234859
3	A3	50	73.4123	2.88608	0.233869
3	A3	51	73.6826	2.85379	0.232659
3	A3	52	73.9529	2.82088	0.231147
3	A3	53	74.2232	2.79288	0.229439
3	A3	54	74.4935	2.77654	0.227787
3	A3	55	74.7638	2.74438	0.226461
3	A3	56	75.0341	2.71729	0.22565
3	A3	57	75.3045	2.69579	0.225444
3	A3	58	75.5748	2.66085	0.225907
3	A3	59	75.8451	2.64366	0.227133
3	A3	60	76.1154	2.60933	0.229216
3	A3	61	76.3857	2.58863	0.232164
3	A3	62	76.656	2.56679	0.235857
3	A3	63	76.9263	2.53201	0.240148
3	A3	64	77.1966	2.50573	0.245093
3	A3	65	77.4669	2.46726	0.251189
3	A3	66	77.7372	2.45432	0.259509
3	A3	67	78.0075	2.4197	0.271716
3	A3	68	78.2778	2.38662	0.290028
3	A3	69	78.5482	2.35802	0.317217
3	A3	70	78.8185	2.33138	0.356608
3	A3	71	79.0888	2.28559	0.41199
3	A3	72	79.3591	2.24764	0.487333
3	A3	73	79.6294	2.20774	0.586278
3	A3	74	79.8997	2.14227	0.71138
3	A3	75	80.17	2.06162	0.862991
3	A3	76	80.4403	1.97376	1.03766
3	A3	77	80.7106	1.85356	1.22609
3	A3	78	80.9809	1.69974	1.41141
3	A3	79	81.2512	1.51845	1.56906
3	A3	80	81.5215	1.31517	1.67014
3	A3	81	81.7919	1.02946	1.68853
3	A3	82	82.0622	0.682009	1.61006
3	A3	83	82.3325	0.407888	1.43944
3	A3	84	82.6028	0.239463	1.20102
3	A3	85	82.8731	0.178728	0.932094
3	A3	86	83.1434	0.168141	0.671494
3	A3	87	83.4137	0.163793	0.448847
3	A3	88	83.684	0.159205	0.278862
3	A3	89	83.9543	0.157688	0.161925
3	A3	90	84.2246	0.155459	0.0890082
3	A3	91	84.4949	0.155842	0.047592
3	A3	92	84.7652	0.153656	0.0260868
3	A3	93	85.0356	0.15225	0.015883
3	A3	94	85.3059	0.152693	0.0115102
3	A3	95	85.5762	0.152865	0.00987086
3	A3	96	85.8465	0.150157	0.00933722
3	A3	97	86.1168	0.149775	0.00909464
3	A3	98	86.3871	0.145933	0.00877655
3	A3	99	86.6574	0.146553	0.00828446
3	A3	100	86.9277	0.146009	0.00768041
3	A3	101	87.198	0.144101	0.00709632
3	A3	102	87.4683	0.143954	0.00665574
3	A3	103	87.7386	0.14413	0.00642107
3	A3	104	88.0089	0.143751	0.00637781
3	A3	105	88.2793	0.14215	0.00645648
3	A3	106	88.5496	0.140259	0.00657772
3	A3	107	88.8199	0.140188	0.00669042
3	A3	108	89.0902	0.141158	0.0067779
3	A3	109	89.3605	0.138657	0.00683282
3	A3	110	89.6308	0.137626	0.00682683
3	A3	111	89.9011	0.138221	0.00670337
3	A3	112	90.1714	0.135806	0.00640283
3	A3	113	90.4417	0.135072	0.00590645
3	A3	114	90.712	0.136014	0.00527534
3	A3	115	90.9823	0.132753	0.00465901
3	A3	116	91.2526	0.134292	0.0042525
3	A3	117	91.5229	0.134645	0.00420655
3	A3	118	91.7933	0.13508	0.00453136
3	A3	119	92.0636	0.134911	0.00506348
3	A3	120	92.3339	0.131221	0.00553699
3	A3	121	92.6042	0.129271	0.00572783
3	A3	122	92.8745	0.130149	0.00557479
3	A3	123	93.1448	0.130803	0.00519037
3	A3	124	93.4151	0.129592	0.00475674
3	A3	125	93.6854	0.128916	0.00438759
3	A3	126	93.9557	0.130674	0.00405651
3	A3	127	94.226	0.127612	0.00363746
3	A3	128	94.4963	0.126182	0.00301727
3	A3	129	94.7666	0.126091	0.00219492
4	A4	1	60.1672	4.30149	0.188798
4	A4	2	60.4375	4.2761	0.189485
4	A4	3	60.7078	4.24293	0.189273
4	A4	4	60.9781	4.21513	0.188201
4	A4	5	61.2484	4.19965	0.186795
4	A4	6	61.5187	4.17425	0.185776
4	A4	7	61.789	4.14725	0.185674
4	A4	8	62.0594	4.12371	0.186568
4	A4	9	62.3297	4.11007	0.1881
4	A4	10	62.6	4.06418	0.189728
4	A4	11	62.8703	4.0556	0.19101
4	A4	12	63.1406	4.01533	0.191772
4	A4	13	63.4109	3.98768	0.192096
4	A4	14	63.6812	3.98092	0.192171
4	A4	15	63.9515	3.93711	0.192177
4	A4	16	64.2218	3.91511	0.192215
4	A4	17	64.4921	3.88497	0.192311
4	A4	18	64.7624	3.867	0.192405
4	A4	19	65.0327	3.83637	0.192384
4	A4	20	65.3031	3.81314	0.192139
4	A4	21	65.5734	3.77797	0.191659
4	A4	22	65.8437	3.75478	0.191059
4	A4	23	66.114	3.73322	0.190534
4	A4	24	66.3843	3.70523	0.190248
4	A4	25	66.6546	3.67971	0.190271
4	A4	26	66.9249	3.65797	0.190609
4	A4	27	67.1952	3.62069	0.191274
4	A4	28	67.4655	3.60235	0.192294
4	A4	29	67.7358	3.57401	0.193639
4	A4	30	68.0061	3.55717	0.195143
4	A4	31	68.2764	3.51871	0.196522
4	A4	32	68.5468	3.49763	0.197497
4	A4	33	68.8171	3.46832	0.197942
4	A4	34	69.0874	3.43151	0.19793
4	A4	35	69.3577	3.41968	0.197673
4	A4	36	69.628	3.38724	0.197409
4	A4	37	69.8983	3.35381	0.197313
4	A4	38	70.1686	3.32901	0.197476
4	A4	39	70.4389	3.30868	0.197908
4	A4	40	70.7092	3.27199	0.198523
4	A4	41	70.9795	3.25025	0.199129
4	A4	42	71.2498	3.2224	0.19945
4	A4	43	71.5201	3.19654	0.19921
4	A4	44	71.7905	3.16373	0.198251
4	A4	45	72.0608	3.13547	0.196619
4	A4	46	72.3311	3.11041	0.194566
4	A4	47	72.6014	3.08464	0.192437
4	A4	48	72.8717	3.05748	0.190535
4	A4	49	73.142	3.03334	0.189022
4	A4	50	73.4123	3.01152	0.187935
4	A4	51	73.6826	2.9789	0.187271
4	A4	52	73.9529	2.951	0.187043
4	A4	53	74.2232	2.93439	0.187279
4	A4	54	74.4935	2.90732	0.187969
4	A4	55	74.7638	2.87778	0.18902
4	A4	56	75.0341	2.85209	0.190284
4	A4	57	75.3045	2.82423	0.191619
4	A4	58	75.5748	2.79765	0.192911
4	A4	59	75.8451	2.77289	0.194052
4	A4	60	76.1154	2.7449	0.194902
4	A4	61	76.3857	2.71585	0.19528
4	A4	62	76.656	2.69075	0.195042
4	A4	63	76.9263	2.6642	0.194167
4	A4	64	77.1966	2.63119	0.192816
4	A4	65	77.4669	2.60504	0.191287
4	A4	66	77.7372	2.59017	0.18988
4	A4	67	78.0075	2.5561	0.188781
4	A4	68	78.2778	2.53393	0.188009
4	A4	69	78.5482	2.50709	0.187497
4	A4	70	78.8185	2.47523	0.187197
4	A4	71	79.0888	2.45908	0.187199
4	A4	72	79.3591	2.43204	0.18784
4	A4	73	79.6294	2.40602	0.189907
4	A4	74	79.8997	2.37506	0.194988
4	A4	75	80.17	2.35255	0.205987
4	A4	76	80.4403	2.33507	0.227744
4	A4	77	80.7106	2.30581	0.267578
4	A4	78	80.9809	2.27555	0.335334
4	A4	79	81.2512	2.25329	0.442226
4	A4	80	81.5215	2.21388	0.597672
4	A4	81	81.7919	2.16553	0.803995
4	A4	82	82.0622	2.10468	1.05033
4	A4	83	82.3325	1.98675	1.30885
4	A4	84	82.6028	1.80645	1.53691
4	A4	85	82.8731	1.45708	1.68694
4	A4	86	83.1434	0.9668	1.72161
4	A4	87	83.4137	0.547237	1.62786
4	A4	88	83.684	0.250287	1.42273
4	A4	89	83.9543	0.135209	1.14758
4	A4	90	84.2246	0.110644	0.853508
4	A4	91	84.4949	0.101502	0.585223
4	A4	92	84.7652	0.101849	0.370279
4	A4	93	85.0356	0.100936	0.216878
4	A4	94	85.3059	0.0990944	0.118572
4	A4	95	85.5762	0.0967186	0.0617289
4	A4	96	85.8465	0.0975977	0.0319843
4	A4	97	86.1168	0.0954229	0.0178796
4	A4	98	86.3871	0.0944564	0.0118409
4	A4	99	86.6574	0.0915064	0.00956703
4	A4	100	86.9277	0.0923211	0.00890121
4	A4	101	87.198	0.0920302	0.00883483
4	A4	102	87.4683	0.0891711	0.00887716
4	A4	103	87.7386	0.0865104	0.00876972
4	A4	104	88.0089	0.0860744	0.00841249
4	A4	105	88.2793	0.0835776	0.00785497
4	A4	106	88.5496	0.085554	0.00725716
4	A4	107	88.8199	0.0841301	0.00680356
4	A4	108	89.0902	0.0826406	0.00660968
4	A4	109	89.3605	0.0829173	0.00666659
4	A4	110	89.6308	0.0812923	0.0068433
4	A4	111	89.9011	0.0800063	0.00693988
4	A4	112	90.1714	0.0803574	0.00677366
4	A4	113	90.4417	0.0761453	0.0062703
4	A4	114	90.712	0.0744363	0.0055149
4	A4	115	90.9823	0.076798	0.00472236
4	A4	116	91.2526	0.0787949	0.00412953
4	A4	117	91.5229	0.076953	0.00387094
4	A4	118	91.7933	0.0746454	0.00391941
4	A4	119	92.0636	0.0749893	0.00412446
4	A4	120	92.3339	0.0748113	0.00430992
4	A4	121	92.6042	0.0724867	0.00435924
4	A4	122	92.8745	0.0732741	0.00424498
4	A4	123	93.1448	0.0721914	0.00400422
4	A4	124	93.4151	0.07169	0.00369145
4	A4	125	93.6854	0.0709225	0.0033379
4	A4	126	93.9557	0.0731173	0.00293749
4	A4	127	94.226	0.0691028	0.00246438
4	A4	128	94.4963	0.0699448	0.00190943
4	A4	129	94.7666	0.0696132	0.00130845
5	A5	1	60.1672	4.46275	0.195998
5	A5	2	60.4375	4.43392	0.199244
5	A5	3	60.7078	4.41911	0.20214
5	A5	4	60.9781	4.37943	0.20393
5	A5	5	61.2484	4.34538	0.204403
5	A5	6	61.5187	4.3167	0.203882
5	A5	7	61.789	4.30947	0.202868
5	A5	8	62.0594	4.27095	0.201667
5	A5	9	62.3297	4.25175	0.20028
5	A5	10	62.6	4.21089	0.198605
5	A5	11	62.8703	4.18541	0.19668
5	A5	12	63.1406	4.16372	0.194771
5	A5	13	63.4109	4.14837	0.193224
5	A5	14	63.6812	4.10522	0.192315
5	A5	15	63.9515	4.09583	0.192182
5	A5	16	64.2218	4.0579	0.192898
5	A5	17	64.4921	4.03135	0.194531
5	A5	18	64.7624	4.01815	0.19711
5	A5	19	65.0327	3.97989	0.200529
5	A5	20	65.3031	3.96228	0.204435
5	A5	21	65.5734	3.92448	0.208208
5	A5	22	65.8437	3.90916	0.211084
5	A5	23	66.114	3.86982	0.212387
5	A5	24	66.3843	3.84155	0.211809
5	A5	25	66.6546	3.8014	0.209577
5	A5	26	66.9249	3.78682	0.206394
5	A5	27	67.1952	3.74902	0.203175
5	A5	28	67.4655	3.72335	0.20069
5	A5	29	67.7358	3.71727	0.199338
5	A5	30	68.0061	3.67518	0.199116
5	A5	31	68.2764	3.64212	0.199747
5	A5	32	68.5468	3.62027	0.200816
5	A5	33	68.8171	3.60769	0.20187
5	A5	34	69.0874	3.57028	0.202548
5	A5	35	69.3577	3.53636	0.202748
5	A5	36	69.628	3.50879	0.202713
5	A5	37	69.8983	3.47358	0.202919
5	A5	38	70.1686	3.46994	0.203731
5	A5	39	70.4389	3.4297	0.205078
5	A5	40	70.7092	3.39606	0.2064
5	A5	41	70.9795	3.38526	0.206933
5	A5	42	71.2498	3.34121	0.206184
5	A5	43	71.5201	3.30048	0.204235
5	A5	44	71.7905	3.29037	0.201692
5	A5	45	72.0608	3.25993	0.199318
5	A5	46	72.3311	3.23832	0.197605
5	A5	47	72.6014	3.20685	0.196577
5	A5	48	72.8717	3.18407	0.19591
5	A5	49	73.142	3.15727	0.195235
5	A5	50	73.4123	3.11831	0.194414
5	A5	51	73.6826	3.10295	0.19361
5	A5	52	73.9529	3.07921	0.193175
5	A5	53	74.2232	3.04942	0.193449
5	A5	54	74.4935	3.02372	0.194614
5	A5	55	74.7638	2.99568	0.196609
5	A5	56	75.0341	2.97203	0.199111
5	A5	57	75.3045	2.94843	0.201608
5	A5	58	75.5748	2.914	0.20355
5	A5	59	75.8451	2.88017	0.204538
5	A5	60	76.1154	2.8534	0.204449
5	A5	61	76.3857	2.83094	0.203433
5	A5	62	76.656	2.80065	0.201774
5	A5	63	76.9263	2.7735	0.199763
5	A5	64	77.1966	2.74404	0.197646
5	A5	65	77.4669	2.72152	0.195626
5	A5	66	77.7372	2.69257	0.193893
5	A5	67	78.0075	2.66456	0.192584
5	A5	68	78.2778	2.6473	0.191729
5	A5	69	78.5482	2.61673	0.191253
5	A5	70	78.8185	2.59065	0.19106
5	A5	71	79.0888	2.56489	0.191206
5	A5	72	79.3591	2.53637	0.192083
5	A5	73	79.6294	2.51442	0.1946
5	A5	74	79.8997	2.49106	0.200436
5	A5	75	80.17	2.4643	0.21248
5	A5	76	80.4403	2.43904	0.235509
5	A5	77	80.7106	2.41091	0.27689
5	A5	78	80.9809	2.38398	0.346738
5	A5	79	81.2512	2.35548	0.456734
5	A5	80	81.5215	2.32119	0.61678
5	A5	81	81.7919	2.2736	0.829492
5	A5	82	82.0622	2.20243	1.08392
5	A5	83	82.3325	2.08938	1.35165
5	A5	84	82.6028	1.89948	1.58894
5	A5	85	82.8731	1.55412	1.74667
5	A5	86	83.1434	1.05652	1.78587
5	A5	87	83.4137	0.620903	1.69227
5	A5	88	83.684	0.313356	1.48266
5	A5	89	83.9543	0.185966	1.19925
5	A5	90	84.2246	0.164451	0.894851
5	A5	91	84.4949	0.156912	0.616079
5	A5	92	84.7652	0.15209	0.391997
5	A5	93	85.0356	0.151134	0.231568
5	A5	94	85.3059	0.148922	0.128401
5	A5	95	85.5762	0.148062	0.068481
5	A5	96	85.8465	0.146362	0.0369065
5	A5	97	86.1168	0.143324	0.0217187
5	A5	98	86.3871	0.14266	0.0149458
5	A5	99	86.6574	0.141333	0.0119972
5	A5	100	86.9277	0.138518	0.0105423
5	A5	101	87.198	0.137384	0.00953947
5	A5	102	87.4683	0.137135	0.00861905
5	A5	103	87.7386	0.133983	0.00774774
5	A5	104	88.0089	0.134936	0.00703711
5	A5	105	88.2793	0.134501	0.00660251
5	A5	106	88.5496	0.135893	0.00646155
5	A5	107	88.8199	0.1332	0.00650622
5	A5	108	89.0902	0.130809	0.00656216
5	A5	109	89.3605	0.128342	0.00648913
5	A5	110	89.6308	0.130609	0.0062461
5	A5	111	89.9011	0.129815	0.0058793
5	A5	112	90.1714	0.129178	0.00546112
5	A5	113	90.4417	0.125533	0.0050406
5	A5	114	90.712	0.127864	0.00463612
5	A5	115	90.9823	0.125983	0.00425096
5	A5	116	91.2526	0.126263	0.00387917
5	A5	117	91.5229	0.12644	0.00350039
5	A5	118	91.7933	0.124331	0.0030871
5	A5	119	92.0636	0.124883	0.00263613
5	A5	120	92.3339	0.122742	0.00220309
5	A5	121	92.6042	0.124879	0.00189958
5	A5	122	92.8745	0.125197	0.00183818
5	A5	123	93.1448	0.124044	0.00205373
5	A5	124	93.4151	0.125491	0.00245644
5	A5	125	93.6854	0.123364	0.00285593
5	A5	126	93.9557	0.121528	0.00304772
5	A5	127	94.226	0.121243	0.00291003
5	A5	128	94.4963	0.122022	0.00245411
5	A5	129	94.7666	0.120423	0.00180447
6	A6	1	60.1672	4.3955	0.195691
6	A6	2	60.4375	4.3895	0.19764
6	A6	3	60.7078	4.34593	0.199391
6	A6	4	60.9781	4.32018	0.200501
6	A6	5	61.2484	4.29992	0.200802
6	A6	6	61.5187	4.26922	0.200381
6	A6	7	61.789	4.246	0.199446
6	A6	8	62.0594	4.20714	0.198195
6	A6	9	62.3297	4.19124	0.196792
6	A6	10	62.6	4.16657	0.19544
6	A6	11	62.8703	4.12811	0.194457
6	A6	12	63.1406	4.11362	0.194242
6	A6	13	63.4109	4.07341	0.195095
6	A6	14	63.6812	4.06428	0.196976
6	A6	15	63.9515	4.03674	0.199403
6	A6	16	64.2218	4.00999	0.201651
6	A6	17	64.4921	3.97099	0.203125
6	A6	18	64.7624	3.93029	0.20366
6	A6	19	65.0327	3.92138	0.203522
6	A6	20	65.3031	3.89461	0.203134
6	A6	21	65.5734	3.86075	0.202806
6	A6	22	65.8437	3.83761	0.202633
6	A6	23	66.114	3.79755	0.202587
6	A6	24	66.3843	3.77994	0.202603
6	A6	25	66.6546	3.75434	0.202603
6	A6	26	66.9249	3.72367	0.202486
6	A6	27	67.1952	3.69279	0.202162
6	A6	28	67.4655	3.67066	0.201655
6	A6	29	67.7358	3.62978	0.201128
6	A6	30	68.0061	3.61434	0.200815
6	A6	31	68.2764	3.58708	0.200876
6	A6	32	68.5468	3.56324	0.201303
6	A6	33	68.8171	3.52567	0.201936
6	A6	34	69.0874	3.50464	0.202539
6	A6	35	69.3577	3.46813	0.202856
6	A6	36	69.628	3.45481	0.202658
6	A6	37	69.8983	3.41491	0.201806
6	A6	38	70.1686	3.38767	0.20035
6	A6	39	70.4389	3.35353	0.198564
6	A6	40	70.7092	3.32911	0.196842
6	A6	41	70.9795	3.30972	0.195462
6	A6	42	71.2498	3.2882	0.194448
6	A6	43	71.5201	3.25416	0.193641
6	A6	44	71.7905	3.21823	0.192925
6	A6	45	72.0608	3.19939	0.192403
6	A6	46	72.3311	3.17301	0.192349
6	A6	47	72.6014	3.14992	0.192966
6	A6	48	72.8717	3.12685	0.194196
6	A6	49	73.142	3.0946	0.195706
6	A6	50	73.4123	3.06893	0.197054
6	A6	51	73.6826	3.03135	0.197879
6	A6	52	73.9529	3.02256	0.198003
6	A6	53	74.2232	2.9813	0.19742
6	A6	54	74.4935	2.95539	0.196263
6	A6	55	74.7638	2.92809	0.194755
6	A6	56	75.0341	2.89926	0.193158
6	A6	57	75.3045	2.87876	0.191702
6	A6	58	75.5748	2.8476	0.190546
6	A6	59	75.8451	2.82418	0.18977
6	A6	60	76.1154	2.79212	0.18941
6	A6	61	76.3857	2.76918	0.189461
6	A6	62	76.656	2.7514	0.189844
6	A6	63	76.9263	2.71481	0.190393
6	A6	64	77.1966	2.69611	0.190873
6	A6	65	77.4669	2.66143	0.191085
6	A6	66	77.7372	2.63703	0.190954
6	A6	67	78.0075	2.61701	0.190557
6	A6	68	78.2778	2.58114	0.190087
6	A6	69	78.5482	2.56317	0.189808
6	A6	70	78.8185	2.53499	0.189994
6	A6	71	79.0888	2.50743	0.190933
6	A6	72	79.3591	2.48233	0.192946
6	A6	73	79.6294	2.46248	0.196557
6	A6	74	79.8997	2.43212	0.202864
6	A6	75	80.17	2.40169	0.214196
6	A6	76	80.4403	2.37694	0.234969
6	A6	77	80.7106	2.34921	0.272467
6	A6	78	80.9809	2.31953	0.336972
6	A6	79	81.2512	2.29234	0.44055
6	A6	80	81.5215	2.26293	0.593718
6	A6	81	81.7919	2.21745	0.799988
6	A6	82	82.0622	2.14271	1.04956
6	A6	83	82.3325	2.04059	1.31517
6	A6	84	82.6028	1.86344	1.55384
6	A6	85	82.8731	1.51834	1.71644
6	A6	86	83.1434	1.02392	1.76306
6	A6	87	83.4137	0.572454	1.67791
6	A6	88	83.684	0.262263	1.47614
6	A6	89	83.9543	0.128697	1.19878
6	A6	90	84.2246	0.10425	0.898223
6	A6	91	84.4949	0.0962521	0.621281
6	A6	92	84.7652	0.092305	0.397597
6	A6	93	85.0356	0.0879066	0.236768
6	A6	94	85.3059	0.0870817	0.132873
6	A6	95	85.5762	0.0857975	0.0721371
6	A6	96	85.8465	0.0825667	0.039723
6	A6	97	86.1168	0.0816431	0.0236658
6	A6	98	86.3871	0.076673	0.0160257
6	A6	99	86.6574	0.0760459	0.0123325
6	A6	100	86.9277	0.0776509	0.0104298
6	A6	101	87.198	0.074038	0.00940916
6	A6	102	87.4683	0.0734466	0.00888966
6	A6	103	87.7386	0.0735449	0.00864565
6	A6	104	88.0089	0.0708036	0.00847864
6	A6	105	88.2793	0.0705144	0.0082237
6	A6	106	88.5496	0.0686772	0.00780158
6	A6	107	88.8199	0.0646165	0.00725165
6	A6	108	89.0902	0.0689845	0.00670498
6	A6	109	89.3605	0.0662633	0.006301
6	A6	110	89.6308	0.0667585	0.00609705
6	A6	111	89.9011	0.0658075	0.00603537
6	A6	112	90.1714	0.0621394	0.0059921
6	A6	113	90.4417	0.0624131	0.00586953
6	A6	114	90.712	0.0622535	0.0056599
6	A6	115	90.9823	0.0616647	0.00543643
6	A6	116	91.2526	0.061228	0.00528681
6	A6	117	91.5229	0.0602971	0.00524484
6	A6	118	91.7933	0.0607826	0.00526826
6	A6	119	92.0636	0.0574009	0.00527099
6	A6	120	92.3339	0.0579346	0.00517971
6	A6	121	92.6042	0.056794	0.00497364
6	A6	122	92.8745	0.0571089	0.00468532
6	A6	123	93.1448	0.0555039	0.00436716
6	A6	124	93.4151	0.0557446	0.00404955
6	A6	125	93.6854	0.0549398	0.00371711
6	A6	126	93.9557	0.0555704	0.00331839
6	A6	127	94.226	0.0528554	0.00280387
6	A6	128	94.4963	0.0530196	0.00216944
6	A6	129	94.7666	0.0531883	0.00147527
7	A7	1	60.1672	0.193572	0.072216
7	A7	2	60.4375	0.187414	0.0743604
7	A7	3	60.7078	0.186359	0.0759592
7	A7	4	60.9781	0.182439	0.0765458
7	A7	5	61.2484	0.177652	0.0760786
7	A7	6	61.5187	0.176914	0.0749134
7	A7	7	61.789	0.174919	0.0735571
7	A7	8	62.0594	0.17105	0.0723806
7	A7	9	62.3297	0.169769	0.0714686
7	A7	10	62.6	0.168039	0.0706737
7	A7	11	62.8703	0.163274	0.0697845
7	A7	12	63.1406	0.160088	0.0686808
7	A7	13	63.4109	0.160981	0.0673854
7	A7	14	63.6812	0.155906	0.0660276
7	A7	15	63.9515	0.155183	0.0647689
7	A7	16	64.2218	0.150485	0.0637353
7	A7	17	64.4921	0.150789	0.0629691
7	A7	18	64.7624	0.147458	0.0624094
7	A7	19	65.0327	0.147264	0.0619138
7	A7	20	65.3031	0.141007	0.0613093
7	A7	21	65.5734	0.141146	0.0604445
7	A7	22	65.8437	0.139359	0.0592245
7	A7	23	66.114	0.136972	0.0576376
7	A7	24	66.3843	0.133934	0.055783
7	A7	25	66.6546	0.131732	0.0538764
7	A7	26	66.9249	0.129747	0.0521963
7	A7	27	67.1952	0.130361	0.0509758
7	A7	28	67.4655	0.126913	0.0503025
7	A7	29	67.7358	0.124647	0.0500928
7	A7	30	68.0061	0.124767	0.0501553
7	A7	31	68.2764	0.121314	0.0503029
7	A7	32	68.5468	0.120778	0.0504463
7	A7	33	68.8171	0.116671	0.0506133
7	A7	34	69.0874	0.116938	0.0508816
7	A7	35	69.3577	0.114879	0.0512641
7	A7	36	69.628	0.112546	0.0516281
7	A7	37	69.8983	0.111185	0.0517265
7	A7	38	70.1686	0.109168	0.0513486
7	A7	39	70.4389	0.107114	0.0504931
7	A7	40	70.7092	0.102448	0.0494127
7	A7	41	70.9795	0.102426	0.0484546
7	A7	42	71.2498	0.103183	0.0477963
7	A7	43	71.5201	0.102119	0.0472891
7	A7	44	71.7905	0.0967456	0.0465653
7	A7	45	72.0608	0.0964679	0.0453431
7	A7	46	72.3311	0.093717	0.0436822
7	A7	47	72.6014	0.0921395	0.0419782
7	A7	48	72.8717	0.0914777	0.0406938
7	A7	49	73.142	0.0925286	0.0400373
7	A7	50	73.4123	0.0890371	0.0398316
7	A7	51	73.6826	0.0875133	0.0396582
7	A7	52	73.9529	0.0863413	0.0391598
7	A7	53	74.2232	0.0838215	0.0382724
7	A7	54	74.4935	0.0817701	0.0372367
7	A7	55	74.7638	0.083015	0.036404
7	A7	56	75.0341	0.0809479	0.0359957
7	A7	57	75.3045	0.0796396	0.0359931
7	A7	58	75.5748	0.0784521	0.0362176
7	A7	59	75.8451	0.0769937	0.0365119
7	A7	60	76.1154	0.0732284	0.0368596
7	A7	61	76.3857	0.0748786	0.0373557
7	A7	62	76.656	0.0739247	0.0380687
7	A7	63	76.9263	0.0717964	0.0389324
7	A7	64	77.1966	0.0698458	0.0397494
7	A7	65	77.4669	0.0671739	0.0402868
7	A7	66	77.7372	0.067574	0.0403715
7	A7	67	78.0075	0.0661965	0.0399365
7	A7	68	78.2778	0.0635877	0.0390354
7	A7	69	78.5482	0.0613371	0.0378448
7	A7	70	78.8185	0.0616132	0.0366343
7	A7	71	79.0888	0.0594728	0.0356688
7	A7	72	79.3591	0.0583989	0.035072
7	A7	73	79.6294	0.0601966	0.034751
7	A7	74	79.8997	0.0553715	0.0344664
7	A7	75	80.17	0.0538654	0.0340209
7	A7	76	80.4403	0.0548037	0.033435
7	A7	77	80.7106	0.0510029	0.0329725
7	A7	78	80.9809	0.0520571	0.0329903
7	A7	79	81.2512	0.0511361	0.0337168
7	A7	80	81.5215	0.0499551	0.0351103
7	A7	81	81.7919	0.0485188	0.0368749
7	A7	82	82.0622	0.0461346	0.0385992
7	A7	83	82.3325	0.0449269	0.0399105
7	A7	84	82.6028	0.0441627	0.0405649
7	A7	85	82.8731	0.0420793	0.0404679
7	A7	86	83.1434	0.0400273	0.0396619
7	A7	87	83.4137	0.0387984	0.0383086
7	A7	88	83.684	0.0377894	0.0366537
7	A7	89	83.9543	0.0348299	0.0349606
7	A7	90	84.2246	0.0374656	0.0334276
7	A7	91	84.4949	0.0327136	0.032134
7	A7	92	84.7652	0.033439	0.0310469
7	A7	93	85.0356	0.0316188	0.0300798
7	A7	94	85.3059	0.0305894	0.0291694
7	A7	95	85.5762	0.0309307	0.0283251
7	A7	96	85.8465	0.0266592	0.0276249
7	A7	97	86.1168	0.0287828	0.027158
7	A7	98	86.3871	0.0265158	0.0269536
7	A7	99	86.6574	0.027013	0.0269527
7	A7	100	86.9277	0.022003	0.0270488
7	A7	101	87.198	0.0238997	0.0271526
7	A7	102	87.4683	0.0232849	0.0272116
7	A7	103	87.7386	0.0215901	0.0271727
7	A7	104	88.0089	0.0206319	0.0269556
7	A7	105	88.2793	0.0199851	0.0264909
7	A7	106	88.5496	0.0157998	0.0257855
7	A7	107	88.8199	0.0197039	0.0249242
7	A7	108	89.0902	0.0174146	0.0239763
7	A7	109	89.3605	0.0154412	0.0228974
7	A7	110	89.6308	0.0150436	0.0215449
7	A7	111	89.9011	0.0147019	0.0198279
7	A7	112	90.1714	0.0130662	0.0178735
7	A7	113	90.4417	0.0113875	0.0160671
7	A7	114	90.712	0.0157522	0.014912
7	A7	115	90.9823	0.0120201	0.0147955
7	A7	116	91.2526	0.012026	0.0157986
7	A7	117	91.5229	0.0120938	0.0176452
7	A7	118	91.7933	0.0112723	0.0197874
7	A7	119	92.0636	0.00985227	0.0215777
7	A7	120	92.3339	0.00920238	0.0224726
7	A7	121	92.6042	0.00638219	0.0222115
7	A7	122	92.8745	0.00701591	0.0208949
7	A7	123	93.1448	0.00547995	0.0189013
7	A7	124	93.4151	0.00715608	0.0166677
7	A7	125	93.6854	0.00552205	0.0144651
7	A7	126	93.9557	0.00483201	0.0123159
7	A7	127	94.226	0.00413892	0.0100995
7	A7	128	94.4963	0.00405334	0.00774436
7	A7	129	94.7666	0.0036137	0.00535253
8	A8	1	60.1672	0.154933	0.0698498
8	A8	2	60.4375	0.148069	0.0710591
8	A8	3	60.7078	0.147183	0.0721314
8	A8	4	60.9781	0.145187	0.0728786
8	A8	5	61.2484	0.142791	0.0732819
8	A8	6	61.5187	0.139117	0.0734636
8	A8	7	61.789	0.135983	0.0735697
8	A8	8	62.0594	0.136017	0.0736298
8	A8	9	62.3297	0.131781	0.0734755
8	A8	10	62.6	0.129188	0.0727959
8	A8	11	62.8703	0.127881	0.0713254
8	A8	12	63.1406	0.123157	0.0690692
8	A8	13	63.4109	0.120369	0.0664071
8	A8	14	63.6812	0.118028	0.0639734
8	A8	15	63.9515	0.118208	0.0623549
8	A8	16	64.2218	0.11484	0.0617863
8	A8	17	64.4921	0.11473	0.0620411
8	A8	18	64.7624	0.110691	0.0625856
8	A8	19	65.0327	0.109131	0.0628879
8	A8	20	65.3031	0.104741	0.0626751
8	A8	21	65.5734	0.104466	0.0619853
8	A8	22	65.8437	0.100408	0.0610183
8	A8	23	66.114	0.100775	0.0599277
8	A8	24	66.3843	0.0985623	0.0587207
8	A8	25	66.6546	0.0940638	0.0573229
8	A8	26	66.9249	0.0938169	0.0557325
8	A8	27	67.1952	0.0904717	0.0541209
8	A8	28	67.4655	0.0897511	0.0527945
8	A8	29	67.7358	0.0872423	0.052036
8	A8	30	68.0061	0.0865822	0.051931
8	A8	31	68.2764	0.0853104	0.052283
8	A8	32	68.5468	0.0814742	0.0526707
8	A8	33	68.8171	0.0818961	0.0526316
8	A8	34	69.0874	0.0783954	0.0518873
8	A8	35	69.3577	0.0759987	0.0504954
8	A8	36	69.628	0.0733663	0.0488276
8	A8	37	69.8983	0.072985	0.0473629
8	A8	38	70.1686	0.0719341	0.0464084
8	A8	39	70.4389	0.0708978	0.0459307
8	A8	40	70.7092	0.0685697	0.0456221
8	A8	41	70.9795	0.0664641	0.0451561
8	A8	42	71.2498	0.064512	0.0444399
8	A8	43	71.5201	0.0621262	0.0436689
8	A8	44	71.7905	0.0616737	0.0431386
8	A8	45	72.0608	0.0609311	0.0429826
8	A8	46	72.3311	0.0618512	0.0430582
8	A8	47	72.6014	0.0562331	0.0430767
8	A8	48	72.8717	0.0544174	0.0428528
8	A8	49	73.142	0.0536621	0.0424392
8	A8	50	73.4123	0.0523834	0.0420423
8	A8	51	73.6826	0.0541106	0.0418226
8	A8	52	73.9529	0.0480641	0.0417738
8	A8	53	74.2232	0.0494401	0.0417682
8	A8	54	74.4935	0.045732	0.0416829
8	A8	55	74.7638	0.0449213	0.041474
8	A8	56	75.0341	0.0450948	0.0411533
8	A8	57	75.3045	0.042189	0.0407372
8	A8	58	75.5748	0.0401803	0.0402391
8	A8	59	75.8451	0.0395443	0.0397029
8	A8	60	76.1154	0.0373558	0.0392089
8	A8	61	76.3857	0.0371948	0.0388206
8	A8	62	76.656	0.0352899	0.0385095
8	A8	63	76.9263	0.0339053	0.0381423
8	A8	64	77.1966	0.0337086	0.0375678
8	A8	65	77.4669	0.0295419	0.0367583
8	A8	66	77.7372	0.0294933	0.0358907
8	A8	67	78.0075	0.0286425	0.0352891
8	A8	68	78.2778	0.027677	0.0352424
8	A8	69	78.5482	0.0269468	0.0358114
8	A8	70	78.8185	0.0256086	0.0367587
8	A8	71	79.0888	0.0238735	0.0376559
8	A8	72	79.3591	0.0226395	0.038109
8	A8	73	79.6294	0.0197862	0.0379683
8	A8	74	79.8997	0.0188012	0.0373965
8	A8	75	80.17	0.0190164	0.0367507
8	A8	76	80.4403	0.0160271	0.0363483
8	A8	77	80.7106	0.0163391	0.0362562
8	A8	78	80.9809	0.0162324	0.0362414
8	A8	79	81.2512	0.0123918	0.0359199
8	A8	80	81.5215	0.012054	0.0350153
8	A8	81	81.7919	0.00880152	0.0335503
8	A8	82	82.0622	0.00864105	0.0318458
8	A8	83	82.3325	0.00926489	0.0303392
8	A8	84	82.6028	0.00841888	0.0293621
8	A8	85	82.8731	0.00490682	0.0290249
8	A8	86	83.1434	0.00678597	0.0292449
8	A8	87	83.4137	0.00372327	0.0298437
8	A8	88	83.684	0.00314268	0.0306203
8	A8	89	83.9543	0.0032786	0.0313803
8	A8	90	84.2246	0.000814682	0.0319579
8	A8	91	84.4949	0.000155803	0.0322634
8	A8	92	84.7652	-0.00309549	0.0323263
8	A8	93	85.0356	-0.00131023	0.0322767
8	A8	94	85.3059	-0.00394622	0.0322469
8	A8	95	85.5762	-0.00501621	0.0322532
8	A8	96	85.8465	-0.00438031	0.0321549
8	A8	97	86.1168	-0.00771827	0.0317364
8	A8	98	86.3871	-0.00876447	0.0308679
8	A8	99	86.6574	-0.010758	0.0296277
8	A8	100	86.9277	-0.0103856	0.0282919
8	A8	101	87.198	-0.0123677	0.0271957
8	A8	102	87.4683	-0.0116004	0.026565
8	A8	103	87.7386	-0.0134532	0.0264377
8	A8	104	88.0089	-0.0140935	0.0267053
8	A8	105	88.2793	-0.0173347	0.0271984
8	A8	106	88.5496	-0.0151651	0.0277108
8	A8	107	88.8199	-0.0168975	0.027952
8	A8	108	89.0902	-0.0177813	0.0275429
8	A8	109	89.3605	-0.0197076	0.0261629
8	A8	110	89.6308	-0.0238304	0.0237938
8	A8	111	89.9011	-0.0208812	0.0208504
8	A8	112	90.1714	-0.0213295	0.0180348
8	A8	113	90.4417	-0.020686	0.0159846
8	A8	114	90.712	-0.0224785	0.0149758
8	A8	115	90.9823	-0.0236913	0.0148815
8	A8	116	91.2526	-0.0240706	0.0153547
8	A8	117	91.5229	-0.0225566	0.016039
8	A8	118	91.7933	-0.0259499	0.0166611
8	A8	119	92.0636	-0.0241011	0.0170261
8	A8	120	92.3339	-0.0267263	0.0170174
8	A8	121	92.6042	-0.0270667	0.0166366
8	A8	122	92.8745	-0.0283535	0.0160162
8	A8	123	93.1448	-0.0266477	0.0153314
8	A8	124	93.4151	-0.0275594	0.0146469
8	A8	125	93.6854	-0.0286751	0.0138258
8	A8	126	93.9557	-0.0303522	0.0126018
8	A8	127	94.226	-0.0293063	0.010778
8	A8	128	94.4963	-0.0312882	0.00840274
8	A8	129	94.7666	-0.0301183	0.00579019
9	A9	1	60.1672	0.232379	0.0891899
9	A9	2	60.4375	0.228994	0.0904002
9	A9	3	60.7078	0.22626	0.0915818
9	A9	4	60.9781	0.225494	0.0924377
9	A9	5	61.2484	0.223565	0.0928139
9	A9	6	61.5187	0.217673	0.0927597
9	A9	7	61.789	0.216272	0.0924712
9	A9	8	62.0594	0.215905	0.092144
9	A9	9	62.3297	0.213461	0.0918454
9	A9	10	62.6	0.208927	0.0914826
9	A9	11	62.8703	0.206455	0.0908804
9	A9	12	63.1406	0.206239	0.0898902
9	A9	13	63.4109	0.202057	0.0884565
9	A9	14	63.6812	0.200447	0.0866106
9	A9	15	63.9515	0.19655	0.0844163
9	A9	16	64.2218	0.195414	0.0819121
9	A9	17	64.4921	0.194687	0.0791026
9	A9	18	64.7624	0.190634	0.0760308
9	A9	19	65.0327	0.188255	0.0728806
9	A9	20	65.3031	0.186911	0.0700043
9	A9	21	65.5734	0.185032	0.0678222
9	A9	22	65.8437	0.183776	0.0666312
9	A9	23	66.114	0.183736	0.0664586
9	A9	24	66.3843	0.179693	0.0670496
9	A9	25	66.6546	0.177885	0.0679678
9	A9	26	66.9249	0.178131	0.0687329
9	A9	27	67.1952	0.174054	0.0689462
9	A9	28	67.4655	0.173341	0.0684005
9	A9	29	67.7358	0.171703	0.0671775
9	A9	30	68.0061	0.16706	0.0656563
9	A9	31	68.2764	0.1669	0.0643706
9	A9	32	68.5468	0.167216	0.0637452
9	A9	33	68.8171	0.16398	0.0638475
9	A9	34	69.0874	0.162953	0.0643268
9	A9	35	69.3577	0.162189	0.0645888
9	A9	36	69.628	0.157047	0.0641033
9	A9	37	69.8983	0.157764	0.0626726
9	A9	38	70.1686	0.155256	0.0605204
9	A9	39	70.4389	0.151168	0.0581835
9	A9	40	70.7092	0.154496	0.0562667
9	A9	41	70.9795	0.149242	0.0551956
9	A9	42	71.2498	0.150515	0.0550665
9	A9	43	71.5201	0.147936	0.0556506
9	A9	44	71.7905	0.147224	0.0565301
9	A9	45	72.0608	0.144119	0.0572797
9	A9	46	72.3311	0.14389	0.0576114
9	A9	47	72.6014	0.140899	0.0574213
9	A9	48	72.8717	0.140953	0.0567445
9	A9	49	73.142	0.137726	0.0556658
9	A9	50	73.4123	0.136544	0.0542454
9	A9	51	73.6826	0.137419	0.0525072
9	A9	52	73.9529	0.132994	0.0504924
9	A9	53	74.2232	0.132324	0.0483351
9	A9	54	74.4935	0.131149	0.0463
9	A9	55	74.7638	0.131819	0.0447397
9	A9	56	75.0341	0.127721	0.0439818
9	A9	57	75.3045	0.128438	0.0441825
9	A9	58	75.5748	0.126848	0.0452207
9	A9	59	75.8451	0.128067	0.0467046
9	A9	60	76.1154	0.123859	0.0481155
9	A9	61	76.3857	0.122151	0.0490178
9	A9	62	76.656	0.121261	0.0491917
9	A9	63	76.9263	0.120453	0.048608
9	A9	64	77.1966	0.119243	0.0473101
9	A9	65	77.4669	0.119006	0.0453527
9	A9	66	77.7372	0.114136	0.0428661
9	A9	67	78.0075	0.114938	0.0401607
9	A9	68	78.2778	0.11443	0.0377283
9	A9	69	78.5482	0.113237	0.0360906
9	A9	70	78.8185	0.113363	0.0355935
9	A9	71	79.0888	0.111675	0.0362759
9	A9	72	79.3591	0.110655	0.0378717
9	A9	73	79.6294	0.110883	0.0399061
9	A9	74	79.8997	0.107829	0.04182
9	A9	75	80.17	0.108391	0.0431011
9	A9	76	80.4403	0.105897	0.0434191
9	A9	77	80.7106	0.105153	0.0427396
9	A9	78	80.9809	0.101951	0.0413602
9	A9	79	81.2512	0.103059	0.0398103
9	A9	80	81.5215	0.102383	0.0386349
9	A9	81	81.7919	0.0995038	0.0381557
9	A9	82	82.0622	0.10132	0.0383337
9	A9	83	82.3325	0.0989353	0.03881
9	A9	84	82.6028	0.0974725	0.0391002
9	A9	85	82.8731	0.0967892	0.038838
9	A9	86	83.1434	0.0943247	0.0379326
9	A9	87	83.4137	0.0941685	0.0365707
9	A9	88	83.684	0.0941508	0.0350904
9	A9	89	83.9543	0.0925328	0.0338314
9	A9	90	84.2246	0.0911494	0.0330437
9	A9	91	84.4949	0.0910978	0.0328616
9	A9	92	84.7652	0.0901276	0.0332976
9	A9	93	85.0356	0.089184	0.0342284
9	A9	94	85.3059	0.0892446	0.0353965
9	A9	95	85.5762	0.0864584	0.036463
9	A9	96	85.8465	0.0870818	0.0371128
9	A9	97	86.1168	0.0841981	0.0371591
9	A9	98	86.3871	0.0838811	0.0365917
9	A9	99	86.6574	0.082687	0.0355522
9	A9	100	86.9277	0.0817056	0.0342586
9	A9	101	87.198	0.0798708	0.032913
9	A9	102	87.4683	0.0803421	0.0316231
9	A9	103	87.7386	0.0801802	0.0303745
9	A9	104	88.0089	0.0784166	0.0290849
9	A9	105	88.2793	0.0759311	0.027719
9	A9	106	88.5496	0.0769231	0.0263687
9	A9	107	88.8199	0.0771862	0.0252053
9	A9	108	89.0902	0.076617	0.0243213
9	A9	109	89.3605	0.0734654	0.0235952
9	A9	110	89.6308	0.0763079	0.0227149
9	A9	111	89.9011	0.072205	0.0213704
9	A9	112	90.1714	0.0738878	0.0194831
9	A9	113	90.4417	0.0712821	0.0173081
9	A9	114	90.712	0.0725819	0.0153266
9	A9	115	90.9823	0.0737965	0.0140018
9	A9	116	91.2526	0.0721326	0.0135678
9	A9	117	91.5229	0.0706781	0.0139812
9	A9	118	91.7933	0.0713867	0.0150234
9	A9	119	92.0636	0.0711945	0.0164281
9	A9	120	92.3339	0.0706136	0.0179323
9	A9	121	92.6042	0.0701556	0.0192609
9	A9	122	92.8745	0.0680148	0.0201231
9	A9	123	93.1448	0.0690659	0.0202499
9	A9	124	93.4151	0.0675713	0.0194558
9	A9	125	93.6854	0.0679513	0.0176865
9	A9	126	93.9557	0.0655207	0.015049
9	A9	127	94.226	0.0669157	0.0118229
9	A9	128	94.4963	0.065917	0.00842435
9	A9	129	94.7666	0.0665743	0.00530698
10	A10	1	60.1672	0.536537	0.191065
10	A10	2	60.4375	0.523566	0.198197
10	A10	3	60.7078	0.511767	0.205218
10	A10	4	60.9781	0.500875	0.210431
10	A10	5	61.2484	0.488114	0.212803
10	A10	6	61.5187	0.478412	0.212223
10	A10	7	61.789	0.467654	0.209285
10	A10	8	62.0594	0.457068	0.204832
10	A10	9	62.3297	0.448078	0.199559
10	A10	10	62.6	0.43848	0.193855
10	A10	11	62.8703	0.428745	0.187879
10	A10	12	63.1406	0.420833	0.181749
10	A10	13	63.4109	0.407513	0.175673
10	A10	14	63.6812	0.403576	0.169937
10	A10	15	63.9515	0.394367	0.164776
10	A10	16	64.2218	0.386335	0.16022
10	A10	17	64.4921	0.378026	0.156054
10	A10	18	64.7624	0.373217	0.151917
10	A10	19	65.0327	0.362717	0.14749
10	A10	20	65.3031	0.354146	0.142646
10	A10	21	65.5734	0.348137	0.137469
10	A10	22	65.8437	0.34392	0.132157
10	A10	23	66.114	0.335931	0.126911
10	A10	24	66.3843	0.330116	0.121878
10	A10	25	66.6546	0.322459	0.117168
10	A10	26	66.9249	0.318637	0.112866
10	A10	27	67.1952	0.3135	0.109015
10	A10	28	67.4655	0.308305	0.105601
10	A10	29	67.7358	0.303138	0.102571
10	A10	30	68.0061	0.296954	0.0998866
10	A10	31	68.2764	0.292875	0.0975389
10	A10	32	68.5468	0.288524	0.0955183
10	A10	33	68.8171	0.284521	0.0937486
10	A10	34	69.0874	0.279822	0.092061
10	A10	35	69.3577	0.274214	0.0902351
10	A10	36	69.628	0.270434	0.0880786
10	A10	37	69.8983	0.264551	0.0854896
10	A10	38	70.1686	0.26184	0.082482
10	A10	39	70.4389	0.257402	0.0791829
10	A10	40	70.7092	0.252455	0.0758209
10	A10	41	70.9795	0.249189	0.0726911
10	A10	42	71.2498	0.245997	0.0700769
10	A10	43	71.5201	0.243602	0.0681398
10	A10	44	71.7905	0.240331	0.0668351
10	A10	45	72.0608	0.237228	0.0659144
10	A10	46	72.3311	0.233057	0.0650288
10	A10	47	72.6014	0.231249	0.0638831
10	A10	48	72.8717	0.225013	0.0623531
10	A10	49	73.142	0.224264	0.0605052
10	A10	50	73.4123	0.220956	0.0585175
10	A10	51	73.6826	0.217231	0.0565601
10	A10	52	73.9529	0.216004	0.0547205
10	A10	53	74.2232	0.213648	0.0530136
10	A10	54	74.4935	0.209206	0.0514528
10	A10	55	74.7638	0.206855	0.0501034
10	A10	56	75.0341	0.204897	0.0490534
10	A10	57	75.3045	0.203188	0.0483227
10	A10	58	75.5748	0.202083	0.0477982
10	A10	59	75.8451	0.197987	0.0472685
10	A10	60	76.1154	0.193763	0.0465418
10	A10	61	76.3857	0.193689	0.0455537
10	A10	62	76.656	0.191203	0.0443796
10	A10	63	76.9263	0.189081	0.0431535
10	A10	64	77.1966	0.185891	0.0419609
10	A10	65	77.4669	0.186115	0.0407884
10	A10	66	77.7372	0.182667	0.0395493
10	A10	67	78.0075	0.179946	0.0381647
10	A10	68	78.2778	0.179694	0.0366498
10	A10	69	78.5482	0.176185	0.0351555
10	A10	70	78.8185	0.17598	0.0339413
10	A10	71	79.0888	0.173067	0.0332766
10	A10	72	79.3591	0.173824	0.033315
10	A10	73	79.6294	0.171278	0.034002
10	A10	74	79.8997	0.170013	0.0350791
10	A10	75	80.17	0.168625	0.0361886
10	A10	76	80.4403	0.165348	0.0370246
10	A10	77	80.7106	0.162906	0.0374312
10	A10	78	80.9809	0.160974	0.0373954
10	A10	79	81.2512	0.16239	0.0369712
10	A10	80	81.5215	0.158224	0.0362208
10	A10	81	81.7919	0.155403	0.035223
10	A10	82	82.0622	0.153625	0.0341128
10	A10	83	82.3325	0.152748	0.0330717
10	A10	84	82.6028	0.153287	0.0322504
10	A10	85	82.8731	0.149834	0.031687
10	A10	86	83.1434	0.147949	0.031299
10	A10	87	83.4137	0.147603	0.0309573
10	A10	88	83.684	0.145344	0.0305755
10	A10	89	83.9543	0.142787	0.0301412
10	A10	90	84.2246	0.142354	0.0296693
10	A10	91	84.4949	0.142583	0.0291405
10	A10	92	84.7652	0.139443	0.0284888
10	A10	93	85.0356	0.136671	0.0276629
10	A10	94	85.3059	0.136915	0.026713
10	A10	95	85.5762	0.135434	0.0258264
10	A10	96	85.8465	0.13374	0.0252733
10	A10	97	86.1168	0.132994	0.0252796
10	A10	98	86.3871	0.133369	0.0258946
10	A10	99	86.6574	0.129636	0.0269228
10	A10	100	86.9277	0.129008	0.0279695
10	A10	101	87.198	0.128291	0.0285997
10	A10	102	87.4683	0.123193	0.0285381
10	A10	103	87.7386	0.123092	0.0277974
10	A10	104	88.0089	0.122855	0.0266433
10	A10	105	88.2793	0.123207	0.025421
10	A10	106	88.5496	0.120242	0.0243704
10	A10	107	88.8199	0.118545	0.0235613
10	A10	108	89.0902	0.118371	0.0229646
10	A10	109	89.3605	0.116945	0.0225615
10	A10	110	89.6308	0.116263	0.0223777
10	A10	111	89.9011	0.114658	0.0224175
10	A10	112	90.1714	0.115019	0.0225732
10	A10	113	90.4417	0.113095	0.0226056
10	A10	114	90.712	0.110353	0.0222342
10	A10	115	90.9823	0.110322	0.0212902
10	A10	116	91.2526	0.108876	0.0198377
10	A10	117	91.5229	0.108231	0.0181825
10	A10	118	91.7933	0.107205	0.016756
10	A10	119	92.0636	0.107855	0.0159296
10	A10	120	92.3339	0.108071	0.0158519
10	A10	121	92.6042	0.104844	0.0163811
10	A10	122	92.8745	0.104439	0.0171294
10	A10	123	93.1448	0.106207	0.0175943
10	A10	124	93.4151	0.101008	0.017325
10	A10	125	93.6854	0.102202	0.0160744
10	A10	126	93.9557	0.0989013	0.0138818
10	A10	127	94.226	0.101751	0.0110503
10	A10	128	94.4963	0.100041	0.00802622
10	A10	129	94.7666	0.0995112	0.00524117
11	A11	1	60.1672	3.13191	0.30773
11	A11	2	60.4375	3.10781	0.304849
11	A11	3	60.7078	3.08465	0.301139
11	A11	4	60.9781	3.05636	0.29761
11	A11	5	61.2484	3.034	0.295499
11	A11	6	61.5187	3.00475	0.295701
11	A11	7	61.789	2.98882	0.298314
11	A11	8	62.0594	2.95555	0.302608
11	A11	9	62.3297	2.93146	0.307439
11	A11	10	62.6	2.89176	0.311853
11	A11	11	62.8703	2.86369	0.315482
11	A11	12	63.1406	2.83651	0.318516
11	A11	13	63.4109	2.81409	0.321354
11	A11	14	63.6812	2.7757	0.324208
11	A11	15	63.9515	2.74917	0.32691
11	A11	16	64.2218	2.71679	0.328987
11	A11	17	64.4921	2.68807	0.329928
11	A11	18	64.7624	2.64981	0.329465
11	A11	19	65.0327	2.62167	0.327721
11	A11	20	65.3031	2.58644	0.325175
11	A11	21	65.5734	2.56418	0.32247
11	A11	22	65.8437	2.52943	0.320158
11	A11	23	66.114	2.50006	0.318551
11	A11	24	66.3843	2.47535	0.317704
11	A11	25	66.6546	2.44232	0.317572
11	A11	26	66.9249	2.41441	0.318181
11	A11	27	67.1952	2.37994	0.319724
11	A11	28	67.4655	2.35027	0.322478
11	A11	29	67.7358	2.3304	0.326659
11	A11	30	68.0061	2.29952	0.332339
11	A11	31	68.2764	2.25997	0.339568
11	A11	32	68.5468	2.23277	0.348648
11	A11	33	68.8171	2.20181	0.360421
11	A11	34	69.0874	2.16607	0.376387
11	A11	35	69.3577	2.13372	0.398612
11	A11	36	69.628	2.09802	0.429459
11	A11	37	69.8983	2.06331	0.471207
11	A11	38	70.1686	2.02044	0.525642
11	A11	39	70.4389	1.97722	0.59364
11	A11	40	70.7092	1.92604	0.674811
11	A11	41	70.9795	1.86281	0.767187
11	A11	42	71.2498	1.79263	0.867044
11	A11	43	71.5201	1.70898	0.9689
11	A11	44	71.7905	1.60906	1.06581
11	A11	45	72.0608	1.49978	1.15001
11	A11	46	72.3311	1.37391	1.21389
11	A11	47	72.6014	1.23766	1.25103
11	A11	48	72.8717	1.10396	1.25716
11	A11	49	73.142	0.970568	1.23069
11	A11	50	73.4123	0.842319	1.17286
11	A11	51	73.6826	0.722575	1.08752
11	A11	52	73.9529	0.615882	0.980636
11	A11	53	74.2232	0.522857	0.859605
11	A11	54	74.4935	0.453604	0.732428
11	A11	55	74.7638	0.390594	0.606781
11	A11	56	75.0341	0.349289	0.489187
11	A11	57	75.3045	0.318177	0.384418
11	A11	58	75.5748	0.296387	0.295233
11	A11	59	75.8451	0.282401	0.222477
11	A11	60	76.1154	0.271964	0.165441
11	A11	61	76.3857	0.263791	0.122371
11	A11	62	76.656	0.257787	0.0909821
11	A11	63	76.9263	0.255691	0.0688612
11	A11	64	77.1966	0.252542	0.0537493
11	A11	65	77.4669	0.247395	0.0436916
11	A11	66	77.7372	0.244619	0.0370969
11	A11	67	78.0075	0.242678	0.0327308
11	A11	68	78.2778	0.240847	0.0296762
11	A11	69	78.5482	0.238693	0.0272968
11	A11	70	78.8185	0.232076	0.025223
11	A11	71	79.0888	0.233211	0.0233332
11	A11	72	79.3591	0.229103	0.0216959
11	A11	73	79.6294	0.230021	0.0204601
11	A11	74	79.8997	0.227695	0.0197334
11	A11	75	80.17	0.225872	0.0195037
11	A11	76	80.4403	0.22443	0.0196361
11	A11	77	80.7106	0.222032	0.0199296
11	A11	78	80.9809	0.221733	0.0201915
11	A11	79	81.2512	0.216866	0.0202846
11	A11	80	81.5215	0.215312	0.0201306
11	A11	81	81.7919	0.216011	0.0196842
11	A11	82	82.0622	0.212112	0.0189185
11	A11	83	82.3325	0.210648	0.0178515
11	A11	84	82.6028	0.208082	0.0165939
11	A11	85	82.8731	0.206676	0.0153648
11	A11	86	83.1434	0.204304	0.0144251
11	A11	87	83.4137	0.206389	0.0139538
11	A11	88	83.684	0.207739	0.0139528
11	A11	89	83.9543	0.20155	0.0142585
11	A11	90	84.2246	0.200826	0.0146548
11	A11	91	84.4949	0.198736	0.014999
11	A11	92	84.7652	0.198912	0.0152661
11	A11	93	85.0356	0.197905	0.0154981
11	A11	94	85.3059	0.195235	0.0157207
11	A11	95	85.5762	0.194681	0.0159035
11	A11	96	85.8465	0.192282	0.0159829
11	A11	97	86.1168	0.190105	0.0159105
11	A11	98	86.3871	0.189779	0.0156838
11	A11	99	86.6574	0.186635	0.0153403
11	A11	100	86.9277	0.186437	0.0149381
11	A11	101	87.198	0.184209	0.0145435
11	A11	102	87.4683	0.181877	0.014225
11	A11	103	87.7386	0.18281	0.0140376
11	A11	104	88.0089	0.181487	0.0139885
11	A11	105	88.2793	0.179148	0.0140097
11	A11	106	88.5496	0.178082	0.0139687
11	A11	107	88.8199	0.177115	0.0137283
11	A11	108	89.0902	0.173957	0.0132214
11	A11	109	89.3605	0.173049	0.0124867
11	A11	110	89.6308	0.17465	0.0116403
11	A11	111	89.9011	0.170965	0.0108045
11	A11	112	90.1714	0.172288	0.0100528
11	A11	113	90.4417	0.170742	0.00941148
11	A11	114	90.712	0.167542	0.00890331
11	A11	115	90.9823	0.169265	0.0085772
11	A11	116	91.2526	0.169115	0.00848571
11	A11	117	91.5229	0.168397	0.00862961
11	A11	118	91.7933	0.166845	0.00893053
11	A11	119	92.0636	0.164476	0.00926901
11	A11	120	92.3339	0.165646	0.00955636
11	A11	121	92.6042	0.162049	0.00977324
11	A11	122	92.8745	0.163933	0.00993387
11	A11	123	93.1448	0.164005	0.0100095
11	A11	124	93.4151	0.159564	0.00988479
11	A11	125	93.6854	0.15882	0.00939184
11	A11	126	93.9557	0.160097	0.00840566
11	A11	127	94.226	0.157369	0.00693615
11	A11	128	94.4963	0.155562	0.00515631
11	A11	129	94.7666	0.158642	0.00334917
12	A12	1	60.1672	3.3886	0.306056
12	A12	2	60.4375	3.3568	0.302547
12	A12	3	60.7078	3.33773	0.298687
12	A12	4	60.9781	3.31424	0.295497
12	A12	5	61.2484	3.29854	0.29387
12	A12	6	61.5187	3.26621	0.29423
12	A12	7	61.789	3.2334	0.296513
12	A12	8	62.0594	3.20412	0.300348
12	A12	9	62.3297	3.19234	0.305266
12	A12	10	62.6	3.14982	0.31079
12	A12	11	62.8703	3.12313	0.316439
12	A12	12	63.1406	3.09877	0.321719
12	A12	13	63.4109	3.06448	0.326176
12	A12	14	63.6812	3.03174	0.329489
12	A12	15	63.9515	3.00079	0.331582
12	A12	16	64.2218	2.96806	0.332666
12	A12	17	64.4921	2.93841	0.333187
12	A12	18	64.7624	2.89947	0.333672
12	A12	19	65.0327	2.87822	0.334521
12	A12	20	65.3031	2.8457	0.33584
12	A12	21	65.5734	2.81377	0.337414
12	A12	22	65.8437	2.7762	0.338826
12	A12	23	66.114	2.75169	0.339651
12	A12	24	66.3843	2.71526	0.339646
12	A12	25	66.6546	2.68088	0.338842
12	A12	26	66.9249	2.65199	0.337528
12	A12	27	67.1952	2.6169	0.336109
12	A12	28	67.4655	2.5873	0.334956
12	A12	29	67.7358	2.56234	0.334302
12	A12	30	68.0061	2.52513	0.33426
12	A12	31	68.2764	2.49335	0.33493
12	A12	32	68.5468	2.46419	0.336488
12	A12	33	68.8171	2.43212	0.339161
12	A12	34	69.0874	2.40186	0.343146
12	A12	35	69.3577	2.37202	0.348574
12	A12	36	69.628	2.3386	0.35563
12	A12	37	69.8983	2.2988	0.364823
12	A12	38	70.1686	2.26603	0.377259
12	A12	39	70.4389	2.23292	0.394784
12	A12	40	70.7092	2.19747	0.419921
12	A12	41	70.9795	2.16327	0.455587
12	A12	42	71.2498	2.11912	0.504624
12	A12	43	71.5201	2.08315	0.569179
12	A12	44	71.7905	2.03745	0.650064
12	A12	45	72.0608	1.98097	0.746238
12	A12	46	72.3311	1.90555	0.854514
12	A12	47	72.6014	1.82725	0.969554
12	A12	48	72.8717	1.7292	1.08408
12	A12	49	73.142	1.61598	1.18936
12	A12	50	73.4123	1.4931	1.27603
12	A12	51	73.6826	1.34919	1.33524
12	A12	52	73.9529	1.19578	1.36001
12	A12	53	74.2232	1.04667	1.34644
12	A12	54	74.4935	0.900788	1.29439
12	A12	55	74.7638	0.760882	1.20745
12	A12	56	75.0341	0.640263	1.09242
12	A12	57	75.3045	0.536004	0.958289
12	A12	58	75.5748	0.452399	0.814989
12	A12	59	75.8451	0.391917	0.672199
12	A12	60	76.1154	0.346434	0.538214
12	A12	61	76.3857	0.313349	0.419142
12	A12	62	76.656	0.294342	0.318515
12	A12	63	76.9263	0.280304	0.237369
12	A12	64	77.1966	0.268447	0.174714
12	A12	65	77.4669	0.261411	0.128236
12	A12	66	77.7372	0.255822	0.0950011
12	A12	67	78.0075	0.250278	0.0720137
12	A12	68	78.2778	0.24898	0.0565476
12	A12	69	78.5482	0.24578	0.0462998
12	A12	70	78.8185	0.241011	0.0394499
12	A12	71	79.0888	0.236985	0.0346748
12	A12	72	79.3591	0.233685	0.031121
12	A12	73	79.6294	0.234742	0.0283196
12	A12	74	79.8997	0.229388	0.0260543
12	A12	75	80.17	0.22714	0.0242245
12	A12	76	80.4403	0.226618	0.0227448
12	A12	77	80.7106	0.224732	0.0215066
12	A12	78	80.9809	0.223264	0.0203988
12	A12	79	81.2512	0.218952	0.0193563
12	A12	80	81.5215	0.21793	0.0183909
12	A12	81	81.7919	0.216274	0.0175712
12	A12	82	82.0622	0.216131	0.0169657
12	A12	83	82.3325	0.216913	0.0165984
12	A12	84	82.6028	0.210279	0.0164469
12	A12	85	82.8731	0.210186	0.0164654
12	A12	86	83.1434	0.209119	0.0165876
12	A12	87	83.4137	0.210393	0.0167025
12	A12	88	83.684	0.206876	0.0166508
12	A12	89	83.9543	0.203719	0.0162848
12	A12	90	84.2246	0.201952	0.0155668
12	A12	91	84.4949	0.200126	0.014625
12	A12	92	84.7652	0.199724	0.0137035
12	A12	93	85.0356	0.19944	0.0130336
12	A12	94	85.3059	0.200247	0.0127148
12	A12	95	85.5762	0.196476	0.0126902
12	A12	96	85.8465	0.194511	0.0128205
12	A12	97	86.1168	0.195473	0.0129904
12	A12	98	86.3871	0.192715	0.0131657
12	A12	99	86.6574	0.190884	0.0133698
12	A12	100	86.9277	0.190176	0.0136115
12	A12	101	87.198	0.190964	0.0138291
12	A12	102	87.4683	0.186656	0.0139039
12	A12	103	87.7386	0.183733	0.0137337
12	A12	104	88.0089	0.185367	0.0133099
12	A12	105	88.2793	0.183355	0.0127404
12	A12	106	88.5496	0.182756	0.0122014
12	A12	107	88.8199	0.181368	0.0118579
12	A12	108	89.0902	0.179289	0.0117955
12	A12	109	89.3605	0.18126	0.0119858
12	A12	110	89.6308	0.178001	0.0122905
12	A12	111	89.9011	0.177378	0.0125056
12	A12	112	90.1714	0.174408	0.0124398
12	A12	113	90.4417	0.173826	0.0119971
12	A12	114	90.712	0.173295	0.0112242
12	A12	115	90.9823	0.171435	0.0102901
12	A12	116	91.2526	0.171537	0.00941059
12	A12	117	91.5229	0.171295	0.00875683
12	A12	118	91.7933	0.17058	0.00839702
12	A12	119	92.0636	0.170142	0.00829414
12	A12	120	92.3339	0.16668	0.00834475
12	A12	121	92.6042	0.169026	0.00842422
12	A12	122	92.8745	0.167189	0.00840901
12	A12	123	93.1448	0.166158	0.00817995
12	A12	124	93.4151	0.16493	0.00763443
12	A12	125	93.6854	0.164232	0.00672244
12	A12	126	93.9557	0.163281	0.00548843
12	A12	127	94.226	0.163297	0.00408209
12	A12	128	94.4963	0.163048	0.0027155
12	A12	129	94.7666	0.164837	0.00158328
25	B1	1	60.1672	4.01995	0.216479
25	B1	2	60.4375	4.00657	0.214176
25	B1	3	60.7078	3.99078	0.212064
25	B1	4	60.9781	3.97042	0.210699
25	B1	5	61.2484	3.94536	0.210477
25	B1	6	61.5187	3.92726	0.211528
25	B1	7	61.789	3.89779	0.213729
25	B1	8	62.0594	3.87177	0.21678
25	B1	9	62.3297	3.85764	0.220272
25	B1	10	62.6	3.82906	0.223758
25	B1	11	62.8703	3.80141	0.226848
25	B1	12	63.1406	3.77459	0.229315
25	B1	13	63.4109	3.75055	0.231132
25	B1	14	63.6812	3.72003	0.232416
25	B1	15	63.9515	3.69786	0.233319
25	B1	16	64.2218	3.67697	0.233982
25	B1	17	64.4921	3.64041	0.234572
25	B1	18	64.7624	3.61182	0.235318
25	B1	19	65.0327	3.59074	0.236451
25	B1	20	65.3031	3.56663	0.238047
25	B1	21	65.5734	3.54326	0.239896
25	B1	22	65.8437	3.51024	0.241553
25	B1	23	66.114	3.47686	0.242555
25	B1	24	66.3843	3.46104	0.242677
25	B1	25	66.6546	3.42544	0.242072
25	B1	26	66.9249	3.39259	0.24122
25	B1	27	67.1952	3.37451	0.240693
25	B1	28	67.4655	3.34881	0.240904
25	B1	29	67.7358	3.31865	0.241954
25	B1	30	68.0061	3.29452	0.243686
25	B1	31	68.2764	3.26868	0.245871
25	B1	32	68.5468	3.2362	0.248399
25	B1	33	68.8171	3.20216	0.251297
25	B1	34	69.0874	3.18326	0.254579
25	B1	35	69.3577	3.16373	0.258076
25	B1	36	69.628	3.1219	0.261426
25	B1	37	69.8983	3.08469	0.264272
25	B1	38	70.1686	3.06546	0.266488
25	B1	39	70.4389	3.02652	0.268255
25	B1	40	70.7092	3.00101	0.269908
25	B1	41	70.9795	2.96365	0.271648
25	B1	42	71.2498	2.94604	0.273304
25	B1	43	71.5201	2.91206	0.274334
25	B1	44	71.7905	2.87153	0.274039
25	B1	45	72.0608	2.84212	0.27191
25	B1	46	72.3311	2.81498	0.2679
25	B1	47	72.6014	2.77127	0.262447
25	B1	48	72.8717	2.75255	0.256288
25	B1	49	73.142	2.72596	0.250162
25	B1	50	73.4123	2.69435	0.244588
25	B1	51	73.6826	2.66701	0.239827
25	B1	52	73.9529	2.64642	0.235989
25	B1	53	74.2232	2.61301	0.233183
25	B1	54	74.4935	2.5875	0.231544
25	B1	55	74.7638	2.56557	0.231121
25	B1	56	75.0341	2.53648	0.231689
25	B1	57	75.3045	2.51806	0.232682
25	B1	58	75.5748	2.48749	0.233359
25	B1	59	75.8451	2.45	0.233164
25	B1	60	76.1154	2.42469	0.232053
25	B1	61	76.3857	2.40443	0.230581
25	B1	62	76.656	2.37538	0.229715
25	B1	63	76.9263	2.3544	0.230524
25	B1	64	77.1966	2.32952	0.233949
25	B1	65	77.4669	2.3008	0.240763
25	B1	66	77.7372	2.27689	0.251665
25	B1	67	78.0075	2.24965	0.267454
25	B1	68	78.2778	2.22232	0.289241
25	B1	69	78.5482	2.19296	0.318752
25	B1	70	78.8185	2.15421	0.358629
25	B1	71	79.0888	2.11178	0.412555
25	B1	72	79.3591	2.07474	0.484928
25	B1	73	79.6294	2.03366	0.579986
25	B1	74	79.8997	1.97943	0.700534
25	B1	75	80.17	1.90534	0.846512
25	B1	76	80.4403	1.81258	1.01357
25	B1	77	80.7106	1.69805	1.19173
25	B1	78	80.9809	1.54299	1.36442
25	B1	79	81.2512	1.36627	1.50876
25	B1	80	81.5215	1.17862	1.59848
25	B1	81	81.7919	0.931866	1.61011
25	B1	82	82.0622	0.604011	1.53102
25	B1	83	82.3325	0.33634	1.36584
25	B1	84	82.6028	0.188429	1.1374
25	B1	85	82.8731	0.134965	0.880722
25	B1	86	83.1434	0.123507	0.632481
25	B1	87	83.4137	0.117037	0.420756
25	B1	88	83.684	0.118589	0.259505
25	B1	89	83.9543	0.118325	0.149001
25	B1	90	84.2246	0.116579	0.0804649
25	B1	91	84.4949	0.111725	0.0417681
25	B1	92	84.7652	0.113924	0.0217282
25	B1	93	85.0356	0.114021	0.0121247
25	B1	94	85.3059	0.111462	0.00785922
25	B1	95	85.5762	0.112564	0.00618482
25	B1	96	85.8465	0.113021	0.00577776
25	B1	97	86.1168	0.109645	0.00603085
25	B1	98	86.3871	0.11103	0.00663259
25	B1	99	86.6574	0.109875	0.00736171
25	B1	100	86.9277	0.108482	0.00801925
25	B1	101	87.198	0.107259	0.0084428
25	B1	102	87.4683	0.103912	0.00855198
25	B1	103	87.7386	0.104669	0.00836898
25	B1	104	88.0089	0.104487	0.00798594
25	B1	105	88.2793	0.104836	0.00750011
25	B1	106	88.5496	0.101346	0.00696802
25	B1	107	88.8199	0.100656	0.00640808
25	B1	108	89.0902	0.101121	0.00583145
25	B1	109	89.3605	0.100919	0.00526166
25	B1	110	89.6308	0.101012	0.00473151
25	B1	111	89.9011	0.0984115	0.00427502
25	B1	112	90.1714	0.0978534	0.00393002
25	B1	113	90.4417	0.10062	0.00374189
25	B1	114	90.712	0.0980788	0.00374937
25	B1	115	90.9823	0.0985708	0.00395681
25	B1	116	91.2526	0.0975239	0.00431381
25	B1	117	91.5229	0.0979787	0.00471997
25	B1	118	91.7933	0.0958865	0.00504993
25	B1	119	92.0636	0.094958	0.00518689
25	B1	120	92.3339	0.0972275	0.00505671
25	B1	121	92.6042	0.0924129	0.00466048
25	B1	122	92.8745	0.09344	0.00409163
25	B1	123	93.1448	0.0930077	0.00351139
25	B1	124	93.4151	0.0940254	0.00307256
25	B1	125	93.6854	0.0950017	0.00282655
25	B1	126	93.9557	0.0934944	0.0026829
25	B1	127	94.226	0.0921925	0.00246647
25	B1	128	94.4963	0.0899045	0.00204028
25	B1	129	94.7666	0.091959	0.00140381
26	B2	1	60.1672	4.12284	0.221647
26	B2	2	60.4375	4.11857	0.221449
26	B2	3	60.7078	4.07229	0.221153
26	B2	4	60.9781	4.06388	0.220974
26	B2	5	61.2484	4.03652	0.221239
26	B2	6	61.5187	4.0095	0.222168
26	B2	7	61.789	3.98368	0.223673
26	B2	8	62.0594	3.96386	0.225345
26	B2	9	62.3297	3.93425	0.226656
26	B2	10	62.6	3.90404	0.227246
26	B2	11	62.8703	3.86817	0.227098
26	B2	12	63.1406	3.85383	0.226519
26	B2	13	63.4109	3.83199	0.225956
26	B2	14	63.6812	3.7978	0.225793
26	B2	15	63.9515	3.76636	0.226215
26	B2	16	64.2218	3.74467	0.227118
26	B2	17	64.4921	3.72885	0.228149
26	B2	18	64.7624	3.69624	0.228851
26	B2	19	65.0327	3.65879	0.228916
26	B2	20	65.3031	3.62988	0.228369
26	B2	21	65.5734	3.61605	0.227552
26	B2	22	65.8437	3.58245	0.2269
26	B2	23	66.114	3.5573	0.226697
26	B2	24	66.3843	3.53576	0.226972
26	B2	25	66.6546	3.50595	0.227599
26	B2	26	66.9249	3.47244	0.22845
26	B2	27	67.1952	3.45297	0.229473
26	B2	28	67.4655	3.42457	0.230636
26	B2	29	67.7358	3.39914	0.231844
26	B2	30	68.0061	3.37339	0.232906
26	B2	31	68.2764	3.3389	0.233599
26	B2	32	68.5468	3.31603	0.233761
26	B2	33	68.8171	3.28828	0.233352
26	B2	34	69.0874	3.25849	0.232436
26	B2	35	69.3577	3.23201	0.231156
26	B2	36	69.628	3.2051	0.229712
26	B2	37	69.8983	3.17689	0.228366
26	B2	38	70.1686	3.14647	0.227411
26	B2	39	70.4389	3.12191	0.227065
26	B2	40	70.7092	3.09762	0.227336
26	B2	41	70.9795	3.07562	0.227971
26	B2	42	71.2498	3.04317	0.228555
26	B2	43	71.5201	3.01574	0.228731
26	B2	44	71.7905	2.98224	0.228381
26	B2	45	72.0608	2.96428	0.227651
26	B2	46	72.3311	2.93489	0.226799
26	B2	47	72.6014	2.90642	0.226004
26	B2	48	72.8717	2.88261	0.225286
26	B2	49	73.142	2.86016	0.224564
26	B2	50	73.4123	2.82397	0.223791
26	B2	51	73.6826	2.79567	0.223022
26	B2	52	73.9529	2.78208	0.222361
26	B2	53	74.2232	2.75111	0.221874
26	B2	54	74.4935	2.72389	0.221543
26	B2	55	74.7638	2.69306	0.221325
26	B2	56	75.0341	2.67121	0.221225
26	B2	57	75.3045	2.64259	0.221325
26	B2	58	75.5748	2.61715	0.221726
26	B2	59	75.8451	2.59438	0.222472
26	B2	60	76.1154	2.56015	0.223546
26	B2	61	76.3857	2.54223	0.224912
26	B2	62	76.656	2.5089	0.226593
26	B2	63	76.9263	2.48519	0.228736
26	B2	64	77.1966	2.45905	0.231667
26	B2	65	77.4669	2.43145	0.235958
26	B2	66	77.7372	2.40326	0.242523
26	B2	67	78.0075	2.37333	0.252665
26	B2	68	78.2778	2.34829	0.268103
26	B2	69	78.5482	2.32179	0.290954
26	B2	70	78.8185	2.2901	0.32375
26	B2	71	79.0888	2.25366	0.36953
26	B2	72	79.3591	2.21498	0.431949
26	B2	73	79.6294	2.16677	0.515219
26	B2	74	79.8997	2.12335	0.623611
26	B2	75	80.17	2.05054	0.760235
26	B2	76	80.4403	1.97109	0.924908
26	B2	77	80.7106	1.87503	1.11133
26	B2	78	80.9809	1.74581	1.30447
26	B2	79	81.2512	1.58029	1.47988
26	B2	80	81.5215	1.38091	1.60676
26	B2	81	81.7919	1.09254	1.65538
26	B2	82	82.0622	0.749902	1.60684
26	B2	83	82.3325	0.465488	1.4611
26	B2	84	82.6028	0.266023	1.23896
26	B2	85	82.8731	0.181039	0.976372
26	B2	86	83.1434	0.163369	0.713321
26	B2	87	83.4137	0.162796	0.48247
26	B2	88	83.684	0.160849	0.302165
26	B2	89	83.9543	0.159166	0.175751
26	B2	90	84.2246	0.157659	0.0957838
26	B2	91	84.4949	0.156446	0.0499755
26	B2	92	84.7652	0.156534	0.0261178
26	B2	93	85.0356	0.156207	0.0147244
26	B2	94	85.3059	0.15423	0.00961404
26	B2	95	85.5762	0.152627	0.0073258
26	B2	96	85.8465	0.151929	0.00619396
26	B2	97	86.1168	0.153793	0.00554927
26	B2	98	86.3871	0.151227	0.00518359
26	B2	99	86.6574	0.150668	0.00505104
26	B2	100	86.9277	0.151023	0.00512836
26	B2	101	87.198	0.150666	0.0053671
26	B2	102	87.4683	0.148051	0.00568904
26	B2	103	87.7386	0.148795	0.00600035
26	B2	104	88.0089	0.148971	0.0062111
26	B2	105	88.2793	0.144835	0.00625602
26	B2	106	88.5496	0.146364	0.0061119
26	B2	107	88.8199	0.145709	0.00580465
26	B2	108	89.0902	0.144101	0.00540021
26	B2	109	89.3605	0.142707	0.00497921
26	B2	110	89.6308	0.146151	0.00460477
26	B2	111	89.9011	0.1421	0.00429916
26	B2	112	90.1714	0.141591	0.00404297
26	B2	113	90.4417	0.143849	0.00379814
26	B2	114	90.712	0.141232	0.00354355
26	B2	115	90.9823	0.141074	0.00330033
26	B2	116	91.2526	0.1401	0.00312786
26	B2	117	91.5229	0.141637	0.00308553
26	B2	118	91.7933	0.142117	0.00318383
26	B2	119	92.0636	0.140206	0.00336489
26	B2	120	92.3339	0.138094	0.0035352
26	B2	121	92.6042	0.139864	0.00362719
26	B2	122	92.8745	0.1379	0.00363646
26	B2	123	93.1448	0.13843	0.00360083
26	B2	124	93.4151	0.139038	0.00353959
26	B2	125	93.6854	0.137824	0.003412
26	B2	126	93.9557	0.136805	0.00313749
26	B2	127	94.226	0.134996	0.00266271
26	B2	128	94.4963	0.136106	0.00201935
26	B2	129	94.7666	0.136902	0.00132229
27	B3	1	60.1672	4.1492	0.215704
27	B3	2	60.4375	4.14531	0.214306
27	B3	3	60.7078	4.12306	0.213769
27	B3	4	60.9781	4.09827	0.214406
27	B3	5	61.2484	4.08224	0.216174
27	B3	6	61.5187	4.04755	0.218689
27	B3	7	61.789	4.02221	0.221371
27	B3	8	62.0594	3.99003	0.223647
27	B3	9	62.3297	3.97137	0.225114
27	B3	10	62.6	3.94444	0.225661
27	B3	11	62.8703	3.90649	0.225537
27	B3	12	63.1406	3.88839	0.225285
27	B3	13	63.4109	3.84439	0.225473
27	B3	14	63.6812	3.83682	0.226346
27	B3	15	63.9515	3.82041	0.22762
27	B3	16	64.2218	3.77677	0.228662
27	B3	17	64.4921	3.739	0.22895
27	B3	18	64.7624	3.71256	0.228461
27	B3	19	65.0327	3.69628	0.227685
27	B3	20	65.3031	3.66135	0.227296
27	B3	21	65.5734	3.64351	0.227724
27	B3	22	65.8437	3.60538	0.228939
27	B3	23	66.114	3.58935	0.23052
27	B3	24	66.3843	3.55344	0.231916
27	B3	25	66.6546	3.52354	0.232702
27	B3	26	66.9249	3.49795	0.232734
27	B3	27	67.1952	3.471	0.232121
27	B3	28	67.4655	3.42767	0.231082
27	B3	29	67.7358	3.42218	0.229793
27	B3	30	68.0061	3.38979	0.228357
27	B3	31	68.2764	3.35432	0.226896
27	B3	32	68.5468	3.32464	0.225659
27	B3	33	68.8171	3.29903	0.224979
27	B3	34	69.0874	3.27853	0.225097
27	B3	35	69.3577	3.26055	0.226019
27	B3	36	69.628	3.21858	0.227583
27	B3	37	69.8983	3.18866	0.229684
27	B3	38	70.1686	3.16236	0.232428
27	B3	39	70.4389	3.13691	0.236028
27	B3	40	70.7092	3.11177	0.240516
27	B3	41	70.9795	3.08321	0.245471
27	B3	42	71.2498	3.04789	0.250021
27	B3	43	71.5201	3.02404	0.25308
27	B3	44	71.7905	2.97757	0.253749
27	B3	45	72.0608	2.95502	0.251646
27	B3	46	72.3311	2.91877	0.247072
27	B3	47	72.6014	2.88559	0.240949
27	B3	48	72.8717	2.8563	0.234555
27	B3	49	73.142	2.83411	0.229114
27	B3	50	73.4123	2.81032	0.225403
27	B3	51	73.6826	2.78547	0.223513
27	B3	52	73.9529	2.75168	0.222899
27	B3	53	74.2232	2.73382	0.222693
27	B3	54	74.4935	2.70308	0.22214
27	B3	55	74.7638	2.66203	0.220949
27	B3	56	75.0341	2.64336	0.219367
27	B3	57	75.3045	2.61694	0.217965
27	B3	58	75.5748	2.59209	0.217258
27	B3	59	75.8451	2.56862	0.217407
27	B3	60	76.1154	2.53792	0.218188
27	B3	61	76.3857	2.51464	0.219188
27	B3	62	76.656	2.48014	0.220108
27	B3	63	76.9263	2.45643	0.220973
27	B3	64	77.1966	2.43349	0.222189
27	B3	65	77.4669	2.40251	0.224507
27	B3	66	77.7372	2.37782	0.228983
27	B3	67	78.0075	2.35013	0.237009
27	B3	68	78.2778	2.32548	0.250414
27	B3	69	78.5482	2.29412	0.271581
27	B3	70	78.8185	2.26889	0.303571
27	B3	71	79.0888	2.23677	0.350188
27	B3	72	79.3591	2.20057	0.415927
27	B3	73	79.6294	2.15124	0.505592
27	B3	74	79.8997	2.10566	0.623421
27	B3	75	80.17	2.04595	0.771542
27	B3	76	80.4403	1.96234	0.947825
27	B3	77	80.7106	1.84935	1.14344
27	B3	78	80.9809	1.7011	1.34099
27	B3	79	81.2512	1.51675	1.51458
27	B3	80	81.5215	1.31003	1.63338
27	B3	81	81.7919	1.01627	1.6691
27	B3	82	82.0622	0.647625	1.60548
27	B3	83	82.3325	0.345878	1.44566
27	B3	84	82.6028	0.166846	1.21331
27	B3	85	82.8731	0.0991067	0.946046
27	B3	86	83.1434	0.085191	0.683808
27	B3	87	83.4137	0.0788744	0.457721
27	B3	88	83.684	0.0783169	0.283893
27	B3	89	83.9543	0.0751321	0.163681
27	B3	90	84.2246	0.0754245	0.0884968
27	B3	91	84.4949	0.073777	0.0458189
27	B3	92	84.7652	0.0742602	0.0237987
27	B3	93	85.0356	0.072064	0.0134998
27	B3	94	85.3059	0.0730249	0.00919388
27	B3	95	85.5762	0.0714365	0.00765666
27	B3	96	85.8465	0.0707655	0.0072551
27	B3	97	86.1168	0.0692325	0.00722749
27	B3	98	86.3871	0.0687656	0.00724268
27	B3	99	86.6574	0.0674387	0.00717349
27	B3	100	86.9277	0.0656012	0.0069914
27	B3	101	87.198	0.0652489	0.00671363
27	B3	102	87.4683	0.0650291	0.00637076
27	B3	103	87.7386	0.0651372	0.00599207
27	B3	104	88.0089	0.0630009	0.00561336
27	B3	105	88.2793	0.0612111	0.0052955
27	B3	106	88.5496	0.0618775	0.00512157
27	B3	107	88.8199	0.0633644	0.00515536
27	B3	108	89.0902	0.0631716	0.00538544
27	B3	109	89.3605	0.0591609	0.00570763
27	B3	110	89.6308	0.0591891	0.00597302
27	B3	111	89.9011	0.0595251	0.00607008
27	B3	112	90.1714	0.0563296	0.00597761
27	B3	113	90.4417	0.0577817	0.00575136
27	B3	114	90.712	0.0574028	0.00546449
27	B3	115	90.9823	0.0562876	0.00515579
27	B3	116	91.2526	0.0551155	0.00482364
27	B3	117	91.5229	0.0538445	0.00445979
27	B3	118	91.7933	0.0551195	0.00408434
27	B3	119	92.0636	0.0540183	0.00374866
27	B3	120	92.3339	0.0533093	0.00350557
27	B3	121	92.6042	0.0540221	0.00337364
27	B3	122	92.8745	0.0535409	0.00332453
27	B3	123	93.1448	0.0521467	0.00329904
27	B3	124	93.4151	0.0508916	0.00323377
27	B3	125	93.6854	0.0526884	0.00307721
27	B3	126	93.9557	0.0521481	0.00279206
27	B3	127	94.226	0.050381	0.00235937
27	B3	128	94.4963	0.0496736	0.00179442
27	B3	129	94.7666	0.0502519	0.00116097
28	B4	1	60.1672	4.33747	0.195096
28	B4	2	60.4375	4.31439	0.194937
28	B4	3	60.7078	4.29058	0.194831
28	B4	4	60.9781	4.26964	0.194968
28	B4	5	61.2484	4.23816	0.19557
28	B4	6	61.5187	4.22108	0.196727
28	B4	7	61.789	4.18917	0.19829
28	B4	8	62.0594	4.17069	0.199917
28	B4	9	62.3297	4.12606	0.201236
28	B4	10	62.6	4.10961	0.20202
28	B4	11	62.8703	4.08373	0.202257
28	B4	12	63.1406	4.04992	0.202103
28	B4	13	63.4109	4.02595	0.201742
28	B4	14	63.6812	3.99105	0.201291
28	B4	15	63.9515	3.98161	0.200759
28	B4	16	64.2218	3.94852	0.20013
28	B4	17	64.4921	3.89406	0.199421
[truncated: 13,528 more rows]
